# Supplementary material for: CellTree: an R/bioconductor package to infer the hierarchical structure of cell populations from single-cell RNA-seq data
Source: PubMed Central journal article supplement (PMC5020541; doi:10.1186/s12859-016-1175-6), 2016-09-13
Supplement: 12859_2016_1175_MOESM2_ESM.pdf [file 12859_2016_1175_MOESM2_ESM.pdf]

## Ordered cells by branch

Legend:  Topic #1  Topic #2  Topic #3  Topic #4  Topic #5

Table 1: Branch 1

| node.label | cell.name  | cell.group | main.topic | topics                                                                                |
|------------|------------|------------|------------|---------------------------------------------------------------------------------------|
| 4          | T0_CT_A06  | 0          | 1          |    |
| 40         | T0_CT_E08  | 0          | 1          |    |
| 13         | T0_CT_B08  | 0          | 1          |    |
| 15         | T0_CT_C02  | 0          | 1          |    |
| 30         | T0_CT_D08  | 0          | 1          |    |
| 60         | T0_CT_G08  | 0          | 1          |    |
| 59         | T0_CT_G07  | 0          | 1          |    |
| 10         | T0_CT_B03  | 0          | 1          |    |
| 58         | T0_CT_G04  | 0          | 1          |    |
| 28         | T0_CT_D06  | 0          | 1          |    |
| 41         | T0_CT_E09  | 0          | 1          |    |
| 34         | T0_CT_E01  | 0          | 1          |    |
| 65         | T0_CT_H04  | 0          | 1          |    |
| 1          | T0_CT_A01  | 0          | 1          |    |
| 53         | T0_CT_F11  | 0          | 1          |    |
| 196        | T48_CT_E12 | 48         | 1          |    |
| 126        | T24_CT_F12 | 24         | 1          |    |
| 150        | T48_CT_A07 | 48         | 1          |    |
| 24         | T0_CT_D01  | 0          | 5          |   |
| 45         | T0_CT_F01  | 0          | 1          |  |

Table 2: Branch 1.1

| node.label | cell.name  | cell.group | main.topic | topics                                                                                |
|------------|------------|------------|------------|---------------------------------------------------------------------------------------|
| 2          | T0_CT_A03  | 0          | 1          |  |
| 50         | T0_CT_F06  | 0          | 1          |  |
| 26         | T0_CT_D03  | 0          | 1          |  |
| 20         | T0_CT_C08  | 0          | 1          |  |
| 23         | T0_CT_C12  | 0          | 1          |  |
| 55         | T0_CT_G01  | 0          | 1          |  |
| 5          | T0_CT_A07  | 0          | 1          |  |
| 3          | T0_CT_A05  | 0          | 1          |  |
| 268        | T72_CT_H09 | 72         | 1          |  |
| 47         | T0_CT_F03  | 0          | 1          |  |
| 137        | T24_CT_H01 | 24         | 1          |  |
| 14         | T0_CT_B09  | 0          | 1          |  |
| 39         | T0_CT_E07  | 0          | 1          |  |
| 38         | T0_CT_E06  | 0          | 1          |  |
| 57         | T0_CT_G03  | 0          | 1          |  |
| 43         | T0_CT_E11  | 0          | 1          |  |
| 54         | T0_CT_F12  | 0          | 1          |  |

|     |            |    |   |                                                                                       |
|-----|------------|----|---|---------------------------------------------------------------------------------------|
| 46  | T0_CT_F02  | 0  | 1 |    |
| 33  | T0_CT_D12  | 0  | 1 |    |
| 48  | T0_CT_F04  | 0  | 1 |    |
| 44  | T0_CT_E12  | 0  | 1 |    |
| 86  | T24_CT_B11 | 24 | 1 |    |
| 211 | T48_CT_G10 | 48 | 1 |    |
| 73  | T24_CT_A05 | 24 | 1 |    |
| 7   | T0_CT_A10  | 0  | 1 |    |
| 35  | T0_CT_E03  | 0  | 1 |    |
| 19  | T0_CT_C07  | 0  | 1 |    |
| 25  | T0_CT_D02  | 0  | 1 |    |
| 69  | T0_CT_H12  | 0  | 1 |    |
| 66  | T0_CT_H05  | 0  | 1 |    |
| 27  | T0_CT_D05  | 0  | 2 |    |
| 9   | T0_CT_B01  | 0  | 2 |    |
| 68  | T0_CT_H09  | 0  | 2 |    |
| 63  | T0_CT_H01  | 0  | 2 |    |
| 112 | T24_CT_E07 | 24 | 2 |    |
| 130 | T24_CT_G04 | 24 | 5 |    |
| 18  | T0_CT_C06  | 0  | 2 |    |
| 148 | T48_CT_A05 | 48 | 5 |    |
| 188 | T48_CT_E03 | 48 | 2 |    |
| 124 | T24_CT_F10 | 24 | 2 |    |
| 62  | T0_CT_G11  | 0  | 1 |    |
| 261 | T72_CT_G08 | 72 | 4 |  |
| 51  | T0_CT_F07  | 0  | 5 |  |
| 67  | T0_CT_H08  | 0  | 1 |  |
| 12  | T0_CT_B07  | 0  | 1 |  |
| 11  | T0_CT_B05  | 0  | 1 |  |
| 29  | T0_CT_D07  | 0  | 1 |  |
| 56  | T0_CT_G02  | 0  | 1 |  |
| 16  | T0_CT_C03  | 0  | 3 |  |
| 70  | T24_CT_A01 | 24 | 3 |  |
| 205 | T48_CT_G01 | 48 | 3 |  |
| 136 | T24_CT_G12 | 24 | 3 |  |
| 113 | T24_CT_E09 | 24 | 3 |  |
| 133 | T24_CT_G08 | 24 | 3 |  |
| 87  | T24_CT_C01 | 24 | 3 |  |
| 142 | T24_CT_H09 | 24 | 3 |  |
| 85  | T24_CT_B09 | 24 | 3 |  |
| 76  | T24_CT_A09 | 24 | 3 |  |
| 143 | T24_CT_H12 | 24 | 3 |  |
| 138 | T24_CT_H02 | 24 | 3 |  |
| 89  | T24_CT_C03 | 24 | 3 |  |
| 101 | T24_CT_D05 | 24 | 3 |  |
| 103 | T24_CT_D07 | 24 | 2 |  |
| 95  | T24_CT_C11 | 24 | 2 |  |
| 78  | T24_CT_B01 | 24 | 3 |  |
| 102 | T24_CT_D06 | 24 | 3 |  |
| 219 | T48_CT_H07 | 48 | 2 |  |

|     |            |    |   |                                                                                       |
|-----|------------|----|---|---------------------------------------------------------------------------------------|
| 140 | T24_CT_H05 | 24 | 3 |    |
| 121 | T24_CT_F07 | 24 | 2 |    |
| 119 | T24_CT_F04 | 24 | 2 |    |
| 37  | T0_CT_E05  | 0  | 2 |    |
| 77  | T24_CT_A10 | 24 | 2 |    |
| 203 | T48_CT_F10 | 48 | 2 |    |
| 212 | T48_CT_G11 | 48 | 2 |    |
| 132 | T24_CT_G06 | 24 | 3 |    |
| 109 | T24_CT_E02 | 24 | 3 |    |
| 122 | T24_CT_F08 | 24 | 3 |    |
| 79  | T24_CT_B02 | 24 | 3 |    |
| 94  | T24_CT_C10 | 24 | 3 |    |
| 100 | T24_CT_D04 | 24 | 3 |    |
| 177 | T48_CT_D03 | 48 | 3 |    |
| 194 | T48_CT_E10 | 48 | 3 |    |
| 141 | T24_CT_H07 | 24 | 3 |    |
| 248 | T72_CT_D10 | 72 | 4 |    |
| 199 | T48_CT_F03 | 48 | 3 |    |
| 61  | T0_CT_G09  | 0  | 3 |    |
| 269 | T72_CT_H10 | 72 | 4 |    |
| 198 | T48_CT_F02 | 48 | 2 |    |
| 164 | T48_CT_B12 | 48 | 2 |    |
| 183 | T48_CT_D10 | 48 | 2 |    |
| 189 | T48_CT_E04 | 48 | 2 |    |
| 201 | T48_CT_F07 | 48 | 3 |  |
| 118 | T24_CT_F03 | 24 | 3 |  |
| 120 | T24_CT_F05 | 24 | 3 |  |
| 152 | T48_CT_A09 | 48 | 3 |  |
| 171 | T48_CT_C07 | 48 | 2 |  |
| 125 | T24_CT_F11 | 24 | 2 |  |
| 176 | T48_CT_D02 | 48 | 2 |  |
| 108 | T24_CT_E01 | 24 | 3 |  |
| 155 | T48_CT_A12 | 48 | 2 |  |
| 187 | T48_CT_E02 | 48 | 2 |  |
| 221 | T48_CT_H11 | 48 | 2 |  |
| 181 | T48_CT_D08 | 48 | 3 |  |
| 114 | T24_CT_E11 | 24 | 3 |  |
| 195 | T48_CT_E11 | 48 | 3 |  |
| 161 | T48_CT_B08 | 48 | 3 |  |
| 173 | T48_CT_C10 | 48 | 3 |  |
| 204 | T48_CT_F11 | 48 | 3 |  |
| 225 | T72_CT_A08 | 72 | 3 |  |
| 270 | T72_CT_H11 | 72 | 4 |  |
| 236 | T72_CT_B11 | 72 | 4 |  |
| 250 | T72_CT_E04 | 72 | 4 |  |
| 255 | T72_CT_F07 | 72 | 4 |  |
| 239 | T72_CT_C06 | 72 | 4 |  |
| 230 | T72_CT_B03 | 72 | 4 |  |
| 263 | T72_CT_G11 | 72 | 4 |  |
| 241 | T72_CT_C09 | 72 | 4 |  |

|     |            |    |   |  |
|-----|------------|----|---|--|
| 244 | T72_CT_D03 | 72 | 3 |  |
| 247 | T72_CT_D07 | 72 | 4 |  |
| 246 | T72_CT_D05 | 72 | 4 |  |
| 233 | T72_CT_B06 | 72 | 3 |  |
| 229 | T72_CT_B02 | 72 | 3 |  |
| 249 | T72_CT_D11 | 72 | 3 |  |
| 231 | T72_CT_B04 | 72 | 3 |  |
| 259 | T72_CT_G04 | 72 | 3 |  |
| 192 | T48_CT_E07 | 48 | 3 |  |
| 258 | T72_CT_G03 | 72 | 3 |  |
| 6   | T0_CT_A08  | 0  | 3 |  |
| 75  | T24_CT_A08 | 24 | 3 |  |
| 146 | T48_CT_A03 | 48 | 3 |  |
| 235 | T72_CT_B09 | 72 | 3 |  |
| 159 | T48_CT_B04 | 48 | 3 |  |
| 128 | T24_CT_G02 | 24 | 3 |  |
| 185 | T48_CT_D12 | 48 | 3 |  |
| 191 | T48_CT_E06 | 48 | 3 |  |
| 135 | T24_CT_G11 | 24 | 3 |  |
| 111 | T24_CT_E05 | 24 | 3 |  |
| 216 | T48_CT_H04 | 48 | 3 |  |
| 166 | T48_CT_C02 | 48 | 3 |  |
| 149 | T48_CT_A06 | 48 | 3 |  |
| 129 | T24_CT_G03 | 24 | 3 |  |
| 83  | T24_CT_B07 | 24 | 3 |  |
| 168 | T48_CT_C04 | 48 | 3 |  |
| 158 | T48_CT_B03 | 48 | 3 |  |
| 8   | T0_CT_A11  | 0  | 3 |  |

Table 3: Branch 1.2

| node.label | cell.name  | cell.group | main.topic | topics |
|------------|------------|------------|------------|--------|
| 49         | T0_CT_F05  | 0          | 5          |        |
| 64         | T0_CT_H02  | 0          | 5          |        |
| 21         | T0_CT_C09  | 0          | 5          |        |
| 31         | T0_CT_D09  | 0          | 5          |        |
| 36         | T0_CT_E04  | 0          | 5          |        |
| 17         | T0_CT_C05  | 0          | 5          |        |
| 32         | T0_CT_D11  | 0          | 5          |        |
| 123        | T24_CT_F09 | 24         | 5          |        |
| 72         | T24_CT_A04 | 24         | 5          |        |
| 98         | T24_CT_D02 | 24         | 5          |        |
| 52         | T0_CT_F09  | 0          | 5          |        |
| 117        | T24_CT_F02 | 24         | 5          |        |
| 106        | T24_CT_D10 | 24         | 5          |        |
| 127        | T24_CT_G01 | 24         | 5          |        |
| 90         | T24_CT_C05 | 24         | 5          |        |
| 99         | T24_CT_D03 | 24         | 5          |        |
| 22         | T0_CT_C11  | 0          | 5          |        |
| 104        | T24_CT_D08 | 24         | 5          |        |

|     |            |    |   |                                                                                       |
|-----|------------|----|---|---------------------------------------------------------------------------------------|
| 84  | T24_CT_B08 | 24 | 5 |    |
| 92  | T24_CT_C08 | 24 | 5 |    |
| 156 | T48_CT_B01 | 48 | 5 |    |
| 93  | T24_CT_C09 | 24 | 5 |    |
| 218 | T48_CT_H06 | 48 | 5 |    |
| 74  | T24_CT_A07 | 24 | 5 |    |
| 134 | T24_CT_G10 | 24 | 5 |    |
| 131 | T24_CT_G05 | 24 | 5 |    |
| 213 | T48_CT_G12 | 48 | 5 |    |
| 88  | T24_CT_C02 | 24 | 5 |    |
| 153 | T48_CT_A10 | 48 | 5 |    |
| 157 | T48_CT_B02 | 48 | 2 |    |
| 97  | T24_CT_D01 | 24 | 2 |    |
| 182 | T48_CT_D09 | 48 | 2 |    |
| 197 | T48_CT_F01 | 48 | 5 |    |
| 175 | T48_CT_D01 | 48 | 2 |    |
| 214 | T48_CT_H01 | 48 | 5 |    |
| 139 | T24_CT_H03 | 24 | 5 |    |
| 217 | T48_CT_H05 | 48 | 5 |    |
| 208 | T48_CT_G07 | 48 | 5 |    |
| 81  | T24_CT_B05 | 24 | 5 |    |
| 82  | T24_CT_B06 | 24 | 5 |    |
| 116 | T24_CT_F01 | 24 | 2 |    |
| 207 | T48_CT_G03 | 48 | 5 |    |
| 115 | T24_CT_E12 | 24 | 2 |  |
| 145 | T48_CT_A02 | 48 | 5 |  |
| 107 | T24_CT_D11 | 24 | 5 |  |
| 160 | T48_CT_B06 | 48 | 5 |  |
| 202 | T48_CT_F09 | 48 | 5 |  |
| 71  | T24_CT_A03 | 24 | 5 |  |
| 147 | T48_CT_A04 | 48 | 5 |  |
| 162 | T48_CT_B10 | 48 | 5 |  |
| 167 | T48_CT_C03 | 48 | 2 |  |
| 110 | T24_CT_E04 | 24 | 5 |  |
| 91  | T24_CT_C07 | 24 | 2 |  |
| 190 | T48_CT_E05 | 48 | 2 |  |
| 96  | T24_CT_C12 | 24 | 5 |  |
| 80  | T24_CT_B03 | 24 | 2 |  |
| 154 | T48_CT_A11 | 48 | 5 |  |
| 209 | T48_CT_G08 | 48 | 2 |  |
| 200 | T48_CT_F05 | 48 | 5 |  |
| 193 | T48_CT_E08 | 48 | 5 |  |
| 174 | T48_CT_C11 | 48 | 5 |  |
| 180 | T48_CT_D07 | 48 | 5 |  |
| 170 | T48_CT_C06 | 48 | 2 |  |
| 165 | T48_CT_C01 | 48 | 5 |  |
| 210 | T48_CT_G09 | 48 | 2 |  |
| 220 | T48_CT_H08 | 48 | 5 |  |
| 169 | T48_CT_C05 | 48 | 5 |  |
| 151 | T48_CT_A08 | 48 | 5 |  |

|     |            |    |   |                                                                                       |
|-----|------------|----|---|---------------------------------------------------------------------------------------|
| 206 | T48_CT_G02 | 48 | 5 |    |
| 163 | T48_CT_B11 | 48 | 5 |    |
| 105 | T24_CT_D09 | 24 | 5 |    |
| 222 | T48_CT_H12 | 48 | 5 |    |
| 178 | T48_CT_D04 | 48 | 5 |    |
| 179 | T48_CT_D06 | 48 | 5 |    |
| 42  | T0_CT_E10  | 0  | 5 |    |
| 144 | T48_CT_A01 | 48 | 5 |    |
| 228 | T72_CT_B01 | 72 | 5 |    |
| 224 | T72_CT_A05 | 72 | 5 |    |
| 223 | T72_CT_A01 | 72 | 5 |    |
| 215 | T48_CT_H02 | 48 | 5 |    |
| 227 | T72_CT_A11 | 72 | 5 |    |
| 232 | T72_CT_B05 | 72 | 4 |    |
| 237 | T72_CT_B12 | 72 | 5 |    |
| 256 | T72_CT_F10 | 72 | 5 |    |
| 243 | T72_CT_D01 | 72 | 5 |    |
| 265 | T72_CT_H03 | 72 | 5 |    |
| 253 | T72_CT_F01 | 72 | 5 |    |
| 262 | T72_CT_G10 | 72 | 5 |    |
| 271 | T72_CT_H12 | 72 | 5 |    |
| 186 | T48_CT_E01 | 48 | 4 |    |
| 226 | T72_CT_A09 | 72 | 5 |    |
| 251 | T72_CT_E05 | 72 | 5 |    |
| 254 | T72_CT_F05 | 72 | 5 |    |
| 264 | T72_CT_H01 | 72 | 5 |   |
| 238 | T72_CT_C04 | 72 | 5 |  |
| 252 | T72_CT_E07 | 72 | 5 |  |
| 245 | T72_CT_D04 | 72 | 5 |  |
| 240 | T72_CT_C07 | 72 | 5 |  |
| 172 | T48_CT_C09 | 48 | 5 |  |
| 184 | T48_CT_D11 | 48 | 5 |  |
| 257 | T72_CT_F11 | 72 | 5 |  |
| 260 | T72_CT_G06 | 72 | 5 |  |
| 234 | T72_CT_B08 | 72 | 5 |  |
| 266 | T72_CT_H05 | 72 | 1 |  |
| 267 | T72_CT_H08 | 72 | 1 |  |
| 242 | T72_CT_C11 | 72 | 1 |  |
