# Supplementary material for: CellTree: an R/bioconductor package to infer the hierarchical structure of cell populations from single-cell RNA-seq data
Source: PubMed Central journal article supplement (PMC5020541; doi:10.1186/s12859-016-1175-6), 2016-09-13
Supplement: 12859_2016_1175_MOESM3_ESM.pdf [file 12859_2016_1175_MOESM3_ESM.pdf]

|    | GO.ID      | Term                                                                                                             | Total | p-Value |
|----|------------|------------------------------------------------------------------------------------------------------------------|-------|---------|
| 1  | GO:0070124 | mitochondrial translational initiation                                                                           | 82    | 1.8e-21 |
| 2  | GO:0070125 | mitochondrial translational elongation                                                                           | 82    | 1.8e-21 |
| 3  | GO:0000398 | mRNA splicing, via spliceosome                                                                                   | 250   | 3.2e-21 |
| 4  | GO:0070126 | mitochondrial translational termination                                                                          | 84    | 2.1e-19 |
| 5  | GO:0051436 | negative regulation of ubiquitin-protein ligase activity involved in mitotic cell cycle                          | 82    | 7.5e-17 |
| 6  | GO:0051437 | positive regulation of ubiquitin-protein ligase activity involved in regulation of mitotic cell cycle transition | 64    | 1.2e-16 |
| 7  | GO:0006521 | regulation of cellular amino acid metabolic process                                                              | 52    | 1.3e-16 |
| 8  | GO:0031145 | anaphase-promoting complex-dependent proteasomal ubiquitin-dependent protein catabolic process                   | 106   | 1.3e-15 |
| 9  | GO:0002479 | antigen processing and presentation of exogenous peptide antigen via MHC class I, TAP-dependent                  | 59    | 2.7e-15 |
| 10 | GO:0006977 | DNA damage response, signal transduction by p53 class mediator resulting in cell cycle arrest                    | 57    | 3.2e-15 |
| 11 | GO:0006120 | mitochondrial electron transport, NADH to ubiquinone                                                             | 40    | 1.6e-14 |
| 12 | GO:0006614 | SRP-dependent cotranslational protein targeting to membrane                                                      | 32    | 3.1e-14 |
| 13 | GO:0038061 | NIK/NF-kappaB signaling                                                                                          | 76    | 1.6e-13 |
| 14 | GO:0016032 | viral process                                                                                                    | 556   | 1.9e-12 |
| 15 | GO:0006412 | translation                                                                                                      | 423   | 2.0e-12 |
| 16 | GO:0051301 | cell division                                                                                                    | 512   | 4.7e-12 |
| 17 | GO:0007067 | mitotic nuclear division                                                                                         | 359   | 1.4e-10 |
| 18 | GO:0019083 | viral transcription                                                                                              | 100   | 1.7e-10 |
| 19 | GO:0043066 | negative regulation of apoptotic process                                                                         | 533   | 2.5e-10 |
| 20 | GO:0006283 | transcription-coupled nucleotide-excision repair                                                                 | 43    | 5.7e-10 |
| 21 | GO:0006446 | regulation of translational initiation                                                                           | 66    | 9.3e-10 |
| 22 | GO:0007264 | small GTPase mediated signal transduction                                                                        | 624   | 1.7e-09 |
| 23 | GO:0006406 | mRNA export from nucleus                                                                                         | 68    | 2.1e-09 |
| 24 | GO:0033209 | tumor necrosis factor-mediated signaling pathway                                                                 | 95    | 2.1e-09 |
| 25 | GO:0022904 | respiratory electron transport chain                                                                             | 104   | 3.4e-09 |
| 26 | GO:0090263 | positive regulation of canonical Wnt signaling pathway                                                           | 89    | 5.4e-09 |
| 27 | GO:0006413 | translational initiation                                                                                         | 173   | 6.9e-09 |
| 28 | GO:0007077 | mitotic nuclear envelope disassembly                                                                             | 40    | 7.8e-09 |
| 29 | GO:0008380 | RNA splicing                                                                                                     | 331   | 1.0e-08 |
| 30 | GO:0016925 | protein sumoylation                                                                                              | 95    | 1.1e-08 |
| 31 | GO:0002223 | stimulatory C-type lectin receptor signaling pathway                                                             | 95    | 1.4e-08 |
| 32 | GO:0006368 | transcription elongation from RNA polymerase II promoter                                                         | 79    | 2.1e-08 |
| 33 | GO:0000086 | G2/M transition of mitotic cell cycle                                                                            | 161   | 2.7e-08 |
| 34 | GO:0007059 | chromosome segregation                                                                                           | 219   | 4.5e-08 |
| 35 | GO:0010827 | regulation of glucose transport                                                                                  | 74    | 4.6e-08 |
| 36 | GO:0000082 | G1/S transition of mitotic cell cycle                                                                            | 208   | 6.0e-08 |
| 37 | GO:0090090 | negative regulation of canonical Wnt signaling pathway                                                           | 103   | 6.1e-08 |
| 38 | GO:0006369 | termination of RNA polymerase II transcription                                                                   | 45    | 1.1e-07 |
| 39 | GO:0042769 | DNA damage response, detection of DNA damage                                                                     | 31    | 1.3e-07 |
| 40 | GO:0000381 | regulation of alternative mRNA splicing, via spliceosome                                                         | 20    | 1.3e-07 |
| 41 | GO:1900034 | regulation of cellular response to heat                                                                          | 63    | 1.4e-07 |
| 42 | GO:0042776 | mitochondrial ATP synthesis coupled proton transport                                                             | 14    | 6.4e-07 |
| 43 | GO:0007265 | Ras protein signal transduction                                                                                  | 367   | 6.9e-07 |
| 44 | GO:0010467 | gene expression                                                                                                  | 3621  | 7.2e-07 |
| 45 | GO:0010499 | proteasomal ubiquitin-independent protein catabolic process                                                      | 20    | 1.5e-06 |
| 46 | GO:0006271 | DNA strand elongation involved in DNA replication                                                                | 35    | 1.6e-06 |
| 47 | GO:0006626 | protein targeting to mitochondrion                                                                               | 118   | 1.7e-06 |

Table 1: **Topic 1** (All terms)

|    | GO.ID      | Term                                                                                            | Total | p-Value |
|----|------------|-------------------------------------------------------------------------------------------------|-------|---------|
| 1  | GO:0000398 | mRNA splicing, via spliceosome                                                                  | 250   | 6.7e-14 |
| 2  | GO:0016032 | viral process                                                                                   | 556   | 1.6e-12 |
| 3  | GO:0002479 | antigen processing and presentation of exogenous peptide antigen via MHC class I, TAP-dependent | 59    | 3.6e-12 |
| 4  | GO:0006120 | mitochondrial electron transport, NADH to ubiquinone                                            | 40    | 7.2e-12 |
| 5  | GO:0006614 | SRP-dependent cotranslational protein targeting to membrane                                     | 32    | 6.9e-11 |
| 6  | GO:0070124 | mitochondrial translational initiation                                                          | 82    | 2.5e-10 |
| 7  | GO:0043066 | negative regulation of apoptotic process                                                        | 533   | 9.9e-10 |
| 8  | GO:0051436 | negative regulation of ubiquitin-protein ligase activity involved in mitotic cell cycle         | 82    | 1.3e-09 |
| 9  | GO:0070125 | mitochondrial translational elongation                                                          | 82    | 2.1e-09 |
| 10 | GO:0006977 | DNA damage response, signal transduction by p53 class mediator resulting in cell cycle arrest   | 57    | 4.2e-09 |
| 11 | GO:0006413 | translational initiation                                                                        | 173   | 5.0e-09 |
| 12 | GO:0070126 | mitochondrial translational termination                                                         | 84    | 6.7e-09 |
| 13 | GO:0090090 | negative regulation of canonical Wnt signaling pathway                                          | 103   | 1.2e-08 |
| 14 | GO:0006521 | regulation of cellular amino acid metabolic process                                             | 52    | 1.3e-08 |
| 15 | GO:0007411 | axon guidance                                                                                   | 336   | 1.8e-08 |
| 16 | GO:0006446 | regulation of translational initiation                                                          | 66    | 2.9e-08 |
| 17 | GO:0006367 | transcription initiation from RNA polymerase II promoter                                        | 204   | 9.9e-08 |
| 18 | GO:0000381 | regulation of alternative mRNA splicing, via spliceosome                                        | 20    | 2.2e-07 |
| 19 | GO:0048010 | vascular endothelial growth factor receptor signaling pathway                                   | 193   | 3.6e-07 |
| 20 | GO:0006368 | transcription elongation from RNA polymerase II promoter                                        | 79    | 4.0e-07 |
| 21 | GO:0038061 | NIK/NF-kappaB signaling                                                                         | 76    | 4.4e-07 |
| 22 | GO:0022904 | respiratory electron transport chain                                                            | 104   | 8.8e-07 |
| 23 | GO:0010499 | proteasomal ubiquitin-independent protein catabolic process                                     | 20    | 1.1e-06 |
| 24 | GO:0006376 | mRNA splice site selection                                                                      | 24    | 1.1e-06 |
| 25 | GO:0031145 | anaphase-promoting complex-dependent proteasomal ubiquitin-dependent protein catabolic process  | 106   | 1.3e-06 |
| 26 | GO:0008286 | insulin receptor signaling pathway                                                              | 230   | 1.5e-06 |
| 27 | GO:0010467 | gene expression                                                                                 | 3621  | 1.7e-06 |

Table 2: [Topic 2](#) (All terms)

|    | GO.ID      | Term                                                                                                             | Total | p-Value |
|----|------------|------------------------------------------------------------------------------------------------------------------|-------|---------|
| 1  | GO:0070125 | mitochondrial translational elongation                                                                           | 82    | 2.0e-21 |
| 2  | GO:0070124 | mitochondrial translational initiation                                                                           | 82    | 1.7e-20 |
| 3  | GO:0070126 | mitochondrial translational termination                                                                          | 84    | 2.0e-19 |
| 4  | GO:0006120 | mitochondrial electron transport, NADH to ubiquinone                                                             | 40    | 5.8e-18 |
| 5  | GO:0006521 | regulation of cellular amino acid metabolic process                                                              | 52    | 5.8e-18 |
| 6  | GO:0051436 | negative regulation of ubiquitin-protein ligase activity involved in mitotic cell cycle                          | 82    | 1.4e-17 |
| 7  | GO:0002479 | antigen processing and presentation of exogenous peptide antigen via MHC class I, TAP-dependent                  | 59    | 2.7e-17 |
| 8  | GO:0000398 | mRNA splicing, via spliceosome                                                                                   | 250   | 1.1e-16 |
| 9  | GO:0006977 | DNA damage response, signal transduction by p53 class mediator resulting in cell cycle arrest                    | 57    | 1.4e-15 |
| 10 | GO:0031145 | anaphase-promoting complex-dependent proteasomal ubiquitin-dependent protein catabolic process                   | 106   | 1.1e-14 |
| 11 | GO:0038061 | NIK/NF-kappaB signaling                                                                                          | 76    | 2.4e-14 |
| 12 | GO:0006614 | SRP-dependent cotranslational protein targeting to membrane                                                      | 32    | 3.3e-14 |
| 13 | GO:0051437 | positive regulation of ubiquitin-protein ligase activity involved in regulation of mitotic cell cycle transition | 64    | 6.6e-13 |
| 14 | GO:0016032 | viral process                                                                                                    | 556   | 2.2e-12 |
| 15 | GO:0006446 | regulation of translational initiation                                                                           | 66    | 5.3e-11 |
| 16 | GO:0007265 | Ras protein signal transduction                                                                                  | 367   | 1.0e-10 |
| 17 | GO:0022904 | respiratory electron transport chain                                                                             | 104   | 4.0e-10 |
| 18 | GO:0090263 | positive regulation of canonical Wnt signaling pathway                                                           | 89    | 5.8e-10 |
| 19 | GO:0033209 | tumor necrosis factor-mediated signaling pathway                                                                 | 95    | 1.1e-09 |
| 20 | GO:0006412 | translation                                                                                                      | 423   | 4.0e-09 |
| 21 | GO:0043066 | negative regulation of apoptotic process                                                                         | 533   | 4.6e-09 |
| 22 | GO:0002223 | stimulatory C-type lectin receptor signaling pathway                                                             | 95    | 4.9e-09 |
| 23 | GO:0010467 | gene expression                                                                                                  | 3621  | 6.7e-09 |
| 24 | GO:0030049 | muscle filament sliding                                                                                          | 29    | 2.5e-08 |
| 25 | GO:0042776 | mitochondrial ATP synthesis coupled proton transport                                                             | 14    | 2.6e-08 |
| 26 | GO:0090090 | negative regulation of canonical Wnt signaling pathway                                                           | 103   | 3.1e-08 |
| 27 | GO:0006413 | translational initiation                                                                                         | 173   | 6.9e-08 |
| 28 | GO:0006368 | transcription elongation from RNA polymerase II promoter                                                         | 79    | 8.9e-08 |
| 29 | GO:0007411 | axon guidance                                                                                                    | 336   | 1.1e-07 |
| 30 | GO:0008286 | insulin receptor signaling pathway                                                                               | 230   | 1.1e-07 |
| 31 | GO:0048010 | vascular endothelial growth factor receptor signaling pathway                                                    | 193   | 1.9e-07 |
| 32 | GO:0051084 | 'de novo' posttranslational protein folding                                                                      | 41    | 3.6e-07 |
| 33 | GO:0000381 | regulation of alternative mRNA splicing, via spliceosome                                                         | 20    | 4.0e-07 |
| 34 | GO:0010499 | proteasomal ubiquitin-independent protein catabolic process                                                      | 20    | 5.5e-07 |
| 35 | GO:0017148 | negative regulation of translation                                                                               | 76    | 1.1e-06 |
| 36 | GO:0006406 | mRNA export from nucleus                                                                                         | 68    | 1.4e-06 |
| 37 | GO:0001731 | formation of translation preinitiation complex                                                                   | 16    | 1.7e-06 |
| 38 | GO:0000186 | activation of MAPKK activity                                                                                     | 154   | 1.8e-06 |

Table 3: [Topic 3](#) (All terms)

|    | GO.ID      | Term                                                                                            | Total | p-Value |
|----|------------|-------------------------------------------------------------------------------------------------|-------|---------|
| 1  | GO:0007411 | axon guidance                                                                                   | 336   | 5.8e-12 |
| 2  | GO:0006614 | SRP-dependent cotranslational protein targeting to membrane                                     | 32    | 2.2e-10 |
| 3  | GO:0016032 | viral process                                                                                   | 556   | 2.0e-09 |
| 4  | GO:0006977 | DNA damage response, signal transduction by p53 class mediator resulting in cell cycle arrest   | 57    | 6.8e-09 |
| 5  | GO:0002479 | antigen processing and presentation of exogenous peptide antigen via MHC class I, TAP-dependent | 59    | 1.1e-08 |
| 6  | GO:0043066 | negative regulation of apoptotic process                                                        | 533   | 1.1e-07 |
| 7  | GO:0006521 | regulation of cellular amino acid metabolic process                                             | 52    | 5.1e-07 |
| 8  | GO:0000398 | mRNA splicing, via spliceosome                                                                  | 250   | 6.4e-07 |
| 9  | GO:0006120 | mitochondrial electron transport, NADH to ubiquinone                                            | 40    | 6.8e-07 |
| 10 | GO:0006886 | intracellular protein transport                                                                 | 742   | 9.6e-07 |
| 11 | GO:0007265 | Ras protein signal transduction                                                                 | 367   | 1.4e-06 |

Table 4: [Topic 4](#) (All terms)

|    | GO.ID      | Term                                                                                                             | Total | p-Value |
|----|------------|------------------------------------------------------------------------------------------------------------------|-------|---------|
| 1  | GO:0070125 | mitochondrial translational elongation                                                                           | 82    | 1.0e-26 |
| 2  | GO:0070124 | mitochondrial translational initiation                                                                           | 82    | 1.1e-25 |
| 3  | GO:0070126 | mitochondrial translational termination                                                                          | 84    | 1.8e-23 |
| 4  | GO:0006120 | mitochondrial electron transport, NADH to ubiquinone                                                             | 40    | 2.0e-19 |
| 5  | GO:0002479 | antigen processing and presentation of exogenous peptide antigen via MHC class I, TAP-dependent                  | 59    | 7.5e-19 |
| 6  | GO:0006521 | regulation of cellular amino acid metabolic process                                                              | 52    | 1.3e-18 |
| 7  | GO:0006977 | DNA damage response, signal transduction by p53 class mediator resulting in cell cycle arrest                    | 57    | 7.0e-18 |
| 8  | GO:0051436 | negative regulation of ubiquitin-protein ligase activity involved in mitotic cell cycle                          | 82    | 7.7e-18 |
| 9  | GO:0006614 | SRP-dependent cotranslational protein targeting to membrane                                                      | 32    | 1.3e-17 |
| 10 | GO:0000398 | mRNA splicing, via spliceosome                                                                                   | 250   | 3.9e-15 |
| 11 | GO:0038061 | NIK/NF-kappaB signaling                                                                                          | 76    | 1.8e-14 |
| 12 | GO:0043066 | negative regulation of apoptotic process                                                                         | 533   | 6.0e-14 |
| 13 | GO:0016032 | viral process                                                                                                    | 556   | 7.5e-14 |
| 14 | GO:0031145 | anaphase-promoting complex-dependent proteasomal ubiquitin-dependent protein catabolic process                   | 106   | 9.4e-14 |
| 15 | GO:0051437 | positive regulation of ubiquitin-protein ligase activity involved in regulation of mitotic cell cycle transition | 64    | 7.5e-13 |
| 16 | GO:0090263 | positive regulation of canonical Wnt signaling pathway                                                           | 89    | 2.5e-11 |
| 17 | GO:0022904 | respiratory electron transport chain                                                                             | 104   | 7.9e-11 |
| 18 | GO:0006446 | regulation of translational initiation                                                                           | 66    | 2.6e-10 |
| 19 | GO:0033209 | tumor necrosis factor-mediated signaling pathway                                                                 | 95    | 8.3e-10 |
| 20 | GO:0007265 | Ras protein signal transduction                                                                                  | 367   | 1.4e-09 |
| 21 | GO:0006368 | transcription elongation from RNA polymerase II promoter                                                         | 79    | 2.4e-09 |
| 22 | GO:0010467 | gene expression                                                                                                  | 3621  | 3.2e-09 |
| 23 | GO:0002223 | stimulatory C-type lectin receptor signaling pathway                                                             | 95    | 3.5e-09 |
| 24 | GO:0090090 | negative regulation of canonical Wnt signaling pathway                                                           | 103   | 2.5e-08 |
| 25 | GO:0006412 | translation                                                                                                      | 423   | 3.3e-08 |
| 26 | GO:0042776 | mitochondrial ATP synthesis coupled proton transport                                                             | 14    | 7.2e-08 |
| 27 | GO:0006413 | translational initiation                                                                                         | 173   | 2.0e-07 |
| 28 | GO:0010499 | proteasomal ubiquitin-independent protein catabolic process                                                      | 20    | 3.0e-07 |
| 29 | GO:0050434 | positive regulation of viral transcription                                                                       | 49    | 3.0e-07 |
| 30 | GO:0051084 | 'de novo' posttranslational protein folding                                                                      | 41    | 3.3e-07 |
| 31 | GO:0006370 | 7-methylguanosine mRNA capping                                                                                   | 30    | 4.3e-07 |
| 32 | GO:0044267 | cellular protein metabolic process                                                                               | 3243  | 4.7e-07 |
| 33 | GO:0001731 | formation of translation preinitiation complex                                                                   | 16    | 7.0e-07 |
| 34 | GO:0007411 | axon guidance                                                                                                    | 336   | 1.5e-06 |
| 35 | GO:0006406 | mRNA export from nucleus                                                                                         | 68    | 1.6e-06 |
| 36 | GO:0006457 | protein folding                                                                                                  | 184   | 1.6e-06 |

Table 5: [Topic 5](#) (All terms)

|    | GO.ID      | Term                                                                                                             | Total | p-Value |
|----|------------|------------------------------------------------------------------------------------------------------------------|-------|---------|
| 6  | GO:0051437 | positive regulation of ubiquitin-protein ligase activity involved in regulation of mitotic cell cycle transition | 64    | 1.2e-16 |
| 15 | GO:0006412 | translation                                                                                                      | 423   | 2.0e-12 |
| 16 | GO:0051301 | cell division                                                                                                    | 512   | 4.7e-12 |
| 17 | GO:0007067 | mitotic nuclear division                                                                                         | 359   | 1.4e-10 |
| 18 | GO:0019083 | viral transcription                                                                                              | 100   | 1.7e-10 |
| 20 | GO:0006283 | transcription-coupled nucleotide-excision repair                                                                 | 43    | 5.7e-10 |
| 22 | GO:0007264 | small GTPase mediated signal transduction                                                                        | 624   | 1.7e-09 |
| 23 | GO:0006406 | mRNA export from nucleus                                                                                         | 68    | 2.1e-09 |
| 24 | GO:0033209 | tumor necrosis factor-mediated signaling pathway                                                                 | 95    | 2.1e-09 |
| 26 | GO:0090263 | positive regulation of canonical Wnt signaling pathway                                                           | 89    | 5.4e-09 |
| 28 | GO:0007077 | mitotic nuclear envelope disassembly                                                                             | 40    | 7.8e-09 |
| 29 | GO:0008380 | RNA splicing                                                                                                     | 331   | 1.0e-08 |
| 30 | GO:0016925 | protein sumoylation                                                                                              | 95    | 1.1e-08 |
| 31 | GO:0002223 | stimulatory C-type lectin receptor signaling pathway                                                             | 95    | 1.4e-08 |
| 33 | GO:0000086 | G2/M transition of mitotic cell cycle                                                                            | 161   | 2.7e-08 |
| 34 | GO:0007059 | chromosome segregation                                                                                           | 219   | 4.5e-08 |
| 35 | GO:0010827 | regulation of glucose transport                                                                                  | 74    | 4.6e-08 |
| 36 | GO:0000082 | G1/S transition of mitotic cell cycle                                                                            | 208   | 6.0e-08 |
| 38 | GO:0006369 | termination of RNA polymerase II transcription                                                                   | 45    | 1.1e-07 |
| 39 | GO:0042769 | DNA damage response, detection of DNA damage                                                                     | 31    | 1.3e-07 |
| 40 | GO:0000381 | regulation of alternative mRNA splicing, via spliceosome                                                         | 20    | 1.3e-07 |
| 41 | GO:1900034 | regulation of cellular response to heat                                                                          | 63    | 1.4e-07 |
| 42 | GO:0042776 | mitochondrial ATP synthesis coupled proton transport                                                             | 14    | 6.4e-07 |
| 46 | GO:0006271 | DNA strand elongation involved in DNA replication                                                                | 35    | 1.6e-06 |
| 47 | GO:0006626 | protein targeting to mitochondrion                                                                               | 118   | 1.7e-06 |

Table 6: **Topic 1** (Terms that appear in less than half of other topics)

|    | GO.ID      | Term                                                          | Total | p-Value |
|----|------------|---------------------------------------------------------------|-------|---------|
| 17 | GO:0006367 | transcription initiation from RNA polymerase II promoter      | 204   | 9.9e-08 |
| 18 | GO:0000381 | regulation of alternative mRNA splicing, via spliceosome      | 20    | 2.2e-07 |
| 19 | GO:0048010 | vascular endothelial growth factor receptor signaling pathway | 193   | 3.6e-07 |
| 24 | GO:0006376 | mRNA splice site selection                                    | 24    | 1.1e-06 |
| 26 | GO:0008286 | insulin receptor signaling pathway                            | 230   | 1.5e-06 |

Table 7: **Topic 2** (Terms that appear in less than half of other topics)

|    | GO.ID      | Term                                                                                                             | Total | p-Value |
|----|------------|------------------------------------------------------------------------------------------------------------------|-------|---------|
| 13 | GO:0051437 | positive regulation of ubiquitin-protein ligase activity involved in regulation of mitotic cell cycle transition | 64    | 6.6e-13 |
| 18 | GO:0090263 | positive regulation of canonical Wnt signaling pathway                                                           | 89    | 5.8e-10 |
| 19 | GO:0033209 | tumor necrosis factor-mediated signaling pathway                                                                 | 95    | 1.1e-09 |
| 20 | GO:0006412 | translation                                                                                                      | 423   | 4.0e-09 |
| 22 | GO:0002223 | stimulatory C-type lectin receptor signaling pathway                                                             | 95    | 4.9e-09 |
| 24 | GO:0030049 | muscle filament sliding                                                                                          | 29    | 2.5e-08 |
| 25 | GO:0042776 | mitochondrial ATP synthesis coupled proton transport                                                             | 14    | 2.6e-08 |
| 30 | GO:0008286 | insulin receptor signaling pathway                                                                               | 230   | 1.1e-07 |
| 31 | GO:0048010 | vascular endothelial growth factor receptor signaling pathway                                                    | 193   | 1.9e-07 |
| 32 | GO:0051084 | 'de novo' posttranslational protein folding                                                                      | 41    | 3.6e-07 |
| 33 | GO:0000381 | regulation of alternative mRNA splicing, via spliceosome                                                         | 20    | 4.0e-07 |
| 35 | GO:0017148 | negative regulation of translation                                                                               | 76    | 1.1e-06 |
| 36 | GO:0006406 | mRNA export from nucleus                                                                                         | 68    | 1.4e-06 |
| 37 | GO:0001731 | formation of translation preinitiation complex                                                                   | 16    | 1.7e-06 |
| 38 | GO:0000186 | activation of MAPKK activity                                                                                     | 154   | 1.8e-06 |

Table 8: **Topic 3** (Terms that appear in less than half of other topics)

|    | GO.ID      | Term                            | Total | p-Value |
|----|------------|---------------------------------|-------|---------|
| 10 | GO:0006886 | intracellular protein transport | 742   | 9.6e-07 |

Table 9: **Topic 4** (Terms that appear in less than half of other topics)

|    | GO.ID      | Term                                                                                                             | Total | p-Value |
|----|------------|------------------------------------------------------------------------------------------------------------------|-------|---------|
| 15 | GO:0051437 | positive regulation of ubiquitin-protein ligase activity involved in regulation of mitotic cell cycle transition | 64    | 7.5e-13 |
| 16 | GO:0090263 | positive regulation of canonical Wnt signaling pathway                                                           | 89    | 2.5e-11 |
| 19 | GO:0033209 | tumor necrosis factor-mediated signaling pathway                                                                 | 95    | 8.3e-10 |
| 23 | GO:0002223 | stimulatory C-type lectin receptor signaling pathway                                                             | 95    | 3.5e-09 |
| 25 | GO:0006412 | translation                                                                                                      | 423   | 3.3e-08 |
| 26 | GO:0042776 | mitochondrial ATP synthesis coupled proton transport                                                             | 14    | 7.2e-08 |
| 29 | GO:0050434 | positive regulation of viral transcription                                                                       | 49    | 3.0e-07 |
| 30 | GO:0051084 | 'de novo' posttranslational protein folding                                                                      | 41    | 3.3e-07 |
| 31 | GO:0006370 | 7-methylguanosine mRNA capping                                                                                   | 30    | 4.3e-07 |
| 32 | GO:0044267 | cellular protein metabolic process                                                                               | 3243  | 4.7e-07 |
| 33 | GO:0001731 | formation of translation preinitiation complex                                                                   | 16    | 7.0e-07 |
| 35 | GO:0006406 | mRNA export from nucleus                                                                                         | 68    | 1.6e-06 |
| 36 | GO:0006457 | protein folding                                                                                                  | 184   | 1.6e-06 |

Table 10: **Topic 5** (Terms that appear in less than half of other topics)



|    | GO.ID      | Term                                              | Total | p-Value |
|----|------------|---------------------------------------------------|-------|---------|
| 16 | GO:0051301 | cell division                                     | 512   | 4.7e-12 |
| 17 | GO:0007067 | mitotic nuclear division                          | 359   | 1.4e-10 |
| 18 | GO:0019083 | viral transcription                               | 100   | 1.7e-10 |
| 20 | GO:0006283 | transcription-coupled nucleotide-excision repair  | 43    | 5.7e-10 |
| 22 | GO:0007264 | small GTPase mediated signal transduction         | 624   | 1.7e-09 |
| 28 | GO:0007077 | mitotic nuclear envelope disassembly              | 40    | 7.8e-09 |
| 29 | GO:0008380 | RNA splicing                                      | 331   | 1.0e-08 |
| 30 | GO:0016925 | protein sumoylation                               | 95    | 1.1e-08 |
| 33 | GO:0000086 | G2/M transition of mitotic cell cycle             | 161   | 2.7e-08 |
| 34 | GO:0007059 | chromosome segregation                            | 219   | 4.5e-08 |
| 35 | GO:0010827 | regulation of glucose transport                   | 74    | 4.6e-08 |
| 36 | GO:0000082 | G1/S transition of mitotic cell cycle             | 208   | 6.0e-08 |
| 38 | GO:0006369 | termination of RNA polymerase II transcription    | 45    | 1.1e-07 |
| 39 | GO:0042769 | DNA damage response, detection of DNA damage      | 31    | 1.3e-07 |
| 41 | GO:1900034 | regulation of cellular response to heat           | 63    | 1.4e-07 |
| 46 | GO:0006271 | DNA strand elongation involved in DNA replication | 35    | 1.6e-06 |
| 47 | GO:0006626 | protein targeting to mitochondrion                | 118   | 1.7e-06 |

Table 11: **Topic 1** (Terms that only appear in this topic)

|    | GO.ID      | Term                                                     | Total | p-Value |
|----|------------|----------------------------------------------------------|-------|---------|
| 17 | GO:0006367 | transcription initiation from RNA polymerase II promoter | 204   | 9.9e-08 |
| 24 | GO:0006376 | mRNA splice site selection                               | 24    | 1.1e-06 |

Table 12: **Topic 2** (Terms that only appear in this topic)

|    | GO.ID      | Term                               | Total | p-Value |
|----|------------|------------------------------------|-------|---------|
| 24 | GO:0030049 | muscle filament sliding            | 29    | 2.5e-08 |
| 35 | GO:0017148 | negative regulation of translation | 76    | 1.1e-06 |
| 38 | GO:0000186 | activation of MAPKK activity       | 154   | 1.8e-06 |

Table 13: **Topic 3** (Terms that only appear in this topic)

|    | GO.ID      | Term                            | Total | p-Value |
|----|------------|---------------------------------|-------|---------|
| 10 | GO:0006886 | intracellular protein transport | 742   | 9.6e-07 |

Table 14: **Topic 4** (Terms that only appear in this topic)

|    | GO.ID      | Term                                       | Total | p-Value |
|----|------------|--------------------------------------------|-------|---------|
| 29 | GO:0050434 | positive regulation of viral transcription | 49    | 3.0e-07 |
| 31 | GO:0006370 | 7-methylguanosine mRNA capping             | 30    | 4.3e-07 |
| 32 | GO:0044267 | cellular protein metabolic process         | 3243  | 4.7e-07 |
| 36 | GO:0006457 | protein folding                            | 184   | 1.6e-06 |

Table 15: **Topic 5** (Terms that only appear in this topic)
