# Supplementary material for: CellTree: an R/bioconductor package to infer the hierarchical structure of cell populations from single-cell RNA-seq data
Source: PubMed Central journal article supplement (PMC5020541; doi:10.1186/s12859-016-1175-6), 2016-09-13
Supplement: 12859_2016_1175_MOESM4_ESM.pdf [file 12859_2016_1175_MOESM4_ESM.pdf]

|    | GO.ID      | Term                                                   | Total | p-Value |
|----|------------|--------------------------------------------------------|-------|---------|
| 1  | GO:0070062 | extracellular exosome                                  | 1736  | < 1e-30 |
| 2  | GO:0005654 | nucleoplasm                                            | 2397  | < 1e-30 |
| 3  | GO:0005829 | cytosol                                                | 2245  | 7.3e-24 |
| 4  | GO:0005730 | nucleolus                                              | 696   | 1.8e-22 |
| 5  | GO:0016020 | membrane                                               | 4667  | 6.1e-20 |
| 6  | GO:0005747 | mitochondrial respiratory chain complex I              | 40    | 7.3e-17 |
| 7  | GO:0005737 | cytoplasm                                              | 6973  | 2.9e-16 |
| 8  | GO:0071013 | catalytic step 2 spliceosome                           | 81    | 3.4e-16 |
| 9  | GO:0043209 | myelin sheath                                          | 122   | 9.9e-14 |
| 10 | GO:0043234 | protein complex                                        | 2881  | 8.3e-13 |
| 11 | GO:0005743 | mitochondrial inner membrane                           | 393   | 1.5e-11 |
| 12 | GO:0000777 | condensed chromosome kinetochore                       | 89    | 1.1e-10 |
| 13 | GO:0016607 | nuclear speck                                          | 171   | 1.3e-10 |
| 14 | GO:0005763 | mitochondrial small ribosomal subunit                  | 24    | 4.1e-10 |
| 15 | GO:0005925 | focal adhesion                                         | 302   | 3.0e-09 |
| 16 | GO:0030529 | ribonucleoprotein complex                              | 542   | 4.4e-08 |
| 17 | GO:0005840 | ribosome                                               | 126   | 5.3e-08 |
| 18 | GO:0005681 | spliceosomal complex                                   | 162   | 6.2e-08 |
| 19 | GO:0005839 | proteasome core complex                                | 17    | 7.0e-08 |
| 20 | GO:0005643 | nuclear pore                                           | 61    | 8.9e-08 |
| 21 | GO:0010494 | cytoplasmic stress granule                             | 28    | 1.6e-07 |
| 22 | GO:0005753 | mitochondrial proton-transporting ATP synthase complex | 17    | 2.2e-07 |
| 23 | GO:0005852 | eukaryotic translation initiation factor 3 complex     | 15    | 4.6e-07 |
| 24 | GO:0008540 | proteasome regulatory particle, base subcomplex        | 12    | 5.5e-07 |
| 25 | GO:0042470 | melanosome                                             | 79    | 1.0e-06 |
| 26 | GO:0005813 | centrosome                                             | 400   | 1.4e-06 |
| 27 | GO:0033290 | eukaryotic 48S preinitiation complex                   | 14    | 1.8e-06 |
| 28 | GO:0000922 | spindle pole                                           | 105   | 2.2e-06 |
| 29 | GO:0005832 | chaperonin-containing T-complex                        | 9     | 3.3e-06 |
| 30 | GO:0005876 | spindle microtubule                                    | 49    | 3.4e-06 |
| 31 | GO:0071011 | precatalytic spliceosome                               | 21    | 3.6e-06 |
| 32 | GO:0005762 | mitochondrial large ribosomal subunit                  | 32    | 4.6e-06 |
| 33 | GO:0005689 | U12-type spliceosomal complex                          | 25    | 4.8e-06 |
| 34 | GO:0005688 | U6 snRNP                                               | 8     | 5.7e-06 |
| 35 | GO:0005686 | U2 snRNP                                               | 16    | 7.8e-06 |
| 36 | GO:0000940 | condensed chromosome outer kinetochore                 | 13    | 9.5e-06 |
| 37 | GO:0005759 | mitochondrial matrix                                   | 324   | 1.1e-05 |
| 38 | GO:0031597 | cytosolic proteasome complex                           | 11    | 1.2e-05 |
| 39 | GO:0005758 | mitochondrial intermembrane space                      | 63    | 1.2e-05 |
| 40 | GO:0000784 | nuclear chromosome, telomeric region                   | 63    | 1.2e-05 |
| 41 | GO:0046540 | U4/U6 x U5 tri-snRNP complex                           | 16    | 1.3e-05 |

Table 1: **Topic 1** (All terms)

|    | GO.ID      | Term                                                   | Total | p-Value |
|----|------------|--------------------------------------------------------|-------|---------|
| 1  | GO:0070062 | extracellular exosome                                  | 1736  | < 1e-30 |
| 2  | GO:0005925 | focal adhesion                                         | 302   | 6.1e-15 |
| 3  | GO:0005747 | mitochondrial respiratory chain complex I              | 40    | 2.7e-13 |
| 4  | GO:0005829 | cytosol                                                | 2245  | 4.3e-11 |
| 5  | GO:0016020 | membrane                                               | 4667  | 1.6e-10 |
| 6  | GO:0071013 | catalytic step 2 spliceosome                           | 81    | 3.3e-10 |
| 7  | GO:0043209 | myelin sheath                                          | 122   | 7.7e-10 |
| 8  | GO:0005654 | nucleoplasm                                            | 2397  | 1.6e-08 |
| 9  | GO:0016607 | nuclear speck                                          | 171   | 4.6e-08 |
| 10 | GO:0010494 | cytoplasmic stress granule                             | 28    | 2.7e-07 |
| 11 | GO:0005839 | proteasome core complex                                | 17    | 2.9e-07 |
| 12 | GO:0005753 | mitochondrial proton-transporting ATP synthase complex | 17    | 5.2e-07 |
| 13 | GO:0042470 | melanosome                                             | 79    | 1.2e-06 |
| 14 | GO:0005852 | eukaryotic translation initiation factor 3 complex     | 15    | 1.6e-06 |
| 15 | GO:0005665 | DNA-directed RNA polymerase II, core complex           | 15    | 5.1e-06 |
| 16 | GO:0033290 | eukaryotic 48S preinitiation complex                   | 14    | 6.7e-06 |
| 17 | GO:0005763 | mitochondrial small ribosomal subunit                  | 24    | 1.2e-05 |
| 18 | GO:0005737 | cytoplasm                                              | 6973  | 1.3e-05 |

Table 2: [Topic 2](#) (All terms)

|    | GO.ID      | Term                                                   | Total | p-Value |
|----|------------|--------------------------------------------------------|-------|---------|
| 1  | GO:0070062 | extracellular exosome                                  | 1736  | < 1e-30 |
| 2  | GO:0005747 | mitochondrial respiratory chain complex I              | 40    | 1.5e-20 |
| 3  | GO:0005829 | cytosol                                                | 2245  | 6.8e-20 |
| 4  | GO:0071013 | catalytic step 2 spliceosome                           | 81    | 1.4e-16 |
| 5  | GO:0043209 | myelin sheath                                          | 122   | 6.4e-16 |
| 6  | GO:0016020 | membrane                                               | 4667  | 7.6e-14 |
| 7  | GO:0005925 | focal adhesion                                         | 302   | 2.4e-13 |
| 8  | GO:0005730 | nucleolus                                              | 696   | 5.7e-12 |
| 9  | GO:0005737 | cytoplasm                                              | 6973  | 1.9e-11 |
| 10 | GO:0005743 | mitochondrial inner membrane                           | 393   | 2.9e-11 |
| 11 | GO:0005763 | mitochondrial small ribosomal subunit                  | 24    | 1.6e-09 |
| 12 | GO:0016607 | nuclear speck                                          | 171   | 4.6e-09 |
| 13 | GO:0030529 | ribonucleoprotein complex                              | 542   | 6.4e-09 |
| 14 | GO:0042470 | melanosome                                             | 79    | 1.0e-08 |
| 15 | GO:0010494 | cytoplasmic stress granule                             | 28    | 1.2e-08 |
| 16 | GO:0005839 | proteasome core complex                                | 17    | 2.7e-08 |
| 17 | GO:0005753 | mitochondrial proton-transporting ATP synthase complex | 17    | 6.3e-08 |
| 18 | GO:0001725 | stress fiber                                           | 37    | 1.7e-07 |
| 19 | GO:0005654 | nucleoplasm                                            | 2397  | 2.1e-07 |
| 20 | GO:0008540 | proteasome regulatory particle, base subcomplex        | 12    | 3.1e-07 |
| 21 | GO:0030018 | Z disc                                                 | 77    | 3.1e-07 |
| 22 | GO:0005852 | eukaryotic translation initiation factor 3 complex     | 15    | 4.0e-07 |
| 23 | GO:0005746 | mitochondrial respiratory chain                        | 62    | 8.4e-07 |
| 24 | GO:0033290 | eukaryotic 48S preinitiation complex                   | 14    | 8.8e-07 |
| 25 | GO:0098796 | membrane protein complex                               | 634   | 1.2e-06 |
| 26 | GO:0098800 | inner mitochondrial membrane protein complex           | 91    | 1.3e-06 |
| 27 | GO:0043234 | protein complex                                        | 2881  | 1.3e-06 |
| 28 | GO:0005762 | mitochondrial large ribosomal subunit                  | 32    | 1.5e-06 |
| 29 | GO:0071011 | precatalytic spliceosome                               | 21    | 2.4e-06 |
| 30 | GO:0000932 | cytoplasmic mRNA processing body                       | 59    | 2.9e-06 |
| 31 | GO:0005793 | endoplasmic reticulum-Golgi intermediate compartment   | 66    | 3.1e-06 |
| 32 | GO:0005832 | chaperonin-containing T-complex                        | 9     | 3.8e-06 |
| 33 | GO:0031597 | cytosolic proteasome complex                           | 11    | 4.3e-06 |
| 34 | GO:0005840 | ribosome                                               | 126   | 6.9e-06 |
| 35 | GO:0005758 | mitochondrial intermembrane space                      | 63    | 8.6e-06 |
| 36 | GO:0005686 | U2 snRNP                                               | 16    | 9.1e-06 |
| 37 | GO:0005681 | spliceosomal complex                                   | 162   | 1.2e-05 |
| 38 | GO:0016282 | eukaryotic 43S preinitiation complex                   | 14    | 1.3e-05 |

Table 3: [Topic 3](#) (All terms)

|    | GO.ID      | Term                                               | Total | p-Value |
|----|------------|----------------------------------------------------|-------|---------|
| 1  | GO:0070062 | extracellular exosome                              | 1736  | < 1e-30 |
| 2  | GO:0005925 | focal adhesion                                     | 302   | 8.9e-13 |
| 3  | GO:0005829 | cytosol                                            | 2245  | 3.1e-10 |
| 4  | GO:0016020 | membrane                                           | 4667  | 1.3e-08 |
| 5  | GO:0005747 | mitochondrial respiratory chain complex I          | 40    | 2.0e-08 |
| 6  | GO:0005654 | nucleoplasm                                        | 2397  | 2.2e-08 |
| 7  | GO:0005737 | cytoplasm                                          | 6973  | 3.0e-08 |
| 8  | GO:0016607 | nuclear speck                                      | 171   | 4.8e-08 |
| 9  | GO:0071013 | catalytic step 2 spliceosome                       | 81    | 5.6e-07 |
| 10 | GO:0010494 | cytoplasmic stress granule                         | 28    | 1.8e-06 |
| 11 | GO:0043209 | myelin sheath                                      | 122   | 2.2e-06 |
| 12 | GO:0005852 | eukaryotic translation initiation factor 3 complex | 15    | 6.0e-06 |
| 13 | GO:0005604 | basement membrane                                  | 58    | 1.0e-05 |

Table 4: [Topic 4](#) (All terms)

|    | GO.ID      | Term                                                   | Total | p-Value |
|----|------------|--------------------------------------------------------|-------|---------|
| 1  | GO:0070062 | extracellular exosome                                  | 1736  | < 1e-30 |
| 2  | GO:0005829 | cytosol                                                | 2245  | 3.8e-22 |
| 3  | GO:0005747 | mitochondrial respiratory chain complex I              | 40    | 4.0e-22 |
| 4  | GO:0043209 | myelin sheath                                          | 122   | 2.7e-19 |
| 5  | GO:0005743 | mitochondrial inner membrane                           | 393   | 4.0e-17 |
| 6  | GO:0016020 | membrane                                               | 4667  | 9.9e-16 |
| 7  | GO:0005925 | focal adhesion                                         | 302   | 2.8e-13 |
| 8  | GO:0071013 | catalytic step 2 spliceosome                           | 81    | 2.0e-12 |
| 9  | GO:0005730 | nucleolus                                              | 696   | 1.2e-11 |
| 10 | GO:0005840 | ribosome                                               | 126   | 7.9e-10 |
| 11 | GO:0005737 | cytoplasm                                              | 6973  | 1.1e-09 |
| 12 | GO:0005763 | mitochondrial small ribosomal subunit                  | 24    | 1.3e-09 |
| 13 | GO:0005839 | proteasome core complex                                | 17    | 9.0e-09 |
| 14 | GO:0042470 | melanosome                                             | 79    | 1.4e-08 |
| 15 | GO:0005654 | nucleoplasm                                            | 2397  | 6.1e-08 |
| 16 | GO:0005762 | mitochondrial large ribosomal subunit                  | 32    | 7.5e-08 |
| 17 | GO:0016607 | nuclear speck                                          | 171   | 8.6e-08 |
| 18 | GO:0005753 | mitochondrial proton-transporting ATP synthase complex | 17    | 1.4e-07 |
| 19 | GO:0005643 | nuclear pore                                           | 61    | 1.5e-07 |
| 20 | GO:0005852 | eukaryotic translation initiation factor 3 complex     | 15    | 1.9e-07 |
| 21 | GO:0030529 | ribonucleoprotein complex                              | 542   | 2.8e-07 |
| 22 | GO:0033290 | eukaryotic 48S preinitiation complex                   | 14    | 7.0e-07 |
| 23 | GO:0008540 | proteasome regulatory particle, base subcomplex        | 12    | 7.0e-07 |
| 24 | GO:0043234 | protein complex                                        | 2881  | 9.6e-07 |
| 25 | GO:0010494 | cytoplasmic stress granule                             | 28    | 2.0e-06 |
| 26 | GO:0005789 | endoplasmic reticulum membrane                         | 628   | 2.4e-06 |
| 27 | GO:0098796 | membrane protein complex                               | 634   | 5.3e-06 |
| 28 | GO:0005746 | mitochondrial respiratory chain                        | 62    | 5.3e-06 |
| 29 | GO:0005793 | endoplasmic reticulum-Golgi intermediate compartment   | 66    | 7.5e-06 |
| 30 | GO:0031597 | cytosolic proteasome complex                           | 11    | 8.6e-06 |
| 31 | GO:0005832 | chaperonin-containing T-complex                        | 9     | 8.7e-06 |
| 32 | GO:0005758 | mitochondrial intermembrane space                      | 63    | 9.4e-06 |
| 33 | GO:0016282 | eukaryotic 43S preinitiation complex                   | 14    | 1.1e-05 |
| 34 | GO:0005885 | Arp2/3 protein complex                                 | 10    | 1.3e-05 |

Table 5: [Topic 5](#) (All terms)

|    | GO.ID      | Term                                            | Total | p-Value |
|----|------------|-------------------------------------------------|-------|---------|
| 4  | GO:0005730 | nucleolus                                       | 696   | 1.8e-22 |
| 10 | GO:0043234 | protein complex                                 | 2881  | 8.3e-13 |
| 11 | GO:0005743 | mitochondrial inner membrane                    | 393   | 1.5e-11 |
| 12 | GO:0000777 | condensed chromosome kinetochore                | 89    | 1.1e-10 |
| 16 | GO:0030529 | ribonucleoprotein complex                       | 542   | 4.4e-08 |
| 17 | GO:0005840 | ribosome                                        | 126   | 5.3e-08 |
| 18 | GO:0005681 | spliceosomal complex                            | 162   | 6.2e-08 |
| 20 | GO:0005643 | nuclear pore                                    | 61    | 8.9e-08 |
| 24 | GO:0008540 | proteasome regulatory particle, base subcomplex | 12    | 5.5e-07 |
| 26 | GO:0005813 | centrosome                                      | 400   | 1.4e-06 |
| 28 | GO:0000922 | spindle pole                                    | 105   | 2.2e-06 |
| 29 | GO:0005832 | chaperonin-containing T-complex                 | 9     | 3.3e-06 |
| 30 | GO:0005876 | spindle microtubule                             | 49    | 3.4e-06 |
| 31 | GO:0071011 | precatalytic spliceosome                        | 21    | 3.6e-06 |
| 32 | GO:0005762 | mitochondrial large ribosomal subunit           | 32    | 4.6e-06 |
| 33 | GO:0005689 | U12-type spliceosomal complex                   | 25    | 4.8e-06 |
| 34 | GO:0005688 | U6 snRNP                                        | 8     | 5.7e-06 |
| 35 | GO:0005686 | U2 snRNP                                        | 16    | 7.8e-06 |
| 36 | GO:0000940 | condensed chromosome outer kinetochore          | 13    | 9.5e-06 |
| 37 | GO:0005759 | mitochondrial matrix                            | 324   | 1.1e-05 |
| 38 | GO:0031597 | cytosolic proteasome complex                    | 11    | 1.2e-05 |
| 39 | GO:0005758 | mitochondrial intermembrane space               | 63    | 1.2e-05 |
| 40 | GO:0000784 | nuclear chromosome, telomeric region            | 63    | 1.2e-05 |
| 41 | GO:0046540 | U4/U6 x U5 tri-snRNP complex                    | 16    | 1.3e-05 |

Table 6: **Topic 1** (Terms that appear in less than half of other topics)

|    | GO.ID      | Term                                         | Total | p-Value |
|----|------------|----------------------------------------------|-------|---------|
| 15 | GO:0005665 | DNA-directed RNA polymerase II, core complex | 15    | 5.1e-06 |

Table 7: **Topic 2** (Terms that appear in less than half of other topics)

|    | GO.ID      | Term                                                 | Total | p-Value |
|----|------------|------------------------------------------------------|-------|---------|
| 8  | GO:0005730 | nucleolus                                            | 696   | 5.7e-12 |
| 10 | GO:0005743 | mitochondrial inner membrane                         | 393   | 2.9e-11 |
| 13 | GO:0030529 | ribonucleoprotein complex                            | 542   | 6.4e-09 |
| 18 | GO:0001725 | stress fiber                                         | 37    | 1.7e-07 |
| 20 | GO:0008540 | proteasome regulatory particle, base subcomplex      | 12    | 3.1e-07 |
| 21 | GO:0030018 | Z disc                                               | 77    | 3.1e-07 |
| 23 | GO:0005746 | mitochondrial respiratory chain                      | 62    | 8.4e-07 |
| 25 | GO:0098796 | membrane protein complex                             | 634   | 1.2e-06 |
| 26 | GO:0098800 | inner mitochondrial membrane protein complex         | 91    | 1.3e-06 |
| 27 | GO:0043234 | protein complex                                      | 2881  | 1.3e-06 |
| 28 | GO:0005762 | mitochondrial large ribosomal subunit                | 32    | 1.5e-06 |
| 29 | GO:0071011 | pre-catalytic spliceosome                            | 21    | 2.4e-06 |
| 30 | GO:0000932 | cytoplasmic mRNA processing body                     | 59    | 2.9e-06 |
| 31 | GO:0005793 | endoplasmic reticulum-Golgi intermediate compartment | 66    | 3.1e-06 |
| 32 | GO:0005832 | chaperonin-containing T-complex                      | 9     | 3.8e-06 |
| 33 | GO:0031597 | cytosolic proteasome complex                         | 11    | 4.3e-06 |
| 34 | GO:0005840 | ribosome                                             | 126   | 6.9e-06 |
| 35 | GO:0005758 | mitochondrial intermembrane space                    | 63    | 8.6e-06 |
| 36 | GO:0005686 | U2 snRNP                                             | 16    | 9.1e-06 |
| 37 | GO:0005681 | spliceosomal complex                                 | 162   | 1.2e-05 |
| 38 | GO:0016282 | eukaryotic 43S preinitiation complex                 | 14    | 1.3e-05 |

Table 8: [Topic 3](#) (Terms that appear in less than half of other topics)

|    | GO.ID      | Term              | Total | p-Value |
|----|------------|-------------------|-------|---------|
| 13 | GO:0005604 | basement membrane | 58    | 1.0e-05 |

Table 9: [Topic 4](#) (Terms that appear in less than half of other topics)

|    | GO.ID      | Term                                                 | Total | p-Value |
|----|------------|------------------------------------------------------|-------|---------|
| 5  | GO:0005743 | mitochondrial inner membrane                         | 393   | 4.0e-17 |
| 9  | GO:0005730 | nucleolus                                            | 696   | 1.2e-11 |
| 10 | GO:0005840 | ribosome                                             | 126   | 7.9e-10 |
| 16 | GO:0005762 | mitochondrial large ribosomal subunit                | 32    | 7.5e-08 |
| 19 | GO:0005643 | nuclear pore                                         | 61    | 1.5e-07 |
| 21 | GO:0030529 | ribonucleoprotein complex                            | 542   | 2.8e-07 |
| 23 | GO:0008540 | proteasome regulatory particle, base subcomplex      | 12    | 7.0e-07 |
| 24 | GO:0043234 | protein complex                                      | 2881  | 9.6e-07 |
| 26 | GO:0005789 | endoplasmic reticulum membrane                       | 628   | 2.4e-06 |
| 27 | GO:0098796 | membrane protein complex                             | 634   | 5.3e-06 |
| 28 | GO:0005746 | mitochondrial respiratory chain                      | 62    | 5.3e-06 |
| 29 | GO:0005793 | endoplasmic reticulum-Golgi intermediate compartment | 66    | 7.5e-06 |
| 30 | GO:0031597 | cytosolic proteasome complex                         | 11    | 8.6e-06 |
| 31 | GO:0005832 | chaperonin-containing T-complex                      | 9     | 8.7e-06 |
| 32 | GO:0005758 | mitochondrial intermembrane space                    | 63    | 9.4e-06 |
| 33 | GO:0016282 | eukaryotic 43S preinitiation complex                 | 14    | 1.1e-05 |
| 34 | GO:0005885 | Arp2/3 protein complex                               | 10    | 1.3e-05 |

Table 10: **Topic 5** (Terms that appear in less than half of other topics)



|    | GO.ID      | Term                                   | Total | p-Value |
|----|------------|----------------------------------------|-------|---------|
| 12 | GO:0000777 | condensed chromosome kinetochore       | 89    | 1.1e-10 |
| 26 | GO:0005813 | centrosome                             | 400   | 1.4e-06 |
| 28 | GO:0000922 | spindle pole                           | 105   | 2.2e-06 |
| 30 | GO:0005876 | spindle microtubule                    | 49    | 3.4e-06 |
| 33 | GO:0005689 | U12-type spliceosomal complex          | 25    | 4.8e-06 |
| 34 | GO:0005688 | U6 snRNP                               | 8     | 5.7e-06 |
| 36 | GO:0000940 | condensed chromosome outer kinetochore | 13    | 9.5e-06 |
| 37 | GO:0005759 | mitochondrial matrix                   | 324   | 1.1e-05 |
| 40 | GO:0000784 | nuclear chromosome, telomeric region   | 63    | 1.2e-05 |
| 41 | GO:0046540 | U4/U6 x U5 tri-snRNP complex           | 16    | 1.3e-05 |

Table 11: **Topic 1** (Terms that only appear in this topic)

|    | GO.ID      | Term                                         | Total | p-Value |
|----|------------|----------------------------------------------|-------|---------|
| 15 | GO:0005665 | DNA-directed RNA polymerase II, core complex | 15    | 5.1e-06 |

Table 12: **Topic 2** (Terms that only appear in this topic)

|    | GO.ID      | Term                                         | Total | p-Value |
|----|------------|----------------------------------------------|-------|---------|
| 18 | GO:0001725 | stress fiber                                 | 37    | 1.7e-07 |
| 21 | GO:0030018 | Z disc                                       | 77    | 3.1e-07 |
| 26 | GO:0098800 | inner mitochondrial membrane protein complex | 91    | 1.3e-06 |
| 30 | GO:0000932 | cytoplasmic mRNA processing body             | 59    | 2.9e-06 |

Table 13: **Topic 3** (Terms that only appear in this topic)

|    | GO.ID      | Term              | Total | p-Value |
|----|------------|-------------------|-------|---------|
| 13 | GO:0005604 | basement membrane | 58    | 1.0e-05 |

Table 14: **Topic 4** (Terms that only appear in this topic)

|    | GO.ID      | Term                           | Total | p-Value |
|----|------------|--------------------------------|-------|---------|
| 26 | GO:0005789 | endoplasmic reticulum membrane | 628   | 2.4e-06 |
| 34 | GO:0005885 | Arp2/3 protein complex         | 10    | 1.3e-05 |

Table 15: **Topic 5** (Terms that only appear in this topic)
