# Supplementary material for: CellTree: an R/bioconductor package to infer the hierarchical structure of cell populations from single-cell RNA-seq data
Source: PubMed Central journal article supplement (PMC5020541; doi:10.1186/s12859-016-1175-6), 2016-09-13
Supplement: 12859_2016_1175_MOESM5_ESM.pdf [file 12859_2016_1175_MOESM5_ESM.pdf]

## Ordered cells by branch

Legend:  Topic #1  Topic #2  Topic #3  Topic #4

Table 1: Branch 1

| node.label | cell.name               | cell.group     | main.topic | topics                                                                                |
|------------|-------------------------|----------------|------------|---------------------------------------------------------------------------------------|
| 2          | Oocyte.2                | oocyte         | 3          |    |
| 3          | Oocyte.3                | oocyte         | 3          |    |
| 1          | Oocyte.1                | oocyte         | 3          |    |
| 4          | Zygote.1                | zygote         | 3          |    |
| 6          | Zygote.3                | zygote         | 3          |    |
| 5          | Zygote.2                | zygote         | 3          |    |
| 15         | X4.cell.embryo.1.Cell.3 | X4.cell.embryo | 3          |    |
| 7          | X2.cell.embryo.1.Cell.1 | X2.cell.embryo | 3          |    |
| 10         | X2.cell.embryo.2.Cell.2 | X2.cell.embryo | 3          |    |
| 8          | X2.cell.embryo.1.Cell.2 | X2.cell.embryo | 3          |    |
| 12         | X2.cell.embryo.3.Cell.2 | X2.cell.embryo | 3          |    |
| 11         | X2.cell.embryo.3.Cell.1 | X2.cell.embryo | 3          |    |
| 20         | X4.cell.embryo.2.Cell.4 | X4.cell.embryo | 3          |    |
| 9          | X2.cell.embryo.2.Cell.1 | X2.cell.embryo | 3          |    |
| 18         | X4.cell.embryo.2.Cell.2 | X4.cell.embryo | 3          |    |
| 16         | X4.cell.embryo.1.Cell.4 | X4.cell.embryo | 3          |    |
| 14         | X4.cell.embryo.1.Cell.2 | X4.cell.embryo | 3          |  |
| 22         | X4.cell.embryo.3.Cell.2 | X4.cell.embryo | 3          |  |
| 13         | X4.cell.embryo.1.Cell.1 | X4.cell.embryo | 3          |  |
| 24         | X4.cell.embryo.3.Cell.4 | X4.cell.embryo | 3          |  |
| 23         | X4.cell.embryo.3.Cell.3 | X4.cell.embryo | 3          |  |
| 21         | X4.cell.embryo.3.Cell.1 | X4.cell.embryo | 3          |  |
| 17         | X4.cell.embryo.2.Cell.1 | X4.cell.embryo | 3          |  |
| 19         | X4.cell.embryo.2.Cell.3 | X4.cell.embryo | 3          |  |
| 25         | X8.cell.embryo.1.Cell.1 | X8.cell.embryo | 3          |  |
| 27         | X8.cell.embryo.1.Cell.3 | X8.cell.embryo | 3          |  |
| 28         | X8.cell.embryo.1.Cell.4 | X8.cell.embryo | 3          |  |
| 26         | X8.cell.embryo.1.Cell.2 | X8.cell.embryo | 3          |  |
| 47         | Morulae.1.Cell.3        | Morulae.1      | 4          |  |
| 52         | Morulae.1.Cell.8        | Morulae.1      | 4          |  |
| 40         | X8.cell.embryo.3.Cell.4 | X8.cell.embryo | 4          |  |
| 37         | X8.cell.embryo.3.Cell.1 | X8.cell.embryo | 4          |  |
| 41         | X8.cell.embryo.3.Cell.5 | X8.cell.embryo | 4          |  |
| 38         | X8.cell.embryo.3.Cell.2 | X8.cell.embryo | 4          |  |
| 43         | X8.cell.embryo.3.Cell.7 | X8.cell.embryo | 4          |  |
| 42         | X8.cell.embryo.3.Cell.6 | X8.cell.embryo | 4          |  |
| 39         | X8.cell.embryo.3.Cell.3 | X8.cell.embryo | 4          |  |
| 30         | X8.cell.embryo.2.Cell.2 | X8.cell.embryo | 4          |  |
| 31         | X8.cell.embryo.2.Cell.3 | X8.cell.embryo | 4          |  |
| 36         | X8.cell.embryo.2.Cell.8 | X8.cell.embryo | 4          |  |
| 29         | X8.cell.embryo.2.Cell.1 | X8.cell.embryo | 4          |  |
| 34         | X8.cell.embryo.2.Cell.6 | X8.cell.embryo | 4          |  |

|    |                          |                   |   |  |
|----|--------------------------|-------------------|---|--|
| 44 | X8.cell.embryo.3.Cell.8  | X8.cell.embryo    | 4 |  |
| 35 | X8.cell.embryo.2.Cell.7  | X8.cell.embryo    | 4 |  |
| 33 | X8.cell.embryo.2.Cell.5  | X8.cell.embryo    | 4 |  |
| 32 | X8.cell.embryo.2.Cell.4  | X8.cell.embryo    | 4 |  |
| 56 | Morulae.2.Cell.4         | Morulae.2         | 4 |  |
| 58 | Morulae.2.Cell.6         | Morulae.2         | 4 |  |
| 55 | Morulae.2.Cell.3         | Morulae.2         | 4 |  |
| 50 | Morulae.1.Cell.6         | Morulae.1         | 4 |  |
| 53 | Morulae.2.Cell.1         | Morulae.2         | 4 |  |
| 57 | Morulae.2.Cell.5         | Morulae.2         | 4 |  |
| 60 | Morulae.2.Cell.8         | Morulae.2         | 4 |  |
| 46 | Morulae.1.Cell.2         | Morulae.1         | 4 |  |
| 54 | Morulae.2.Cell.2         | Morulae.2         | 4 |  |
| 51 | Morulae.1.Cell.7         | Morulae.1         | 4 |  |
| 48 | Morulae.1.Cell.4         | Morulae.1         | 4 |  |
| 59 | Morulae.2.Cell.7         | Morulae.2         | 4 |  |
| 45 | Morulae.1.Cell.1         | Morulae.1         | 4 |  |
| 49 | Morulae.1.Cell.5         | Morulae.1         | 4 |  |
| 74 | Late.blastocyst.2.Cell.2 | Late.blastocyst.2 | 2 |  |
| 75 | Late.blastocyst.2.Cell.3 | Late.blastocyst.2 | 2 |  |
| 83 | Late.blastocyst.3.Cell.1 | Late.blastocyst.3 | 2 |  |
| 86 | Late.blastocyst.3.Cell.4 | Late.blastocyst.3 | 2 |  |
| 73 | Late.blastocyst.2.Cell.1 | Late.blastocyst.2 | 2 |  |

Table 2: Branch 1.1

| node.label | cell.name                 | cell.group        | main.topic | topics |
|------------|---------------------------|-------------------|------------|--------|
| 84         | Late.blastocyst.3.Cell.2  | Late.blastocyst.3 | 2          |        |
| 80         | Late.blastocyst.2.Cell.8  | Late.blastocyst.2 | 2          |        |
| 90         | Late.blastocyst.3.Cell.8  | Late.blastocyst.3 | 2          |        |
| 69         | Late.blastocyst.1.Cell.9  | Late.blastocyst.1 | 2          |        |
| 89         | Late.blastocyst.3.Cell.7  | Late.blastocyst.3 | 2          |        |
| 72         | Late.blastocyst.1.Cell.12 | Late.blastocyst.1 | 2          |        |
| 77         | Late.blastocyst.2.Cell.5  | Late.blastocyst.2 | 2          |        |
| 78         | Late.blastocyst.2.Cell.6  | Late.blastocyst.2 | 2          |        |
| 79         | Late.blastocyst.2.Cell.7  | Late.blastocyst.2 | 2          |        |
| 81         | Late.blastocyst.2.Cell.9  | Late.blastocyst.2 | 2          |        |
| 64         | Late.blastocyst.1.Cell.4  | Late.blastocyst.1 | 2          |        |
| 82         | Late.blastocyst.2.Cell.10 | Late.blastocyst.2 | 2          |        |
| 66         | Late.blastocyst.1.Cell.6  | Late.blastocyst.1 | 2          |        |
| 85         | Late.blastocyst.3.Cell.3  | Late.blastocyst.3 | 2          |        |
| 88         | Late.blastocyst.3.Cell.6  | Late.blastocyst.3 | 2          |        |
| 65         | Late.blastocyst.1.Cell.5  | Late.blastocyst.1 | 2          |        |
| 76         | Late.blastocyst.2.Cell.4  | Late.blastocyst.2 | 2          |        |
| 68         | Late.blastocyst.1.Cell.8  | Late.blastocyst.1 | 2          |        |
| 67         | Late.blastocyst.1.Cell.7  | Late.blastocyst.1 | 2          |        |
| 70         | Late.blastocyst.1.Cell.10 | Late.blastocyst.1 | 2          |        |
| 61         | Late.blastocyst.1.Cell.1  | Late.blastocyst.1 | 2          |        |
| 62         | Late.blastocyst.1.Cell.2  | Late.blastocyst.1 | 2          |        |
| 63         | Late.blastocyst.1.Cell.3  | Late.blastocyst.1 | 2          |        |

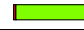

Table 3: Branch 1.2

| node.label | cell.name                | cell.group        | main.topic | topics |
|------------|--------------------------|-------------------|------------|--------|
| 87         | Late.blastocyst.3.Cell.5 | Late.blastocyst.3 | 2          |        |
| 96         | hESC.passage.0.Cell.6    | hESC.passage.0    | 1          |        |
| 92         | hESC.passage.0.Cell.2    | hESC.passage.0    | 1          |        |
| 95         | hESC.passage.0.Cell.5    | hESC.passage.0    | 1          |        |
| 98         | hESC.passage.0.Cell.8    | hESC.passage.0    | 1          |        |
| 118        | hESC.passage.10.Cell.20  | hESC.passage.10   | 1          |        |
| 94         | hESC.passage.0.Cell.4    | hESC.passage.0    | 1          |        |
| 119        | hESC.passage.10.Cell.21  | hESC.passage.10   | 1          |        |
| 97         | hESC.passage.0.Cell.7    | hESC.passage.0    | 1          |        |
| 91         | hESC.passage.0.Cell.1    | hESC.passage.0    | 1          |        |
| 113        | hESC.passage.10.Cell.15  | hESC.passage.10   | 1          |        |
| 117        | hESC.passage.10.Cell.19  | hESC.passage.10   | 1          |        |
| 115        | hESC.passage.10.Cell.17  | hESC.passage.10   | 1          |        |
| 114        | hESC.passage.10.Cell.16  | hESC.passage.10   | 1          |        |
| 106        | hESC.passage.10.Cell.8   | hESC.passage.10   | 1          |        |
| 102        | hESC.passage.10.Cell.4   | hESC.passage.10   | 1          |        |
| 112        | hESC.passage.10.Cell.14  | hESC.passage.10   | 1          |        |
| 110        | hESC.passage.10.Cell.12  | hESC.passage.10   | 1          |        |
| 116        | hESC.passage.10.Cell.18  | hESC.passage.10   | 1          |        |
| 100        | hESC.passage.10.Cell.2   | hESC.passage.10   | 1          |        |
| 104        | hESC.passage.10.Cell.6   | hESC.passage.10   | 1          |        |
| 121        | hESC.passage.10.Cell.23  | hESC.passage.10   | 1          |        |
| 93         | hESC.passage.0.Cell.3    | hESC.passage.0    | 1          |        |
| 111        | hESC.passage.10.Cell.13  | hESC.passage.10   | 1          |        |
| 101        | hESC.passage.10.Cell.3   | hESC.passage.10   | 1          |        |
| 103        | hESC.passage.10.Cell.5   | hESC.passage.10   | 1          |        |
| 99         | hESC.passage.10.Cell.1   | hESC.passage.10   | 1          |        |
| 123        | hESC.passage.10.Cell.25  | hESC.passage.10   | 1          |        |
| 108        | hESC.passage.10.Cell.10  | hESC.passage.10   | 1          |        |
| 122        | hESC.passage.10.Cell.24  | hESC.passage.10   | 1          |        |
| 105        | hESC.passage.10.Cell.7   | hESC.passage.10   | 1          |        |
| 120        | hESC.passage.10.Cell.22  | hESC.passage.10   | 1          |        |
| 109        | hESC.passage.10.Cell.11  | hESC.passage.10   | 1          |        |
| 107        | hESC.passage.10.Cell.9   | hESC.passage.10   | 1          |        |
