# Supplementary material for: CellTree: an R/bioconductor package to infer the hierarchical structure of cell populations from single-cell RNA-seq data
Source: PubMed Central journal article supplement (PMC5020541; doi:10.1186/s12859-016-1175-6), 2016-09-13
Supplement: 12859_2016_1175_MOESM6_ESM.pdf [file 12859_2016_1175_MOESM6_ESM.pdf]

|    | GO.ID      | Term                                                                                                             | Total | p-Value |
|----|------------|------------------------------------------------------------------------------------------------------------------|-------|---------|
| 1  | GO:0070124 | mitochondrial translational initiation                                                                           | 77    | 2.2e-28 |
| 2  | GO:0070125 | mitochondrial translational elongation                                                                           | 77    | 7.9e-28 |
| 3  | GO:0070126 | mitochondrial translational termination                                                                          | 79    | 9.3e-26 |
| 4  | GO:0006614 | SRP-dependent cotranslational protein targeting to membrane                                                      | 54    | 3.9e-25 |
| 5  | GO:0006415 | translational termination                                                                                        | 121   | 2.1e-23 |
| 6  | GO:0006413 | translational initiation                                                                                         | 194   | 5.7e-22 |
| 7  | GO:0000184 | nuclear-transcribed mRNA catabolic process, nonsense-mediated decay                                              | 64    | 7.8e-20 |
| 8  | GO:0006414 | translational elongation                                                                                         | 138   | 4.1e-19 |
| 9  | GO:0002479 | antigen processing and presentation of exogenous peptide antigen via MHC class I, TAP-dependent                  | 51    | 2.8e-16 |
| 10 | GO:0031145 | anaphase-promoting complex-dependent proteasomal ubiquitin-dependent protein catabolic process                   | 92    | 1.1e-15 |
| 11 | GO:0000398 | mRNA splicing, via spliceosome                                                                                   | 200   | 1.9e-15 |
| 12 | GO:0019083 | viral transcription                                                                                              | 118   | 2.2e-15 |
| 13 | GO:0051437 | positive regulation of ubiquitin-protein ligase activity involved in regulation of mitotic cell cycle transition | 57    | 1.3e-14 |
| 14 | GO:0051436 | negative regulation of ubiquitin-protein ligase activity involved in mitotic cell cycle                          | 71    | 1.8e-14 |
| 15 | GO:0006521 | regulation of cellular amino acid metabolic process                                                              | 48    | 4.1e-13 |
| 16 | GO:0006977 | DNA damage response, signal transduction by p53 class mediator resulting in cell cycle arrest                    | 49    | 2.6e-12 |
| 17 | GO:0022904 | respiratory electron transport chain                                                                             | 107   | 9.7e-12 |
| 18 | GO:0006120 | mitochondrial electron transport, NADH to ubiquinone                                                             | 40    | 1.0e-11 |
| 19 | GO:0038061 | NIK/NF-kappaB signaling                                                                                          | 71    | 2.8e-11 |
| 20 | GO:0016032 | viral process                                                                                                    | 525   | 3.2e-11 |
| 21 | GO:0006446 | regulation of translational initiation                                                                           | 62    | 8.7e-10 |
| 22 | GO:0042776 | mitochondrial ATP synthesis coupled proton transport                                                             | 17    | 1.9e-09 |
| 23 | GO:0006418 | tRNA aminoacylation for protein translation                                                                      | 43    | 2.3e-09 |
| 24 | GO:0006406 | mRNA export from nucleus                                                                                         | 62    | 2.8e-09 |
| 25 | GO:0006271 | DNA strand elongation involved in DNA replication                                                                | 35    | 7.0e-09 |
| 26 | GO:0042769 | DNA damage response, detection of DNA damage                                                                     | 28    | 3.5e-08 |
| 27 | GO:0033209 | tumor necrosis factor-mediated signaling pathway                                                                 | 87    | 4.0e-08 |
| 28 | GO:0006626 | protein targeting to mitochondrion                                                                               | 100   | 6.4e-08 |
| 29 | GO:0090263 | positive regulation of canonical Wnt signaling pathway                                                           | 86    | 3.0e-07 |
| 30 | GO:0045814 | negative regulation of gene expression, epigenetic                                                               | 127   | 4.1e-07 |
| 31 | GO:1902600 | hydrogen ion transmembrane transport                                                                             | 70    | 4.2e-07 |
| 32 | GO:0001731 | formation of translation preinitiation complex                                                                   | 14    | 6.0e-07 |
| 33 | GO:0006283 | transcription-coupled nucleotide-excision repair                                                                 | 43    | 6.0e-07 |
| 34 | GO:0051084 | 'de novo' posttranslational protein folding                                                                      | 35    | 1.3e-06 |
| 35 | GO:0010467 | gene expression                                                                                                  | 3415  | 1.5e-06 |

Table 1: **Topic 1** (All terms)

|    | GO.ID      | Term                                                                                                             | Total | p-Value |
|----|------------|------------------------------------------------------------------------------------------------------------------|-------|---------|
| 1  | GO:0070124 | mitochondrial translational initiation                                                                           | 77    | < 1e-30 |
| 2  | GO:0070125 | mitochondrial translational elongation                                                                           | 77    | < 1e-30 |
| 3  | GO:0070126 | mitochondrial translational termination                                                                          | 79    | < 1e-30 |
| 4  | GO:0006614 | SRP-dependent cotranslational protein targeting to membrane                                                      | 54    | 3.1e-29 |
| 5  | GO:0006415 | translational termination                                                                                        | 121   | 2.6e-25 |
| 6  | GO:0006413 | translational initiation                                                                                         | 194   | 2.7e-23 |
| 7  | GO:0006414 | translational elongation                                                                                         | 138   | 1.4e-20 |
| 8  | GO:0000184 | nuclear-transcribed mRNA catabolic process, nonsense-mediated decay                                              | 64    | 1.5e-20 |
| 9  | GO:0006120 | mitochondrial electron transport, NADH to ubiquinone                                                             | 40    | 3.5e-18 |
| 10 | GO:0019083 | viral transcription                                                                                              | 118   | 1.4e-17 |
| 11 | GO:0000398 | mRNA splicing, via spliceosome                                                                                   | 200   | 4.3e-15 |
| 12 | GO:0031145 | anaphase-promoting complex-dependent proteasomal ubiquitin-dependent protein catabolic process                   | 92    | 1.5e-14 |
| 13 | GO:0051437 | positive regulation of ubiquitin-protein ligase activity involved in regulation of mitotic cell cycle transition | 57    | 2.4e-14 |
| 14 | GO:0051436 | negative regulation of ubiquitin-protein ligase activity involved in mitotic cell cycle                          | 71    | 7.2e-13 |
| 15 | GO:0006521 | regulation of cellular amino acid metabolic process                                                              | 48    | 1.9e-12 |
| 16 | GO:0022904 | respiratory electron transport chain                                                                             | 107   | 3.3e-12 |
| 17 | GO:0006446 | regulation of translational initiation                                                                           | 62    | 5.9e-11 |
| 18 | GO:0006364 | rRNA processing                                                                                                  | 124   | 7.1e-11 |
| 19 | GO:0006977 | DNA damage response, signal transduction by p53 class mediator resulting in cell cycle arrest                    | 49    | 7.6e-11 |
| 20 | GO:0002479 | antigen processing and presentation of exogenous peptide antigen via MHC class I, TAP-dependent                  | 51    | 1.3e-10 |
| 21 | GO:0038061 | NIK/NF-kappaB signaling                                                                                          | 71    | 3.9e-10 |
| 22 | GO:0006626 | protein targeting to mitochondrion                                                                               | 100   | 5.1e-10 |
| 23 | GO:0016032 | viral process                                                                                                    | 525   | 2.5e-09 |
| 24 | GO:0042776 | mitochondrial ATP synthesis coupled proton transport                                                             | 17    | 7.7e-09 |
| 25 | GO:0001731 | formation of translation preinitiation complex                                                                   | 14    | 3.8e-08 |
| 26 | GO:0006406 | mRNA export from nucleus                                                                                         | 62    | 5.6e-08 |
| 27 | GO:1900034 | regulation of cellular response to heat                                                                          | 57    | 7.0e-08 |
| 28 | GO:0051301 | cell division                                                                                                    | 464   | 1.3e-07 |
| 29 | GO:0044743 | intracellular protein transmembrane import                                                                       | 29    | 2.1e-07 |
| 30 | GO:0006271 | DNA strand elongation involved in DNA replication                                                                | 35    | 2.6e-07 |
| 31 | GO:0000462 | maturation of SSU-rRNA from tricistronic rRNA transcript (SSU-rRNA, 5.8S rRNA, LSU-rRNA)                         | 21    | 3.3e-07 |
| 32 | GO:0033209 | tumor necrosis factor-mediated signaling pathway                                                                 | 87    | 4.4e-07 |
| 33 | GO:0006418 | tRNA aminoacylation for protein translation                                                                      | 43    | 4.6e-07 |
| 34 | GO:0006369 | termination of RNA polymerase II transcription                                                                   | 39    | 5.5e-07 |
| 35 | GO:0007077 | mitotic nuclear envelope disassembly                                                                             | 34    | 7.2e-07 |
| 36 | GO:1990542 | mitochondrial transmembrane transport                                                                            | 37    | 9.7e-07 |
| 37 | GO:0031124 | mRNA 3'-end processing                                                                                           | 68    | 1.3e-06 |
| 38 | GO:0006283 | transcription-coupled nucleotide-excision repair                                                                 | 43    | 1.6e-06 |
| 39 | GO:1902600 | hydrogen ion transmembrane transport                                                                             | 70    | 1.6e-06 |

Table 2: [Topic 2](#) (All terms)

|    | GO.ID      | Term                                                                                                             | Total | p-Value |
|----|------------|------------------------------------------------------------------------------------------------------------------|-------|---------|
| 1  | GO:0006415 | translational termination                                                                                        | 121   | 2.1e-18 |
| 2  | GO:0006413 | translational initiation                                                                                         | 194   | 1.7e-17 |
| 3  | GO:0006614 | SRP-dependent cotranslational protein targeting to membrane                                                      | 54    | 5.2e-17 |
| 4  | GO:0006414 | translational elongation                                                                                         | 138   | 1.8e-16 |
| 5  | GO:0019083 | viral transcription                                                                                              | 118   | 5.4e-16 |
| 6  | GO:0000184 | nuclear-transcribed mRNA catabolic process, nonsense-mediated decay                                              | 64    | 1.9e-15 |
| 7  | GO:0031145 | anaphase-promoting complex-dependent proteasomal ubiquitin-dependent protein catabolic process                   | 92    | 2.2e-09 |
| 8  | GO:0051437 | positive regulation of ubiquitin-protein ligase activity involved in regulation of mitotic cell cycle transition | 57    | 1.4e-08 |
| 9  | GO:0000281 | mitotic cytokinesis                                                                                              | 25    | 1.3e-07 |
| 10 | GO:0038061 | NIK/NF-kappaB signaling                                                                                          | 71    | 8.1e-07 |
| 11 | GO:0051436 | negative regulation of ubiquitin-protein ligase activity involved in mitotic cell cycle                          | 71    | 8.5e-07 |

Table 3: [Topic 3](#) (All terms)

|    | GO.ID      | Term                                                                                                             | Total | p-Value |
|----|------------|------------------------------------------------------------------------------------------------------------------|-------|---------|
| 1  | GO:0006413 | translational initiation                                                                                         | 194   | 7.4e-22 |
| 2  | GO:0006614 | SRP-dependent cotranslational protein targeting to membrane                                                      | 54    | 1.5e-21 |
| 3  | GO:0006415 | translational termination                                                                                        | 121   | 3.0e-21 |
| 4  | GO:0000184 | nuclear-transcribed mRNA catabolic process, nonsense-mediated decay                                              | 64    | 5.6e-21 |
| 5  | GO:0000398 | mRNA splicing, via spliceosome                                                                                   | 200   | 5.8e-19 |
| 6  | GO:0006414 | translational elongation                                                                                         | 138   | 1.1e-17 |
| 7  | GO:0019083 | viral transcription                                                                                              | 118   | 3.1e-17 |
| 8  | GO:0070125 | mitochondrial translational elongation                                                                           | 77    | 3.2e-16 |
| 9  | GO:0006364 | rRNA processing                                                                                                  | 124   | 7.0e-16 |
| 10 | GO:0070124 | mitochondrial translational initiation                                                                           | 77    | 2.1e-15 |
| 11 | GO:0070126 | mitochondrial translational termination                                                                          | 79    | 1.6e-14 |
| 12 | GO:0051437 | positive regulation of ubiquitin-protein ligase activity involved in regulation of mitotic cell cycle transition | 57    | 7.5e-12 |
| 13 | GO:0031145 | anaphase-promoting complex-dependent proteasomal ubiquitin-dependent protein catabolic process                   | 92    | 1.1e-11 |
| 14 | GO:0051436 | negative regulation of ubiquitin-protein ligase activity involved in mitotic cell cycle                          | 71    | 5.2e-10 |
| 15 | GO:0010501 | RNA secondary structure unwinding                                                                                | 33    | 1.5e-09 |
| 16 | GO:0006521 | regulation of cellular amino acid metabolic process                                                              | 48    | 4.3e-09 |
| 17 | GO:0000462 | maturation of SSU-rRNA from tricistronic rRNA transcript (SSU-rRNA, 5.8S rRNA, LSU-rRNA)                         | 21    | 4.6e-09 |
| 18 | GO:0045596 | negative regulation of cell differentiation                                                                      | 309   | 9.5e-09 |
| 19 | GO:0002479 | antigen processing and presentation of exogenous peptide antigen via MHC class I, TAP-dependent                  | 51    | 1.0e-08 |
| 20 | GO:0038061 | NIK/NF-kappaB signaling                                                                                          | 71    | 1.1e-08 |
| 21 | GO:0006406 | mRNA export from nucleus                                                                                         | 62    | 1.8e-08 |
| 22 | GO:0048387 | negative regulation of retinoic acid receptor signaling pathway                                                  | 25    | 1.9e-08 |
| 23 | GO:0006446 | regulation of translational initiation                                                                           | 62    | 2.1e-08 |
| 24 | GO:0031124 | mRNA 3'-end processing                                                                                           | 68    | 2.2e-08 |
| 25 | GO:0006369 | termination of RNA polymerase II transcription                                                                   | 39    | 3.5e-08 |
| 26 | GO:0016032 | viral process                                                                                                    | 525   | 8.1e-08 |
| 27 | GO:0001731 | formation of translation preinitiation complex                                                                   | 14    | 1.1e-07 |
| 28 | GO:0043066 | negative regulation of apoptotic process                                                                         | 516   | 1.4e-07 |
| 29 | GO:0006368 | transcription elongation from RNA polymerase II promoter                                                         | 72    | 2.0e-07 |
| 30 | GO:0006977 | DNA damage response, signal transduction by p53 class mediator resulting in cell cycle arrest                    | 49    | 2.7e-07 |
| 31 | GO:0010467 | gene expression                                                                                                  | 3415  | 3.5e-07 |

Table 4: [Topic 4](#) (All terms)

|    | GO.ID      | Term                                                                                            | Total | p-Value |
|----|------------|-------------------------------------------------------------------------------------------------|-------|---------|
| 1  | GO:0070124 | mitochondrial translational initiation                                                          | 77    | 2.2e-28 |
| 2  | GO:0070125 | mitochondrial translational elongation                                                          | 77    | 7.9e-28 |
| 3  | GO:0070126 | mitochondrial translational termination                                                         | 79    | 9.3e-26 |
| 9  | GO:0002479 | antigen processing and presentation of exogenous peptide antigen via MHC class I, TAP-dependent | 51    | 2.8e-16 |
| 11 | GO:0000398 | mRNA splicing, via spliceosome                                                                  | 200   | 1.9e-15 |
| 15 | GO:0006521 | regulation of cellular amino acid metabolic process                                             | 48    | 4.1e-13 |
| 16 | GO:0006977 | DNA damage response, signal transduction by p53 class mediator resulting in cell cycle arrest   | 49    | 2.6e-12 |
| 17 | GO:0022904 | respiratory electron transport chain                                                            | 107   | 9.7e-12 |
| 18 | GO:0006120 | mitochondrial electron transport, NADH to ubiquinone                                            | 40    | 1.0e-11 |
| 20 | GO:0016032 | viral process                                                                                   | 525   | 3.2e-11 |
| 21 | GO:0006446 | regulation of translational initiation                                                          | 62    | 8.7e-10 |
| 22 | GO:0042776 | mitochondrial ATP synthesis coupled proton transport                                            | 17    | 1.9e-09 |
| 23 | GO:0006418 | tRNA aminoacylation for protein translation                                                     | 43    | 2.3e-09 |
| 24 | GO:0006406 | mRNA export from nucleus                                                                        | 62    | 2.8e-09 |
| 25 | GO:0006271 | DNA strand elongation involved in DNA replication                                               | 35    | 7.0e-09 |
| 26 | GO:0042769 | DNA damage response, detection of DNA damage                                                    | 28    | 3.5e-08 |
| 27 | GO:0033209 | tumor necrosis factor-mediated signaling pathway                                                | 87    | 4.0e-08 |
| 28 | GO:0006626 | protein targeting to mitochondrion                                                              | 100   | 6.4e-08 |
| 29 | GO:0090263 | positive regulation of canonical Wnt signaling pathway                                          | 86    | 3.0e-07 |
| 30 | GO:0045814 | negative regulation of gene expression, epigenetic                                              | 127   | 4.1e-07 |
| 31 | GO:1902600 | hydrogen ion transmembrane transport                                                            | 70    | 4.2e-07 |
| 32 | GO:0001731 | formation of translation preinitiation complex                                                  | 14    | 6.0e-07 |
| 33 | GO:0006283 | transcription-coupled nucleotide-excision repair                                                | 43    | 6.0e-07 |
| 34 | GO:0051084 | 'de novo' posttranslational protein folding                                                     | 35    | 1.3e-06 |
| 35 | GO:0010467 | gene expression                                                                                 | 3415  | 1.5e-06 |

Table 5: **Topic 1** (Terms that appear in less than half of other topics)

|    | GO.ID      | Term                                                                                            | Total | p-Value |
|----|------------|-------------------------------------------------------------------------------------------------|-------|---------|
| 1  | GO:0070124 | mitochondrial translational initiation                                                          | 77    | < 1e-30 |
| 2  | GO:0070125 | mitochondrial translational elongation                                                          | 77    | < 1e-30 |
| 3  | GO:0070126 | mitochondrial translational termination                                                         | 79    | < 1e-30 |
| 9  | GO:0006120 | mitochondrial electron transport, NADH to ubiquinone                                            | 40    | 3.5e-18 |
| 11 | GO:0000398 | mRNA splicing, via spliceosome                                                                  | 200   | 4.3e-15 |
| 15 | GO:0006521 | regulation of cellular amino acid metabolic process                                             | 48    | 1.9e-12 |
| 16 | GO:0022904 | respiratory electron transport chain                                                            | 107   | 3.3e-12 |
| 17 | GO:0006446 | regulation of translational initiation                                                          | 62    | 5.9e-11 |
| 18 | GO:0006364 | rRNA processing                                                                                 | 124   | 7.1e-11 |
| 19 | GO:0006977 | DNA damage response, signal transduction by p53 class mediator resulting in cell cycle arrest   | 49    | 7.6e-11 |
| 20 | GO:0002479 | antigen processing and presentation of exogenous peptide antigen via MHC class I, TAP-dependent | 51    | 1.3e-10 |
| 22 | GO:0006626 | protein targeting to mitochondrion                                                              | 100   | 5.1e-10 |
| 23 | GO:0016032 | viral process                                                                                   | 525   | 2.5e-09 |
| 24 | GO:0042776 | mitochondrial ATP synthesis coupled proton transport                                            | 17    | 7.7e-09 |
| 25 | GO:0001731 | formation of translation preinitiation complex                                                  | 14    | 3.8e-08 |
| 26 | GO:0006406 | mRNA export from nucleus                                                                        | 62    | 5.6e-08 |
| 27 | GO:1900034 | regulation of cellular response to heat                                                         | 57    | 7.0e-08 |
| 28 | GO:0051301 | cell division                                                                                   | 464   | 1.3e-07 |
| 29 | GO:0044743 | intracellular protein transmembrane import                                                      | 29    | 2.1e-07 |
| 30 | GO:0006271 | DNA strand elongation involved in DNA replication                                               | 35    | 2.6e-07 |
| 31 | GO:0000462 | maturation of SSU-rRNA from tricistronic rRNA transcript (SSU-rRNA, 5.8S rRNA, LSU-rRNA)        | 21    | 3.3e-07 |
| 32 | GO:0033209 | tumor necrosis factor-mediated signaling pathway                                                | 87    | 4.4e-07 |
| 33 | GO:0006418 | tRNA aminoacylation for protein translation                                                     | 43    | 4.6e-07 |
| 34 | GO:0006369 | termination of RNA polymerase II transcription                                                  | 39    | 5.5e-07 |
| 35 | GO:0007077 | mitotic nuclear envelope disassembly                                                            | 34    | 7.2e-07 |
| 36 | GO:1990542 | mitochondrial transmembrane transport                                                           | 37    | 9.7e-07 |
| 37 | GO:0031124 | mRNA 3'-end processing                                                                          | 68    | 1.3e-06 |
| 38 | GO:0006283 | transcription-coupled nucleotide-excision repair                                                | 43    | 1.6e-06 |
| 39 | GO:1902600 | hydrogen ion transmembrane transport                                                            | 70    | 1.6e-06 |

Table 6: **Topic 2** (Terms that appear in less than half of other topics)

|   | GO.ID      | Term                | Total | p-Value |
|---|------------|---------------------|-------|---------|
| 9 | GO:0000281 | mitotic cytokinesis | 25    | 1.3e-07 |

Table 7: **Topic 3** (Terms that appear in less than half of other topics)

|    | GO.ID      | Term                                                                                            | Total | p-Value |
|----|------------|-------------------------------------------------------------------------------------------------|-------|---------|
| 5  | GO:0000398 | mRNA splicing, via spliceosome                                                                  | 200   | 5.8e-19 |
| 8  | GO:0070125 | mitochondrial translational elongation                                                          | 77    | 3.2e-16 |
| 9  | GO:0006364 | rRNA processing                                                                                 | 124   | 7.0e-16 |
| 10 | GO:0070124 | mitochondrial translational initiation                                                          | 77    | 2.1e-15 |
| 11 | GO:0070126 | mitochondrial translational termination                                                         | 79    | 1.6e-14 |
| 15 | GO:0010501 | RNA secondary structure unwinding                                                               | 33    | 1.5e-09 |
| 16 | GO:0006521 | regulation of cellular amino acid metabolic process                                             | 48    | 4.3e-09 |
| 17 | GO:0000462 | maturation of SSU-rRNA from tricistronic rRNA transcript (SSU-rRNA, 5.8S rRNA, LSU-rRNA)        | 21    | 4.6e-09 |
| 18 | GO:0045596 | negative regulation of cell differentiation                                                     | 309   | 9.5e-09 |
| 19 | GO:0002479 | antigen processing and presentation of exogenous peptide antigen via MHC class I, TAP-dependent | 51    | 1.0e-08 |
| 21 | GO:0006406 | mRNA export from nucleus                                                                        | 62    | 1.8e-08 |
| 22 | GO:0048387 | negative regulation of retinoic acid receptor signaling pathway                                 | 25    | 1.9e-08 |
| 23 | GO:0006446 | regulation of translational initiation                                                          | 62    | 2.1e-08 |
| 24 | GO:0031124 | mRNA 3'-end processing                                                                          | 68    | 2.2e-08 |
| 25 | GO:0006369 | termination of RNA polymerase II transcription                                                  | 39    | 3.5e-08 |
| 26 | GO:0016032 | viral process                                                                                   | 525   | 8.1e-08 |
| 27 | GO:0001731 | formation of translation preinitiation complex                                                  | 14    | 1.1e-07 |
| 28 | GO:0043066 | negative regulation of apoptotic process                                                        | 516   | 1.4e-07 |
| 29 | GO:0006368 | transcription elongation from RNA polymerase II promoter                                        | 72    | 2.0e-07 |
| 30 | GO:0006977 | DNA damage response, signal transduction by p53 class mediator resulting in cell cycle arrest   | 49    | 2.7e-07 |
| 31 | GO:0010467 | gene expression                                                                                 | 3415  | 3.5e-07 |

Table 8: [Topic 4](#) (Terms that appear in less than half of other topics)

|    | GO.ID      | Term                                                   | Total | p-Value |
|----|------------|--------------------------------------------------------|-------|---------|
| 26 | GO:0042769 | DNA damage response, detection of DNA damage           | 28    | 3.5e-08 |
| 29 | GO:0090263 | positive regulation of canonical Wnt signaling pathway | 86    | 3.0e-07 |
| 30 | GO:0045814 | negative regulation of gene expression, epigenetic     | 127   | 4.1e-07 |
| 34 | GO:0051084 | 'de novo' posttranslational protein folding            | 35    | 1.3e-06 |

Table 9: **Topic 1** (Terms that only appear in this topic)

|    | GO.ID      | Term                                       | Total | p-Value |
|----|------------|--------------------------------------------|-------|---------|
| 27 | GO:1900034 | regulation of cellular response to heat    | 57    | 7.0e-08 |
| 28 | GO:0051301 | cell division                              | 464   | 1.3e-07 |
| 29 | GO:0044743 | intracellular protein transmembrane import | 29    | 2.1e-07 |
| 35 | GO:0007077 | mitotic nuclear envelope disassembly       | 34    | 7.2e-07 |
| 36 | GO:1990542 | mitochondrial transmembrane transport      | 37    | 9.7e-07 |

Table 10: **Topic 2** (Terms that only appear in this topic)

|   | GO.ID      | Term                | Total | p-Value |
|---|------------|---------------------|-------|---------|
| 9 | GO:0000281 | mitotic cytokinesis | 25    | 1.3e-07 |

Table 11: **Topic 3** (Terms that only appear in this topic)

|    | GO.ID      | Term                                                            | Total | p-Value |
|----|------------|-----------------------------------------------------------------|-------|---------|
| 15 | GO:0010501 | RNA secondary structure unwinding                               | 33    | 1.5e-09 |
| 18 | GO:0045596 | negative regulation of cell differentiation                     | 309   | 9.5e-09 |
| 22 | GO:0048387 | negative regulation of retinoic acid receptor signaling pathway | 25    | 1.9e-08 |
| 28 | GO:0043066 | negative regulation of apoptotic process                        | 516   | 1.4e-07 |
| 29 | GO:0006368 | transcription elongation from RNA polymerase II promoter        | 72    | 2.0e-07 |

Table 12: **Topic 4** (Terms that only appear in this topic)
