# Supplementary material for: CellTree: an R/bioconductor package to infer the hierarchical structure of cell populations from single-cell RNA-seq data
Source: PubMed Central journal article supplement (PMC5020541; doi:10.1186/s12859-016-1175-6), 2016-09-13
Supplement: 12859_2016_1175_MOESM7_ESM.pdf [file 12859_2016_1175_MOESM7_ESM.pdf]

|    | GO.ID      | Term                                                           | Total | p-Value |
|----|------------|----------------------------------------------------------------|-------|---------|
| 1  | GO:0070062 | extracellular exosome                                          | 1659  | < 1e-30 |
| 2  | GO:0005654 | nucleoplasm                                                    | 2159  | 9.9e-27 |
| 3  | GO:0005730 | nucleolus                                                      | 643   | 5.0e-26 |
| 4  | GO:0005743 | mitochondrial inner membrane                                   | 361   | 1.2e-23 |
| 5  | GO:0005829 | cytosol                                                        | 2117  | 4.8e-20 |
| 6  | GO:0022625 | cytosolic large ribosomal subunit                              | 31    | 1.0e-18 |
| 7  | GO:0005747 | mitochondrial respiratory chain complex I                      | 40    | 1.8e-15 |
| 8  | GO:0005763 | mitochondrial small ribosomal subunit                          | 24    | 4.5e-14 |
| 9  | GO:0043209 | myelin sheath                                                  | 116   | 1.8e-13 |
| 10 | GO:0005737 | cytoplasm                                                      | 6408  | 3.5e-13 |
| 11 | GO:0043234 | protein complex                                                | 2619  | 1.1e-11 |
| 12 | GO:0016020 | membrane                                                       | 4361  | 6.7e-11 |
| 13 | GO:0071013 | catalytic step 2 spliceosome                                   | 64    | 7.0e-11 |
| 14 | GO:0005759 | mitochondrial matrix                                           | 298   | 4.3e-10 |
| 15 | GO:0005753 | mitochondrial proton-transporting ATP synthase complex         | 19    | 1.7e-09 |
| 16 | GO:0005762 | mitochondrial large ribosomal subunit                          | 28    | 1.5e-08 |
| 17 | GO:0005739 | mitochondrion                                                  | 1175  | 3.5e-08 |
| 18 | GO:0005839 | proteasome core complex                                        | 13    | 4.0e-08 |
| 19 | GO:0016607 | nuclear speck                                                  | 143   | 7.9e-08 |
| 20 | GO:0033290 | eukaryotic 48S preinitiation complex                           | 12    | 4.4e-07 |
| 21 | GO:0016282 | eukaryotic 43S preinitiation complex                           | 12    | 5.5e-07 |
| 22 | GO:0005852 | eukaryotic translation initiation factor 3 complex             | 13    | 7.1e-07 |
| 23 | GO:0030529 | ribonucleoprotein complex                                      | 501   | 8.0e-07 |
| 24 | GO:0098800 | inner mitochondrial membrane protein complex                   | 88    | 9.6e-07 |
| 25 | GO:0042470 | melanosome                                                     | 77    | 1.1e-06 |
| 26 | GO:0022627 | cytosolic small ribosomal subunit                              | 14    | 1.4e-06 |
| 27 | GO:0005925 | focal adhesion                                                 | 260   | 1.5e-06 |
| 28 | GO:0071011 | precatalytic spliceosome                                       | 16    | 2.4e-06 |
| 29 | GO:0044297 | cell body                                                      | 216   | 2.7e-06 |
| 30 | GO:0005840 | ribosome                                                       | 144   | 4.1e-06 |
| 31 | GO:0045263 | proton-transporting ATP synthase complex, coupling factor F(o) | 10    | 4.2e-06 |
| 32 | GO:0005758 | mitochondrial intermembrane space                              | 54    | 4.3e-06 |
| 33 | GO:0032040 | small-subunit processome                                       | 29    | 6.5e-06 |
| 34 | GO:0015030 | Cajal body                                                     | 41    | 7.8e-06 |
| 35 | GO:0044452 | nucleolar part                                                 | 52    | 8.1e-06 |

Table 1: **Topic 1** (All terms)

|    | GO.ID      | Term                                                   | Total | p-Value |
|----|------------|--------------------------------------------------------|-------|---------|
| 1  | GO:0070062 | extracellular exosome                                  | 1659  | < 1e-30 |
| 2  | GO:0005743 | mitochondrial inner membrane                           | 361   | < 1e-30 |
| 3  | GO:0005654 | nucleoplasm                                            | 2159  | 3.7e-25 |
| 4  | GO:0005730 | nucleolus                                              | 643   | 7.2e-25 |
| 5  | GO:0005829 | cytosol                                                | 2117  | 2.4e-22 |
| 6  | GO:0005747 | mitochondrial respiratory chain complex I              | 40    | 1.3e-19 |
| 7  | GO:0022625 | cytosolic large ribosomal subunit                      | 31    | 5.8e-19 |
| 8  | GO:0043209 | myelin sheath                                          | 116   | 1.0e-16 |
| 9  | GO:0043234 | protein complex                                        | 2619  | 3.0e-15 |
| 10 | GO:0005737 | cytoplasm                                              | 6408  | 4.2e-15 |
| 11 | GO:0005763 | mitochondrial small ribosomal subunit                  | 24    | 4.5e-15 |
| 12 | GO:0016020 | membrane                                               | 4361  | 6.7e-13 |
| 13 | GO:0071013 | catalytic step 2 spliceosome                           | 64    | 1.9e-11 |
| 14 | GO:0005762 | mitochondrial large ribosomal subunit                  | 28    | 1.1e-10 |
| 15 | GO:0005739 | mitochondrion                                          | 1175  | 8.7e-10 |
| 16 | GO:0016607 | nuclear speck                                          | 143   | 9.7e-10 |
| 17 | GO:0033290 | eukaryotic 48S preinitiation complex                   | 12    | 3.4e-09 |
| 18 | GO:0005753 | mitochondrial proton-transporting ATP synthase complex | 19    | 5.2e-09 |
| 19 | GO:0005759 | mitochondrial matrix                                   | 298   | 5.9e-09 |
| 20 | GO:0005852 | eukaryotic translation initiation factor 3 complex     | 13    | 1.0e-08 |
| 21 | GO:0005840 | ribosome                                               | 144   | 1.1e-08 |
| 22 | GO:0022627 | cytosolic small ribosomal subunit                      | 14    | 1.7e-08 |
| 23 | GO:0005839 | proteasome core complex                                | 13    | 1.9e-08 |
| 24 | GO:0044452 | nucleolar part                                         | 52    | 2.1e-08 |
| 25 | GO:0032040 | small-subunit processome                               | 29    | 2.6e-08 |
| 26 | GO:0005925 | focal adhesion                                         | 260   | 3.1e-08 |
| 27 | GO:0005758 | mitochondrial intermembrane space                      | 54    | 4.3e-08 |
| 28 | GO:0005789 | endoplasmic reticulum membrane                         | 550   | 7.6e-08 |
| 29 | GO:0016282 | eukaryotic 43S preinitiation complex                   | 12    | 7.9e-08 |
| 30 | GO:0042470 | melanosome                                             | 77    | 1.6e-07 |
| 31 | GO:0030686 | 90S preribosome                                        | 21    | 2.8e-07 |
| 32 | GO:0098796 | membrane protein complex                               | 562   | 3.6e-07 |
| 33 | GO:0005746 | mitochondrial respiratory chain                        | 64    | 5.6e-07 |
| 34 | GO:0098800 | inner mitochondrial membrane protein complex           | 88    | 5.6e-07 |
| 35 | GO:0015030 | Cajal body                                             | 41    | 1.6e-06 |
| 36 | GO:0005643 | nuclear pore                                           | 49    | 2.0e-06 |
| 37 | GO:0030529 | ribonucleoprotein complex                              | 501   | 3.1e-06 |
| 38 | GO:0000785 | chromatin                                              | 328   | 5.5e-06 |
| 39 | GO:0042645 | mitochondrial nucleoid                                 | 35    | 1.2e-05 |
| 40 | GO:0071011 | precatalytic spliceosome                               | 16    | 1.4e-05 |

Table 2: [Topic 2](#) (All terms)

|   | GO.ID      | Term                              | Total | p-Value |
|---|------------|-----------------------------------|-------|---------|
| 1 | GO:0005654 | nucleoplasm                       | 2159  | 1.0e-16 |
| 2 | GO:0022625 | cytosolic large ribosomal subunit | 31    | 4.6e-11 |
| 3 | GO:0005737 | cytoplasm                         | 6408  | 7.5e-11 |
| 4 | GO:0022627 | cytosolic small ribosomal subunit | 14    | 1.4e-07 |
| 5 | GO:0043209 | myelin sheath                     | 116   | 2.4e-07 |
| 6 | GO:0005829 | cytosol                           | 2117  | 3.1e-07 |
| 7 | GO:0005813 | centrosome                        | 349   | 2.8e-06 |
| 8 | GO:0071013 | catalytic step 2 spliceosome      | 64    | 3.7e-06 |
| 9 | GO:0005730 | nucleolus                         | 643   | 4.8e-06 |

Table 3: [Topic 3](#) (All terms)

|    | GO.ID      | Term                                               | Total | p-Value |
|----|------------|----------------------------------------------------|-------|---------|
| 1  | GO:0005654 | nucleoplasm                                        | 2159  | < 1e-30 |
| 2  | GO:0005730 | nucleolus                                          | 643   | 2.9e-30 |
| 3  | GO:0022625 | cytosolic large ribosomal subunit                  | 31    | 7.8e-19 |
| 4  | GO:0071013 | catalytic step 2 spliceosome                       | 64    | 9.1e-18 |
| 5  | GO:0005634 | nucleus                                            | 4479  | 3.9e-15 |
| 6  | GO:0016607 | nuclear speck                                      | 143   | 4.3e-14 |
| 7  | GO:0044452 | nucleolar part                                     | 52    | 8.0e-12 |
| 8  | GO:0015030 | Cajal body                                         | 41    | 4.5e-11 |
| 9  | GO:0032040 | small-subunit processome                           | 29    | 1.2e-09 |
| 10 | GO:0005852 | eukaryotic translation initiation factor 3 complex | 13    | 1.5e-09 |
| 11 | GO:0033290 | eukaryotic 48S preinitiation complex               | 12    | 1.2e-08 |
| 12 | GO:0005743 | mitochondrial inner membrane                       | 361   | 1.6e-08 |
| 13 | GO:0030686 | 90S preribosome                                    | 21    | 1.9e-08 |
| 14 | GO:0005643 | nuclear pore                                       | 49    | 3.0e-08 |
| 15 | GO:0022627 | cytosolic small ribosomal subunit                  | 14    | 3.4e-08 |
| 16 | GO:0030529 | ribonucleoprotein complex                          | 501   | 1.2e-07 |
| 17 | GO:0016282 | eukaryotic 43S preinitiation complex               | 12    | 2.1e-07 |
| 18 | GO:0043234 | protein complex                                    | 2619  | 2.6e-07 |
| 19 | GO:0005763 | mitochondrial small ribosomal subunit              | 24    | 7.2e-07 |
| 20 | GO:0071011 | precatalytic spliceosome                           | 16    | 2.0e-06 |
| 21 | GO:0043209 | myelin sheath                                      | 116   | 5.4e-06 |
| 22 | GO:0005747 | mitochondrial respiratory chain complex I          | 40    | 6.0e-06 |
| 23 | GO:0005689 | U12-type spliceosomal complex                      | 17    | 9.1e-06 |
| 24 | GO:0005732 | small nucleolar ribonucleoprotein complex          | 16    | 1.1e-05 |

Table 4: [Topic 4](#) (All terms)

|    | GO.ID      | Term                                                           | Total | p-Value |
|----|------------|----------------------------------------------------------------|-------|---------|
| 1  | GO:0070062 | extracellular exosome                                          | 1659  | < 1e-30 |
| 4  | GO:0005743 | mitochondrial inner membrane                                   | 361   | 1.2e-23 |
| 5  | GO:0005829 | cytosol                                                        | 2117  | 4.8e-20 |
| 7  | GO:0005747 | mitochondrial respiratory chain complex I                      | 40    | 1.8e-15 |
| 8  | GO:0005763 | mitochondrial small ribosomal subunit                          | 24    | 4.5e-14 |
| 10 | GO:0005737 | cytoplasm                                                      | 6408  | 3.5e-13 |
| 11 | GO:0043234 | protein complex                                                | 2619  | 1.1e-11 |
| 12 | GO:0016020 | membrane                                                       | 4361  | 6.7e-11 |
| 14 | GO:0005759 | mitochondrial matrix                                           | 298   | 4.3e-10 |
| 15 | GO:0005753 | mitochondrial proton-transporting ATP synthase complex         | 19    | 1.7e-09 |
| 16 | GO:0005762 | mitochondrial large ribosomal subunit                          | 28    | 1.5e-08 |
| 17 | GO:0005739 | mitochondrion                                                  | 1175  | 3.5e-08 |
| 18 | GO:0005839 | proteasome core complex                                        | 13    | 4.0e-08 |
| 19 | GO:0016607 | nuclear speck                                                  | 143   | 7.9e-08 |
| 20 | GO:0033290 | eukaryotic 48S preinitiation complex                           | 12    | 4.4e-07 |
| 21 | GO:0016282 | eukaryotic 43S preinitiation complex                           | 12    | 5.5e-07 |
| 22 | GO:0005852 | eukaryotic translation initiation factor 3 complex             | 13    | 7.1e-07 |
| 23 | GO:0030529 | ribonucleoprotein complex                                      | 501   | 8.0e-07 |
| 24 | GO:0098800 | inner mitochondrial membrane protein complex                   | 88    | 9.6e-07 |
| 25 | GO:0042470 | melanosome                                                     | 77    | 1.1e-06 |
| 27 | GO:0005925 | focal adhesion                                                 | 260   | 1.5e-06 |
| 28 | GO:0071011 | precatalytic spliceosome                                       | 16    | 2.4e-06 |
| 29 | GO:0044297 | cell body                                                      | 216   | 2.7e-06 |
| 30 | GO:0005840 | ribosome                                                       | 144   | 4.1e-06 |
| 31 | GO:0045263 | proton-transporting ATP synthase complex, coupling factor F(o) | 10    | 4.2e-06 |
| 32 | GO:0005758 | mitochondrial intermembrane space                              | 54    | 4.3e-06 |
| 33 | GO:0032040 | small-subunit processome                                       | 29    | 6.5e-06 |
| 34 | GO:0015030 | Cajal body                                                     | 41    | 7.8e-06 |
| 35 | GO:0044452 | nucleolar part                                                 | 52    | 8.1e-06 |

Table 5: **Topic 1** (Terms that appear in less than half of other topics)

|    | GO.ID      | Term                                                   | Total | p-Value |
|----|------------|--------------------------------------------------------|-------|---------|
| 1  | GO:0070062 | extracellular exosome                                  | 1659  | < 1e-30 |
| 2  | GO:0005743 | mitochondrial inner membrane                           | 361   | < 1e-30 |
| 5  | GO:0005829 | cytosol                                                | 2117  | 2.4e-22 |
| 6  | GO:0005747 | mitochondrial respiratory chain complex I              | 40    | 1.3e-19 |
| 9  | GO:0043234 | protein complex                                        | 2619  | 3.0e-15 |
| 10 | GO:0005737 | cytoplasm                                              | 6408  | 4.2e-15 |
| 11 | GO:0005763 | mitochondrial small ribosomal subunit                  | 24    | 4.5e-15 |
| 12 | GO:0016020 | membrane                                               | 4361  | 6.7e-13 |
| 14 | GO:0005762 | mitochondrial large ribosomal subunit                  | 28    | 1.1e-10 |
| 15 | GO:0005739 | mitochondrion                                          | 1175  | 8.7e-10 |
| 16 | GO:0016607 | nuclear speck                                          | 143   | 9.7e-10 |
| 17 | GO:0033290 | eukaryotic 48S preinitiation complex                   | 12    | 3.4e-09 |
| 18 | GO:0005753 | mitochondrial proton-transporting ATP synthase complex | 19    | 5.2e-09 |
| 19 | GO:0005759 | mitochondrial matrix                                   | 298   | 5.9e-09 |
| 20 | GO:0005852 | eukaryotic translation initiation factor 3 complex     | 13    | 1.0e-08 |
| 21 | GO:0005840 | ribosome                                               | 144   | 1.1e-08 |
| 23 | GO:0005839 | proteasome core complex                                | 13    | 1.9e-08 |
| 24 | GO:0044452 | nucleolar part                                         | 52    | 2.1e-08 |
| 25 | GO:0032040 | small-subunit processome                               | 29    | 2.6e-08 |
| 26 | GO:0005925 | focal adhesion                                         | 260   | 3.1e-08 |
| 27 | GO:0005758 | mitochondrial intermembrane space                      | 54    | 4.3e-08 |
| 28 | GO:0005789 | endoplasmic reticulum membrane                         | 550   | 7.6e-08 |
| 29 | GO:0016282 | eukaryotic 43S preinitiation complex                   | 12    | 7.9e-08 |
| 30 | GO:0042470 | melanosome                                             | 77    | 1.6e-07 |
| 31 | GO:0030686 | 90S preribosome                                        | 21    | 2.8e-07 |
| 32 | GO:0098796 | membrane protein complex                               | 562   | 3.6e-07 |
| 33 | GO:0005746 | mitochondrial respiratory chain                        | 64    | 5.6e-07 |
| 34 | GO:0098800 | inner mitochondrial membrane protein complex           | 88    | 5.6e-07 |
| 35 | GO:0015030 | Cajal body                                             | 41    | 1.6e-06 |
| 36 | GO:0005643 | nuclear pore                                           | 49    | 2.0e-06 |
| 37 | GO:0030529 | ribonucleoprotein complex                              | 501   | 3.1e-06 |
| 38 | GO:0000785 | chromatin                                              | 328   | 5.5e-06 |
| 39 | GO:0042645 | mitochondrial nucleoid                                 | 35    | 1.2e-05 |
| 40 | GO:0071011 | pre-catalytic spliceosome                              | 16    | 1.4e-05 |

Table 6: [Topic 2](#) (Terms that appear in less than half of other topics)

|   | GO.ID      | Term       | Total | p-Value |
|---|------------|------------|-------|---------|
| 3 | GO:0005737 | cytoplasm  | 6408  | 7.5e-11 |
| 6 | GO:0005829 | cytosol    | 2117  | 3.1e-07 |
| 7 | GO:0005813 | centrosome | 349   | 2.8e-06 |

Table 7: [Topic 3](#) (Terms that appear in less than half of other topics)

|    | GO.ID      | Term                                               | Total | p-Value |
|----|------------|----------------------------------------------------|-------|---------|
| 5  | GO:0005634 | nucleus                                            | 4479  | 3.9e-15 |
| 6  | GO:0016607 | nuclear speck                                      | 143   | 4.3e-14 |
| 7  | GO:0044452 | nucleolar part                                     | 52    | 8.0e-12 |
| 8  | GO:0015030 | Cajal body                                         | 41    | 4.5e-11 |
| 9  | GO:0032040 | small-subunit processome                           | 29    | 1.2e-09 |
| 10 | GO:0005852 | eukaryotic translation initiation factor 3 complex | 13    | 1.5e-09 |
| 11 | GO:0033290 | eukaryotic 48S preinitiation complex               | 12    | 1.2e-08 |
| 12 | GO:0005743 | mitochondrial inner membrane                       | 361   | 1.6e-08 |
| 13 | GO:0030686 | 90S preribosome                                    | 21    | 1.9e-08 |
| 14 | GO:0005643 | nuclear pore                                       | 49    | 3.0e-08 |
| 16 | GO:0030529 | ribonucleoprotein complex                          | 501   | 1.2e-07 |
| 17 | GO:0016282 | eukaryotic 43S preinitiation complex               | 12    | 2.1e-07 |
| 18 | GO:0043234 | protein complex                                    | 2619  | 2.6e-07 |
| 19 | GO:0005763 | mitochondrial small ribosomal subunit              | 24    | 7.2e-07 |
| 20 | GO:0071011 | precatalytic spliceosome                           | 16    | 2.0e-06 |
| 22 | GO:0005747 | mitochondrial respiratory chain complex I          | 40    | 6.0e-06 |
| 23 | GO:0005689 | U12-type spliceosomal complex                      | 17    | 9.1e-06 |
| 24 | GO:0005732 | small nucleolar ribonucleoprotein complex          | 16    | 1.1e-05 |

Table 8: [Topic 4](#) (Terms that appear in less than half of other topics)

|    | GO.ID      | Term                                                           | Total | p-Value |
|----|------------|----------------------------------------------------------------|-------|---------|
| 29 | GO:0044297 | cell body                                                      | 216   | 2.7e-06 |
| 31 | GO:0045263 | proton-transporting ATP synthase complex, coupling factor F(o) | 10    | 4.2e-06 |

Table 9: **Topic 1** (Terms that only appear in this topic)

|    | GO.ID      | Term                            | Total | p-Value |
|----|------------|---------------------------------|-------|---------|
| 28 | GO:0005789 | endoplasmic reticulum membrane  | 550   | 7.6e-08 |
| 32 | GO:0098796 | membrane protein complex        | 562   | 3.6e-07 |
| 33 | GO:0005746 | mitochondrial respiratory chain | 64    | 5.6e-07 |
| 38 | GO:0000785 | chromatin                       | 328   | 5.5e-06 |
| 39 | GO:0042645 | mitochondrial nucleoid          | 35    | 1.2e-05 |

Table 10: **Topic 2** (Terms that only appear in this topic)

|   | GO.ID      | Term       | Total | p-Value |
|---|------------|------------|-------|---------|
| 7 | GO:0005813 | centrosome | 349   | 2.8e-06 |

Table 11: **Topic 3** (Terms that only appear in this topic)

|    | GO.ID      | Term                                      | Total | p-Value |
|----|------------|-------------------------------------------|-------|---------|
| 5  | GO:0005634 | nucleus                                   | 4479  | 3.9e-15 |
| 23 | GO:0005689 | U12-type spliceosomal complex             | 17    | 9.1e-06 |
| 24 | GO:0005732 | small nucleolar ribonucleoprotein complex | 16    | 1.1e-05 |

Table 12: **Topic 4** (Terms that only appear in this topic)
