# Supplementary material for: CellTree: an R/bioconductor package to infer the hierarchical structure of cell populations from single-cell RNA-seq data
Source: PubMed Central journal article supplement (PMC5020541; doi:10.1186/s12859-016-1175-6), 2016-09-13
Supplement: 12859_2016_1175_MOESM8_ESM.pdf [file 12859_2016_1175_MOESM8_ESM.pdf]

|    | GO.ID      | Term                                     | Total | p-Value |
|----|------------|------------------------------------------|-------|---------|
| 1  | GO:0044822 | poly(A) RNA binding                      | 871   | < 1e-30 |
| 2  | GO:0003735 | structural constituent of ribosome       | 97    | < 1e-30 |
| 3  | GO:0005515 | protein binding                          | 6327  | 1.0e-21 |
| 4  | GO:0008137 | NADH dehydrogenase (ubiquinone) activity | 37    | 1.8e-14 |
| 5  | GO:0003743 | translation initiation factor activity   | 42    | 3.1e-13 |
| 6  | GO:0000166 | nucleotide binding                       | 1512  | 6.2e-12 |
| 7  | GO:0051082 | unfolded protein binding                 | 69    | 7.2e-10 |
| 8  | GO:0003729 | mRNA binding                             | 96    | 2.6e-08 |
| 9  | GO:0004812 | aminoacyl-tRNA ligase activity           | 38    | 5.2e-08 |
| 10 | GO:0003723 | RNA binding                              | 1150  | 1.2e-07 |
| 11 | GO:0004298 | threonine-type endopeptidase activity    | 14    | 1.5e-07 |
| 12 | GO:0019843 | rRNA binding                             | 33    | 1.6e-07 |
| 13 | GO:0051087 | chaperone binding                        | 60    | 3.6e-07 |
| 14 | GO:0031625 | ubiquitin protein ligase binding         | 189   | 6.6e-07 |
| 15 | GO:0004129 | cytochrome-c oxidase activity            | 19    | 7.5e-06 |

Table 1: **Topic 1** (All terms)

|    | GO.ID      | Term                                     | Total | p-Value |
|----|------------|------------------------------------------|-------|---------|
| 1  | GO:0044822 | poly(A) RNA binding                      | 871   | < 1e-30 |
| 2  | GO:0003735 | structural constituent of ribosome       | 97    | < 1e-30 |
| 3  | GO:0008137 | NADH dehydrogenase (ubiquinone) activity | 37    | 7.3e-19 |
| 4  | GO:0003743 | translation initiation factor activity   | 42    | 2.5e-16 |
| 5  | GO:0005515 | protein binding                          | 6327  | 1.6e-15 |
| 6  | GO:0000166 | nucleotide binding                       | 1512  | 1.0e-10 |
| 7  | GO:0003729 | mRNA binding                             | 96    | 3.6e-09 |
| 8  | GO:0051082 | unfolded protein binding                 | 69    | 2.9e-08 |
| 9  | GO:0004298 | threonine-type endopeptidase activity    | 14    | 7.3e-08 |
| 10 | GO:0051087 | chaperone binding                        | 60    | 4.5e-07 |
| 11 | GO:0019843 | rRNA binding                             | 33    | 6.6e-07 |
| 12 | GO:0003723 | RNA binding                              | 1150  | 9.9e-07 |
| 13 | GO:0005524 | ATP binding                              | 961   | 2.0e-06 |
| 14 | GO:0008536 | Ran GTPase binding                       | 25    | 3.2e-06 |
| 15 | GO:0004812 | aminoacyl-tRNA ligase activity           | 38    | 6.4e-06 |

Table 2: **Topic 2** (All terms)

|   | GO.ID      | Term                               | Total | p-Value |
|---|------------|------------------------------------|-------|---------|
| 1 | GO:0044822 | poly(A) RNA binding                | 871   | 6.2e-16 |
| 2 | GO:0005515 | protein binding                    | 6327  | 4.6e-10 |
| 3 | GO:0003735 | structural constituent of ribosome | 97    | 1.3e-07 |
| 4 | GO:0005524 | ATP binding                        | 961   | 1.4e-06 |
| 5 | GO:0031625 | ubiquitin protein ligase binding   | 189   | 7.9e-06 |

Table 3: **Topic 3** (All terms)

|    | GO.ID      | Term                                   | Total | p-Value |
|----|------------|----------------------------------------|-------|---------|
| 1  | GO:0044822 | poly(A) RNA binding                    | 871   | < 1e-30 |
| 2  | GO:0003735 | structural constituent of ribosome     | 97    | 5.3e-28 |
| 3  | GO:0005515 | protein binding                        | 6327  | 1.5e-13 |
| 4  | GO:0000166 | nucleotide binding                     | 1512  | 8.5e-11 |
| 5  | GO:0003743 | translation initiation factor activity | 42    | 3.1e-10 |
| 6  | GO:0003723 | RNA binding                            | 1150  | 6.5e-10 |
| 7  | GO:0019843 | rRNA binding                           | 33    | 1.2e-09 |
| 8  | GO:0003729 | mRNA binding                           | 96    | 2.0e-09 |
| 9  | GO:0003677 | DNA binding                            | 1518  | 4.4e-09 |
| 10 | GO:0030515 | snoRNA binding                         | 21    | 1.5e-07 |
| 11 | GO:0004004 | ATP-dependent RNA helicase activity    | 53    | 3.0e-07 |
| 12 | GO:0042974 | retinoic acid receptor binding         | 37    | 1.1e-06 |
| 13 | GO:0004402 | histone acetyltransferase activity     | 40    | 6.6e-06 |
| 14 | GO:0043022 | ribosome binding                       | 32    | 6.9e-06 |
| 15 | GO:0051082 | unfolded protein binding               | 69    | 8.7e-06 |

Table 4: [Topic 4](#) (All terms)

|    | GO.ID      | Term                                     | Total | p-Value |
|----|------------|------------------------------------------|-------|---------|
| 4  | GO:0008137 | NADH dehydrogenase (ubiquinone) activity | 37    | 1.8e-14 |
| 5  | GO:0003743 | translation initiation factor activity   | 42    | 3.1e-13 |
| 6  | GO:0000166 | nucleotide binding                       | 1512  | 6.2e-12 |
| 7  | GO:0051082 | unfolded protein binding                 | 69    | 7.2e-10 |
| 8  | GO:0003729 | mRNA binding                             | 96    | 2.6e-08 |
| 9  | GO:0004812 | aminoacyl-tRNA ligase activity           | 38    | 5.2e-08 |
| 10 | GO:0003723 | RNA binding                              | 1150  | 1.2e-07 |
| 11 | GO:0004298 | threonine-type endopeptidase activity    | 14    | 1.5e-07 |
| 12 | GO:0019843 | rRNA binding                             | 33    | 1.6e-07 |
| 13 | GO:0051087 | chaperone binding                        | 60    | 3.6e-07 |
| 14 | GO:0031625 | ubiquitin protein ligase binding         | 189   | 6.6e-07 |
| 15 | GO:0004129 | cytochrome-c oxidase activity            | 19    | 7.5e-06 |

Table 5: **Topic 1** (Terms that appear in less than half of other topics)

|    | GO.ID      | Term                                     | Total | p-Value |
|----|------------|------------------------------------------|-------|---------|
| 3  | GO:0008137 | NADH dehydrogenase (ubiquinone) activity | 37    | 7.3e-19 |
| 4  | GO:0003743 | translation initiation factor activity   | 42    | 2.5e-16 |
| 6  | GO:0000166 | nucleotide binding                       | 1512  | 1.0e-10 |
| 7  | GO:0003729 | mRNA binding                             | 96    | 3.6e-09 |
| 8  | GO:0051082 | unfolded protein binding                 | 69    | 2.9e-08 |
| 9  | GO:0004298 | threonine-type endopeptidase activity    | 14    | 7.3e-08 |
| 10 | GO:0051087 | chaperone binding                        | 60    | 4.5e-07 |
| 11 | GO:0019843 | rRNA binding                             | 33    | 6.6e-07 |
| 12 | GO:0003723 | RNA binding                              | 1150  | 9.9e-07 |
| 13 | GO:0005524 | ATP binding                              | 961   | 2.0e-06 |
| 14 | GO:0008536 | Ran GTPase binding                       | 25    | 3.2e-06 |
| 15 | GO:0004812 | aminoacyl-tRNA ligase activity           | 38    | 6.4e-06 |

Table 6: **Topic 2** (Terms that appear in less than half of other topics)

|   | GO.ID      | Term                             | Total | p-Value |
|---|------------|----------------------------------|-------|---------|
| 4 | GO:0005524 | ATP binding                      | 961   | 1.4e-06 |
| 5 | GO:0031625 | ubiquitin protein ligase binding | 189   | 7.9e-06 |

Table 7: **Topic 3** (Terms that appear in less than half of other topics)

|    | GO.ID      | Term                                   | Total | p-Value |
|----|------------|----------------------------------------|-------|---------|
| 4  | GO:0000166 | nucleotide binding                     | 1512  | 8.5e-11 |
| 5  | GO:0003743 | translation initiation factor activity | 42    | 3.1e-10 |
| 6  | GO:0003723 | RNA binding                            | 1150  | 6.5e-10 |
| 7  | GO:0019843 | rRNA binding                           | 33    | 1.2e-09 |
| 8  | GO:0003729 | mRNA binding                           | 96    | 2.0e-09 |
| 9  | GO:0003677 | DNA binding                            | 1518  | 4.4e-09 |
| 10 | GO:0030515 | snoRNA binding                         | 21    | 1.5e-07 |
| 11 | GO:0004004 | ATP-dependent RNA helicase activity    | 53    | 3.0e-07 |
| 12 | GO:0042974 | retinoic acid receptor binding         | 37    | 1.1e-06 |
| 13 | GO:0004402 | histone acetyltransferase activity     | 40    | 6.6e-06 |
| 14 | GO:0043022 | ribosome binding                       | 32    | 6.9e-06 |
| 15 | GO:0051082 | unfolded protein binding               | 69    | 8.7e-06 |

Table 8: [Topic 4](#) (Terms that appear in less than half of other topics)

|    | GO.ID      | Term                          | Total | p-Value |
|----|------------|-------------------------------|-------|---------|
| 15 | GO:0004129 | cytochrome-c oxidase activity | 19    | 7.5e-06 |

Table 9: **Topic 1** (Terms that only appear in this topic)

|    | GO.ID      | Term               | Total | p-Value |
|----|------------|--------------------|-------|---------|
| 14 | GO:0008536 | Ran GTPase binding | 25    | 3.2e-06 |

Table 10: **Topic 2** (Terms that only appear in this topic)

|  | GO.ID | Term | Total | p-Value |
|--|-------|------|-------|---------|
|--|-------|------|-------|---------|

Table 11: **Topic 3** (Terms that only appear in this topic)

|    | GO.ID      | Term                                | Total | p-Value |
|----|------------|-------------------------------------|-------|---------|
| 9  | GO:0003677 | DNA binding                         | 1518  | 4.4e-09 |
| 10 | GO:0030515 | snoRNA binding                      | 21    | 1.5e-07 |
| 11 | GO:0004004 | ATP-dependent RNA helicase activity | 53    | 3.0e-07 |
| 12 | GO:0042974 | retinoic acid receptor binding      | 37    | 1.1e-06 |
| 13 | GO:0004402 | histone acetyltransferase activity  | 40    | 6.6e-06 |
| 14 | GO:0043022 | ribosome binding                    | 32    | 6.9e-06 |

Table 12: **Topic 4** (Terms that only appear in this topic)
