# Supplementary material for: CellTree: an R/bioconductor package to infer the hierarchical structure of cell populations from single-cell RNA-seq data
Source: PubMed Central journal article supplement (PMC5020541; doi:10.1186/s12859-016-1175-6), 2016-09-13
Supplement: 12859_2016_1175_MOESM10_ESM.pdf [file 12859_2016_1175_MOESM10_ESM.pdf]

## Ordered cells by branch

Legend:  Topic #1  Topic #2  Topic #3  Topic #4

Table 1: Branch 1

| node.label | cell.name                                 | cell.group | main.topic | topics                                                                                |
|------------|-------------------------------------------|------------|------------|---------------------------------------------------------------------------------------|
| 278        | GSM1112767_zy2_expression.txt             | zy         | 3          |    |
| 279        | GSM1112768_zy3_expression.txt             | zy         | 3          |    |
| 280        | GSM1112769_zy4_expression.txt             | zy         | 3          |    |
| 277        | GSM1112766_zy1_expression.txt             | zy         | 3          |    |
| 111        | GSM1112600_C57twocell_20-2_expression.txt | C57twocell | 3          |    |
| 109        | GSM1112598_C57twocell_18-2_expression.txt | C57twocell | 3          |    |
| 108        | GSM1112597_C57twocell_18-1_expression.txt | C57twocell | 3          |    |
| 110        | GSM1112599_C57twocell_20-1_expression.txt | C57twocell | 3          |    |
| 107        | GSM1112596_C57twocell_16-2_expression.txt | C57twocell | 3          |    |
| 106        | GSM1112595_C57twocell_16-1_expression.txt | C57twocell | 3          |    |
| 113        | GSM1112602_C57twocell_22-2_expression.txt | C57twocell | 3          |    |
| 112        | GSM1112601_C57twocell_22-1_expression.txt | C57twocell | 3          |    |
| 120        | GSM1112609_early2cell_3-1_expression.txt  | early2cell | 3          |    |
| 119        | GSM1112608_early2cell_2-2_expression.txt  | early2cell | 3          |    |
| 116        | GSM1112605_early2cell_1-1_expression.txt  | early2cell | 3          |    |
| 121        | GSM1112610_early2cell_3-2_expression.txt  | early2cell | 3          |    |
| 18         | GSM1112507_16cell_4-2_expression.txt      | 16cell     | 3          |  |
| 115        | GSM1112604_early2cell_0r-2_expression.txt | early2cell | 3          |  |
| 117        | GSM1112606_early2cell_1-2_expression.txt  | early2cell | 3          |  |
| 118        | GSM1112607_early2cell_2-1_expression.txt  | early2cell | 3          |  |
| 114        | GSM1112603_early2cell_0r-1_expression.txt | early2cell | 3          |  |
| 208        | GSM1112697_mid2cell_3-2_expression.txt    | mid2cell   | 3          |  |
| 207        | GSM1112696_mid2cell_3-1_expression.txt    | mid2cell   | 3          |  |
| 213        | GSM1112702_mid2cell_6-1_expression.txt    | mid2cell   | 3          |  |
| 215        | GSM1112704_mid2cell_7-1_expression.txt    | mid2cell   | 3          |  |
| 205        | GSM1112694_mid2cell_0r-1_expression.txt   | mid2cell   | 3          |  |
| 214        | GSM1112703_mid2cell_6-2_expression.txt    | mid2cell   | 3          |  |
| 206        | GSM1112695_mid2cell_0r-2_expression.txt   | mid2cell   | 3          |  |
| 211        | GSM1112700_mid2cell_5-1_expression.txt    | mid2cell   | 3          |  |
| 216        | GSM1112705_mid2cell_7-2_expression.txt    | mid2cell   | 3          |  |
| 212        | GSM1112701_mid2cell_5-2_expression.txt    | mid2cell   | 3          |  |
| 172        | GSM1112661_late2cell_8-2_expression.txt   | late2cell  | 3          |  |
| 210        | GSM1112699_mid2cell_4-2_expression.txt    | mid2cell   | 3          |  |
| 209        | GSM1112698_mid2cell_4-1_expression.txt    | mid2cell   | 3          |  |
| 168        | GSM1112657_late2cell_6-2_expression.txt   | late2cell  | 3          |  |
| 171        | GSM1112660_late2cell_8-1_expression.txt   | late2cell  | 3          |  |
| 169        | GSM1112658_late2cell_7-1_expression.txt   | late2cell  | 3          |  |
| 167        | GSM1112656_late2cell_6-1_expression.txt   | late2cell  | 3          |  |
| 165        | GSM1112654_late2cell_5-1_expression.txt   | late2cell  | 3          |  |
| 170        | GSM1112659_late2cell_7-2_expression.txt   | late2cell  | 3          |  |
| 174        | GSM1112663_late2cell_9-2_expression.txt   | late2cell  | 3          |  |
| 166        | GSM1112655_late2cell_5-2_expression.txt   | late2cell  | 2          |  |

|     |                                                 |           |   |  |
|-----|-------------------------------------------------|-----------|---|--|
| 173 | GSM1112662_late2cell_9-1_expression.txt         | late2cell | 2 |  |
| 64  | GSM1112553_4cell_4-4_expression.txt             | 4cell     | 2 |  |
| 61  | GSM1112550_4cell_4-1_expression.txt             | 4cell     | 2 |  |
| 63  | GSM1112552_4cell_4-3_expression.txt             | 4cell     | 2 |  |
| 62  | GSM1112551_4cell_4-2_expression.txt             | 4cell     | 2 |  |
| 53  | GSM1112542_4cell_1-4_expression.txt             | 4cell     | 2 |  |
| 56  | GSM1112545_4cell_2-3_expression.txt             | 4cell     | 2 |  |
| 52  | GSM1112541_4cell_1-2_expression.txt             | 4cell     | 2 |  |
| 51  | GSM1112540_4cell_1-1_expression.txt             | 4cell     | 2 |  |
| 57  | GSM1112546_4cell_2-4_expression.txt             | 4cell     | 2 |  |
| 55  | GSM1112544_4cell_2-2_expression.txt             | 4cell     | 2 |  |
| 60  | GSM1112549_4cell_3-4_expression.txt             | 4cell     | 2 |  |
| 54  | GSM1112543_4cell_2-1_expression.txt             | 4cell     | 2 |  |
| 59  | GSM1112548_4cell_3-3_expression.txt             | 4cell     | 2 |  |
| 58  | GSM1112547_4cell_3-1_expression.txt             | 4cell     | 2 |  |
| 67  | GSM1112556_8cell_1-4_expression.txt             | 8cell     | 2 |  |
| 301 | GSM1278029_8cell_2pooled_split7b_expression.txt | 8cell     | 2 |  |
| 68  | GSM1112557_8cell_1-5_expression.txt             | 8cell     | 2 |  |
| 78  | GSM1112567_8cell_2-8_expression.txt             | 8cell     | 2 |  |
| 75  | GSM1112564_8cell_2-4_expression.txt             | 8cell     | 2 |  |
| 294 | GSM1278022_8cell_14-1_smartseq2_expression.txt  | 8cell     | 2 |  |
| 298 | GSM1278026_8cell_2pooled_split5a_expression.txt | 8cell     | 2 |  |
| 307 | GSM1278035_8cell_split4b_expression.txt         | 8cell     | 2 |  |
| 304 | GSM1278032_8cell_split3a_expression.txt         | 8cell     | 2 |  |
| 299 | GSM1278027_8cell_2pooled_split5b_expression.txt | 8cell     | 2 |  |
| 76  | GSM1112565_8cell_2-6_expression.txt             | 8cell     | 2 |  |
| 306 | GSM1278034_8cell_split4a_expression.txt         | 8cell     | 2 |  |
| 16  | GSM1112505_16cell_4-10_expression.txt           | 16cell    | 2 |  |
| 85  | GSM1112574_8cell_5-8_expression.txt             | 8cell     | 2 |  |
| 300 | GSM1278028_8cell_2pooled_split7a_expression.txt | 8cell     | 2 |  |
| 72  | GSM1112561_8cell_2-1_expression.txt             | 8cell     | 2 |  |
| 73  | GSM1112562_8cell_2-2_expression.txt             | 8cell     | 2 |  |
| 86  | GSM1112575_8cell_8-1_expression.txt             | 8cell     | 2 |  |
| 80  | GSM1112569_8cell_5-2_expression.txt             | 8cell     | 2 |  |
| 46  | GSM1112535_16cell_6-5_expression.txt            | 16cell    | 2 |  |
| 7   | GSM1112496_16cell_1-2_expression.txt            | 16cell    | 2 |  |
| 305 | GSM1278033_8cell_split3b_expression.txt         | 8cell     | 2 |  |
| 290 | GSM1278018_8cell_12-2_smartseq2_expression.txt  | 8cell     | 2 |  |
| 292 | GSM1278020_8cell_12-4_smartseq2_expression.txt  | 8cell     | 2 |  |
| 296 | GSM1278024_8cell_14-3_smartseq2_expression.txt  | 8cell     | 2 |  |
| 83  | GSM1112572_8cell_5-6_expression.txt             | 8cell     | 2 |  |
| 81  | GSM1112570_8cell_5-3_expression.txt             | 8cell     | 2 |  |
| 4   | GSM1112493_16cell_1-13_expression.txt           | 16cell    | 2 |  |
| 84  | GSM1112573_8cell_5-7_expression.txt             | 8cell     | 2 |  |
| 17  | GSM1112506_16cell_4-11_expression.txt           | 16cell    | 2 |  |
| 25  | GSM1112514_16cell_4-9_expression.txt            | 16cell    | 2 |  |
| 3   | GSM1112492_16cell_1-12_expression.txt           | 16cell    | 2 |  |
| 66  | GSM1112555_8cell_1-2_expression.txt             | 8cell     | 2 |  |
| 20  | GSM1112509_16cell_4-4_expression.txt            | 16cell    | 2 |  |
| 8   | GSM1112497_16cell_1-3_expression.txt            | 16cell    | 2 |  |

|     |                                                  |        |   |  |
|-----|--------------------------------------------------|--------|---|--|
| 302 | GSM1278030_8cell_2pooled_split9a_expression.txt  | 8cell  | 2 |  |
| 87  | GSM1112576_8cell_8-2_expression.txt              | 8cell  | 2 |  |
| 22  | GSM1112511_16cell_4-6_expression.txt             | 16cell | 2 |  |
| 19  | GSM1112508_16cell_4-3_expression.txt             | 16cell | 2 |  |
| 24  | GSM1112513_16cell_4-8_expression.txt             | 16cell | 2 |  |
| 91  | GSM1112580_8cell_8-7_expression.txt              | 8cell  | 2 |  |
| 1   | GSM1112490_16cell_1-10_expression.txt            | 16cell | 2 |  |
| 33  | GSM1112522_16cell_5-4_expression.txt             | 16cell | 2 |  |
| 21  | GSM1112510_16cell_4-5_expression.txt             | 16cell | 2 |  |
| 6   | GSM1112495_16cell_1-15_expression.txt            | 16cell | 2 |  |
| 2   | GSM1112491_16cell_1-11_expression.txt            | 16cell | 2 |  |
| 92  | GSM1112581_8cell_8-8_expression.txt              | 8cell  | 2 |  |
| 14  | GSM1112503_16cell_1-9_expression.txt             | 16cell | 2 |  |
| 289 | GSM1278017_8cell_12-1_smartseq2_expression.txt   | 8cell  | 2 |  |
| 5   | GSM1112494_16cell_1-14_expression.txt            | 16cell | 2 |  |
| 15  | GSM1112504_16cell_4-1_expression.txt             | 16cell | 2 |  |
| 65  | GSM1112554_8cell_1-1_expression.txt              | 8cell  | 2 |  |
| 11  | GSM1112500_16cell_1-6_expression.txt             | 16cell | 2 |  |
| 74  | GSM1112563_8cell_2-3_expression.txt              | 8cell  | 2 |  |
| 303 | GSM1278031_8cell_2pooled_split9b_expression.txt  | 8cell  | 2 |  |
| 89  | GSM1112578_8cell_8-4_expression.txt              | 8cell  | 2 |  |
| 293 | GSM1278021_8cell_13-1_smartseq2_expression.txt   | 8cell  | 2 |  |
| 77  | GSM1112566_8cell_2-7_expression.txt              | 8cell  | 2 |  |
| 82  | GSM1112571_8cell_5-4_expression.txt              | 8cell  | 2 |  |
| 297 | GSM1278025_8cell_14-4_smartseq2_expression.txt   | 8cell  | 2 |  |
| 90  | GSM1112579_8cell_8-6_expression.txt              | 8cell  | 2 |  |
| 69  | GSM1112558_8cell_1-6_expression.txt              | 8cell  | 2 |  |
| 295 | GSM1278023_8cell_14-2_smartseq2_expression.txt   | 8cell  | 2 |  |
| 10  | GSM1112499_16cell_1-5_expression.txt             | 16cell | 2 |  |
| 71  | GSM1112560_8cell_1-8_expression.txt              | 8cell  | 2 |  |
| 79  | GSM1112568_8cell_5-1_expression.txt              | 8cell  | 2 |  |
| 291 | GSM1278019_8cell_12-3_smartseq2_expression.txt   | 8cell  | 2 |  |
| 287 | GSM1278015_16cell_split2a_expression.txt         | 16cell | 2 |  |
| 9   | GSM1112498_16cell_1-4_expression.txt             | 16cell | 2 |  |
| 70  | GSM1112559_8cell_1-7_expression.txt              | 8cell  | 2 |  |
| 13  | GSM1112502_16cell_1-8_expression.txt             | 16cell | 2 |  |
| 29  | GSM1112518_16cell_5-12_expression.txt            | 16cell | 2 |  |
| 31  | GSM1112520_16cell_5-2_expression.txt             | 16cell | 2 |  |
| 12  | GSM1112501_16cell_1-7_expression.txt             | 16cell | 2 |  |
| 38  | GSM1112527_16cell_5-9_expression.txt             | 16cell | 2 |  |
| 30  | GSM1112519_16cell_5-13_expression.txt            | 16cell | 2 |  |
| 23  | GSM1112512_16cell_4-7_expression.txt             | 16cell | 2 |  |
| 44  | GSM1112533_16cell_6-3_expression.txt             | 16cell | 2 |  |
| 26  | GSM1112515_16cell_5-1_expression.txt             | 16cell | 2 |  |
| 32  | GSM1112521_16cell_5-3_expression.txt             | 16cell | 2 |  |
| 286 | GSM1278014_16cell_split1b_expression.txt         | 16cell | 2 |  |
| 282 | GSM1278010_16cell_2pooled_split6b_expression.txt | 16cell | 2 |  |
| 281 | GSM1278009_16cell_2pooled_split6a_expression.txt | 16cell | 2 |  |
| 28  | GSM1112517_16cell_5-11_expression.txt            | 16cell | 2 |  |
| 40  | GSM1112529_16cell_6-10_expression.txt            | 16cell | 2 |  |

|     |                                                  |            |   |  |
|-----|--------------------------------------------------|------------|---|--|
| 34  | GSM1112523_16cell.5-5_expression.txt             | 16cell     | 2 |  |
| 50  | GSM1112539_16cell.6-9_expression.txt             | 16cell     | 2 |  |
| 41  | GSM1112530_16cell.6-11_expression.txt            | 16cell     | 2 |  |
| 39  | GSM1112528_16cell.6-1_expression.txt             | 16cell     | 2 |  |
| 45  | GSM1112534_16cell.6-4_expression.txt             | 16cell     | 2 |  |
| 37  | GSM1112526_16cell.5-8_expression.txt             | 16cell     | 2 |  |
| 283 | GSM1278011_16cell.2pooled_split8a_expression.txt | 16cell     | 2 |  |
| 285 | GSM1278013_16cell.split1a_expression.txt         | 16cell     | 2 |  |
| 27  | GSM1112516_16cell.5-10_expression.txt            | 16cell     | 2 |  |
| 36  | GSM1112525_16cell.5-7_expression.txt             | 16cell     | 2 |  |
| 288 | GSM1278016_16cell.split2b_expression.txt         | 16cell     | 2 |  |
| 42  | GSM1112531_16cell.6-12_expression.txt            | 16cell     | 2 |  |
| 43  | GSM1112532_16cell.6-2_expression.txt             | 16cell     | 2 |  |
| 48  | GSM1112537_16cell.6-7_expression.txt             | 16cell     | 2 |  |
| 284 | GSM1278012_16cell.2pooled_split8b_expression.txt | 16cell     | 2 |  |
| 35  | GSM1112524_16cell.5-6_expression.txt             | 16cell     | 2 |  |
| 49  | GSM1112538_16cell.6-8_expression.txt             | 16cell     | 2 |  |
| 47  | GSM1112536_16cell.6-6_expression.txt             | 16cell     | 2 |  |
| 243 | GSM1112732_midblast.2-13_expression.txt          | midblast   | 1 |  |
| 240 | GSM1112729_midblast.2-10_expression.txt          | midblast   | 1 |  |
| 246 | GSM1112735_midblast.2-16_expression.txt          | midblast   | 1 |  |
| 248 | GSM1112737_midblast.2-18_expression.txt          | midblast   | 1 |  |
| 135 | GSM1112624_earlyblast.2-7_expression.txt         | earlyblast | 1 |  |
| 245 | GSM1112734_midblast.2-15_expression.txt          | midblast   | 1 |  |
| 128 | GSM1112617_earlyblast.2-19_expression.txt        | earlyblast | 1 |  |
| 151 | GSM1112640_earlyblast.3-9_expression.txt         | earlyblast | 1 |  |
| 130 | GSM1112619_earlyblast.2-22_expression.txt        | earlyblast | 1 |  |
| 155 | GSM1112644_earlyblast.4-14_expression.txt        | earlyblast | 1 |  |
| 153 | GSM1112642_earlyblast.4-12_expression.txt        | earlyblast | 1 |  |
| 252 | GSM1112741_midblast.2-3_expression.txt           | midblast   | 1 |  |
| 250 | GSM1112739_midblast.2-23_expression.txt          | midblast   | 1 |  |
| 122 | GSM1112611_earlyblast.2-1_expression.txt         | earlyblast | 1 |  |
| 244 | GSM1112733_midblast.2-14_expression.txt          | midblast   | 1 |  |
| 158 | GSM1112647_earlyblast.4-18_expression.txt        | earlyblast | 1 |  |
| 160 | GSM1112649_earlyblast.4-3_expression.txt         | earlyblast | 1 |  |
| 126 | GSM1112615_earlyblast.2-16_expression.txt        | earlyblast | 1 |  |
| 140 | GSM1112629_earlyblast.3-13_expression.txt        | earlyblast | 1 |  |
| 242 | GSM1112731_midblast.2-12_expression.txt          | midblast   | 1 |  |
| 129 | GSM1112618_earlyblast.2-2_expression.txt         | earlyblast | 1 |  |
| 162 | GSM1112651_earlyblast.4-6_expression.txt         | earlyblast | 1 |  |
| 157 | GSM1112646_earlyblast.4-17_expression.txt        | earlyblast | 1 |  |
| 255 | GSM1112744_midblast.2-6_expression.txt           | midblast   | 1 |  |
| 220 | GSM1112709_midblast.1-12_expression.txt          | midblast   | 1 |  |
| 146 | GSM1112635_earlyblast.3-3_expression.txt         | earlyblast | 1 |  |
| 143 | GSM1112632_earlyblast.3-16_expression.txt        | earlyblast | 1 |  |
| 137 | GSM1112626_earlyblast.3-1_expression.txt         | earlyblast | 1 |  |
| 147 | GSM1112636_earlyblast.3-4_expression.txt         | earlyblast | 1 |  |
| 251 | GSM1112740_midblast.2-24_expression.txt          | midblast   | 1 |  |
| 239 | GSM1112728_midblast.2-1_expression.txt           | midblast   | 1 |  |
| 148 | GSM1112637_earlyblast.3-6_expression.txt         | earlyblast | 1 |  |

|     |                                           |            |   |  |
|-----|-------------------------------------------|------------|---|--|
| 142 | GSM1112631_earlyblast_3-15_expression.txt | earlyblast | 1 |  |
| 144 | GSM1112633_earlyblast_3-17_expression.txt | earlyblast | 1 |  |
| 131 | GSM1112620_earlyblast_2-3_expression.txt  | earlyblast | 1 |  |
| 145 | GSM1112634_earlyblast_3-2_expression.txt  | earlyblast | 1 |  |
| 185 | GSM1112674_lateblast_1-24_expression.txt  | lateblast  | 1 |  |
| 187 | GSM1112676_lateblast_1-27_expression.txt  | lateblast  | 1 |  |
| 127 | GSM1112616_earlyblast_2-17_expression.txt | earlyblast | 1 |  |
| 163 | GSM1112652_earlyblast_4-8_expression.txt  | earlyblast | 1 |  |
| 232 | GSM1112721_midblast_1-24_expression.txt   | midblast   | 1 |  |
| 176 | GSM1112665_lateblast_1-11_expression.txt  | lateblast  | 1 |  |
| 141 | GSM1112630_earlyblast_3-14_expression.txt | earlyblast | 1 |  |
| 133 | GSM1112622_earlyblast_2-5_expression.txt  | earlyblast | 1 |  |
| 134 | GSM1112623_earlyblast_2-6_expression.txt  | earlyblast | 1 |  |
| 150 | GSM1112639_earlyblast_3-8_expression.txt  | earlyblast | 1 |  |
| 257 | GSM1112746_midblast_2-8_expression.txt    | midblast   | 1 |  |
| 221 | GSM1112710_midblast_1-13_expression.txt   | midblast   | 1 |  |
| 253 | GSM1112742_midblast_2-4_expression.txt    | midblast   | 1 |  |
| 132 | GSM1112621_earlyblast_2-4_expression.txt  | earlyblast | 1 |  |
| 227 | GSM1112716_midblast_1-19_expression.txt   | midblast   | 1 |  |

Table 2: Branch 1.1

| node.label | cell.name                                 | cell.group | main.topic | topics |
|------------|-------------------------------------------|------------|------------|--------|
| 247        | GSM1112736_midblast_2-17_expression.txt   | midblast   | 1          |        |
| 258        | GSM1112747_midblast_2-9_expression.txt    | midblast   | 1          |        |
| 164        | GSM1112653_earlyblast_4-9_expression.txt  | earlyblast | 1          |        |
| 219        | GSM1112708_midblast_1-11_expression.txt   | midblast   | 1          |        |
| 256        | GSM1112745_midblast_2-7_expression.txt    | midblast   | 1          |        |
| 225        | GSM1112714_midblast_1-17_expression.txt   | midblast   | 1          |        |
| 156        | GSM1112645_earlyblast_4-16_expression.txt | earlyblast | 1          |        |
| 154        | GSM1112643_earlyblast_4-13_expression.txt | earlyblast | 1          |        |
| 236        | GSM1112725_midblast_1-6_expression.txt    | midblast   | 1          |        |
| 125        | GSM1112614_earlyblast_2-15_expression.txt | earlyblast | 1          |        |
| 224        | GSM1112713_midblast_1-16_expression.txt   | midblast   | 1          |        |
| 229        | GSM1112718_midblast_1-20_expression.txt   | midblast   | 1          |        |
| 235        | GSM1112724_midblast_1-5_expression.txt    | midblast   | 1          |        |
| 231        | GSM1112720_midblast_1-23_expression.txt   | midblast   | 1          |        |
| 261        | GSM1112750_midblast_3-11_expression.txt   | midblast   | 1          |        |
| 234        | GSM1112723_midblast_1-4_expression.txt    | midblast   | 1          |        |
| 218        | GSM1112707_midblast_1-10_expression.txt   | midblast   | 1          |        |
| 180        | GSM1112669_lateblast_1-19_expression.txt  | lateblast  | 1          |        |
| 223        | GSM1112712_midblast_1-15_expression.txt   | midblast   | 1          |        |
| 222        | GSM1112711_midblast_1-14_expression.txt   | midblast   | 1          |        |
| 263        | GSM1112752_midblast_3-13_expression.txt   | midblast   | 1          |        |
| 138        | GSM1112627_earlyblast_3-10_expression.txt | earlyblast | 1          |        |
| 159        | GSM1112648_earlyblast_4-2_expression.txt  | earlyblast | 1          |        |
| 238        | GSM1112727_midblast_1-9_expression.txt    | midblast   | 1          |        |
| 152        | GSM1112641_earlyblast_4-1_expression.txt  | earlyblast | 1          |        |
| 175        | GSM1112664_lateblast_1-10_expression.txt  | lateblast  | 1          |        |
| 217        | GSM1112706_midblast_1-1_expression.txt    | midblast   | 1          |        |

|     |                                           |            |   |                                                                                       |
|-----|-------------------------------------------|------------|---|---------------------------------------------------------------------------------------|
| 139 | GSM1112628_earlyblast_3-12_expression.txt | earlyblast | 1 |    |
| 274 | GSM1112763_midblast_3-7_expression.txt    | midblast   | 1 |    |
| 237 | GSM1112726_midblast_1-8_expression.txt    | midblast   | 1 |    |
| 124 | GSM1112613_earlyblast_2-12_expression.txt | earlyblast | 1 |    |
| 136 | GSM1112625_earlyblast_2-8_expression.txt  | earlyblast | 1 |    |
| 149 | GSM1112638_earlyblast_3-7_expression.txt  | earlyblast | 1 |    |
| 228 | GSM1112717_midblast_1-2_expression.txt    | midblast   | 1 |    |
| 266 | GSM1112755_midblast_3-17_expression.txt   | midblast   | 1 |    |
| 123 | GSM1112612_earlyblast_2-10_expression.txt | earlyblast | 1 |    |
| 193 | GSM1112682_lateblast_1-9_expression.txt   | lateblast  | 1 |    |
| 275 | GSM1112764_midblast_3-8_expression.txt    | midblast   | 1 |    |
| 272 | GSM1112761_midblast_3-5_expression.txt    | midblast   | 1 |    |
| 186 | GSM1112675_lateblast_1-26_expression.txt  | lateblast  | 1 |    |
| 183 | GSM1112672_lateblast_1-21_expression.txt  | lateblast  | 1 |    |
| 161 | GSM1112650_earlyblast_4-5_expression.txt  | earlyblast | 1 |    |
| 226 | GSM1112715_midblast_1-18_expression.txt   | midblast   | 1 |    |
| 269 | GSM1112758_midblast_3-23_expression.txt   | midblast   | 1 |    |
| 267 | GSM1112756_midblast_3-18_expression.txt   | midblast   | 1 |    |
| 201 | GSM1112690_lateblast_2-5_expression.txt   | lateblast  | 1 |    |
| 198 | GSM1112687_lateblast_2-17_expression.txt  | lateblast  | 1 |    |
| 268 | GSM1112757_midblast_3-2_expression.txt    | midblast   | 1 |    |
| 273 | GSM1112762_midblast_3-6_expression.txt    | midblast   | 1 |    |
| 179 | GSM1112668_lateblast_1-16_expression.txt  | lateblast  | 1 |    |
| 271 | GSM1112760_midblast_3-4_expression.txt    | midblast   | 1 |    |
| 189 | GSM1112678_lateblast_1-5_expression.txt   | lateblast  | 1 |  |
| 177 | GSM1112666_lateblast_1-13_expression.txt  | lateblast  | 1 |  |
| 265 | GSM1112754_midblast_3-15_expression.txt   | midblast   | 1 |  |
| 230 | GSM1112719_midblast_1-22_expression.txt   | midblast   | 1 |  |
| 199 | GSM1112688_lateblast_2-2_expression.txt   | lateblast  | 1 |  |
| 233 | GSM1112722_midblast_1-3_expression.txt    | midblast   | 1 |  |
| 270 | GSM1112759_midblast_3-3_expression.txt    | midblast   | 1 |  |
| 262 | GSM1112751_midblast_3-12_expression.txt   | midblast   | 1 |  |
| 188 | GSM1112677_lateblast_1-4_expression.txt   | lateblast  | 1 |  |
| 260 | GSM1112749_midblast_3-10_expression.txt   | midblast   | 1 |  |
| 178 | GSM1112667_lateblast_1-14_expression.txt  | lateblast  | 1 |  |
| 202 | GSM1112691_lateblast_2-7_expression.txt   | lateblast  | 1 |  |
| 184 | GSM1112673_lateblast_1-23_expression.txt  | lateblast  | 1 |  |
| 264 | GSM1112753_midblast_3-14_expression.txt   | midblast   | 1 |  |
| 276 | GSM1112765_midblast_3-9_expression.txt    | midblast   | 1 |  |
| 259 | GSM1112748_midblast_3-1_expression.txt    | midblast   | 1 |  |
| 182 | GSM1112671_lateblast_1-20_expression.txt  | lateblast  | 1 |  |
| 194 | GSM1112683_lateblast_2-1_expression.txt   | lateblast  | 1 |  |
| 190 | GSM1112679_lateblast_1-6_expression.txt   | lateblast  | 1 |  |
| 197 | GSM1112686_lateblast_2-16_expression.txt  | lateblast  | 1 |  |
| 191 | GSM1112680_lateblast_1-7_expression.txt   | lateblast  | 1 |  |
| 195 | GSM1112684_lateblast_2-12_expression.txt  | lateblast  | 1 |  |
| 200 | GSM1112689_lateblast_2-3_expression.txt   | lateblast  | 1 |  |
| 203 | GSM1112692_lateblast_2-8_expression.txt   | lateblast  | 1 |  |
| 196 | GSM1112685_lateblast_2-14_expression.txt  | lateblast  | 1 |  |
| 192 | GSM1112681_lateblast_1-8_expression.txt   | lateblast  | 1 |  |

|     |                                         |           |   |                                                                                     |
|-----|-----------------------------------------|-----------|---|-------------------------------------------------------------------------------------|
| 181 | GSM1112670_lateblast_1-2_expression.txt | lateblast | 1 |  |
| 204 | GSM1112693_lateblast_2-9_expression.txt | lateblast | 1 |  |

Table 3: Branch 1.2

| node.label | cell.name                                       | cell.group | main.topic | topics                                                                                |
|------------|-------------------------------------------------|------------|------------|---------------------------------------------------------------------------------------|
| 254        | GSM1112743_midblast_2-5_expression.txt          | midblast   | 1          |    |
| 241        | GSM1112730_midblast_2-11_expression.txt         | midblast   | 1          |    |
| 249        | GSM1112738_midblast_2-2_expression.txt          | midblast   | 1          |    |
| 88         | GSM1112577_8cell_8-3_expression.txt             | 8cell      | 1          |    |
| 314        | GSM1278042_fibroblast_20_BxC_expression.txt     | fibroblast | 4          |    |
| 313        | GSM1278041_fibroblast_19_BxC_expression.txt     | fibroblast | 1          |    |
| 315        | GSM1278043_fibroblast_21_BxC_expression.txt     | fibroblast | 4          |    |
| 310        | GSM1278038_fibroblast_15_CxB_expression.txt     | fibroblast | 1          |    |
| 316        | GSM1278044_fibroblast_22_BxC_expression.txt     | fibroblast | 4          |    |
| 311        | GSM1278039_fibroblast_16_CxB_expression.txt     | fibroblast | 4          |    |
| 317        | GSM1278045_fibroblast_9_CxB_expression.txt      | fibroblast | 4          |    |
| 308        | GSM1278036_fibroblast_13_CxB_expression.txt     | fibroblast | 4          |    |
| 312        | GSM1278040_fibroblast_17_BxC_expression.txt     | fibroblast | 4          |    |
| 309        | GSM1278037_fibroblast_14_CxB_expression.txt     | fibroblast | 4          |    |
| 98         | GSM1112587_BXC_1ng_liver_RNA_1_expression.txt   | BXC        | 4          |    |
| 99         | GSM1112588_BXC_30pg_liver_RNA_0r_expression.txt | BXC        | 4          |    |
| 97         | GSM1112586_BXC_1ng_liver_RNA_0r_expression.txt  | BXC        | 4          |    |
| 93         | GSM1112582_BXC_100pg_liver_RNA_1_expression.txt | BXC        | 4          |    |
| 94         | GSM1112583_BXC_100pg_liver_RNA_2_expression.txt | BXC        | 4          |   |
| 100        | GSM1112589_BXC_30pg_liver_RNA_2_expression.txt  | BXC        | 4          |  |
| 95         | GSM1112584_BXC_10pg_liver_RNA_1_expression.txt  | BXC        | 4          |  |
| 96         | GSM1112585_BXC_10pg_liver_RNA_2_expression.txt  | BXC        | 4          |  |
| 103        | GSM1112592_BXC_liver_cell_4_expression.txt      | BXC        | 4          |  |
| 101        | GSM1112590_BXC_liver_cell_1_expression.txt      | BXC        | 4          |  |
| 102        | GSM1112591_BXC_liver_cell_2_expression.txt      | BXC        | 4          |  |
| 104        | GSM1112593_BXC_liver_cell_5_expression.txt      | BXC        | 4          |  |
| 105        | GSM1112594_BXC_liver_cell_6_expression.txt      | BXC        | 4          |  |
