# Supplementary material for: CellTree: an R/bioconductor package to infer the hierarchical structure of cell populations from single-cell RNA-seq data
Source: PubMed Central journal article supplement (PMC5020541; doi:10.1186/s12859-016-1175-6), 2016-09-13
Supplement: 12859_2016_1175_MOESM11_ESM.pdf [file 12859_2016_1175_MOESM11_ESM.pdf]

## Ordered cells by branch

Legend:  Topic #1  Topic #2  Topic #3  Topic #4

Table 1: Branch 1

| node.label | cell.name      | cell.group           | main.topic | topics                                                                                |
|------------|----------------|----------------------|------------|---------------------------------------------------------------------------------------|
| 96         | 1772067065_A02 | interneurons         | 1          |    |
| 1630       | 1772060226_H05 | astrocytes_ependymal | 1          |    |
| 275        | 1772060224_B06 | pyramidal SS         | 1          |    |
| 135        | 1772071015_A01 | interneurons         | 1          |    |
| 347        | 1772062109_F09 | pyramidal SS         | 1          |    |
| 413        | 1772071014_H02 | pyramidal SS         | 1          |    |
| 1634       | 1772058177_G08 | astrocytes_ependymal | 1          |    |
| 1633       | 1772062113_C04 | astrocytes_ependymal | 1          |    |
| 431        | 1772063061_H01 | pyramidal SS         | 1          |    |
| 404        | 1772063074_E06 | pyramidal SS         | 1          |    |
| 120        | 1772058148_H04 | interneurons         | 1          |    |
| 1686       | 1772071017_A07 | endothelial-mural    | 1          |    |
| 544        | 1772062109_C04 | pyramidal SS         | 1          |    |
| 76         | 1772058148_D08 | interneurons         | 1          |    |
| 456        | 1772063078_C04 | pyramidal SS         | 1          |    |
| 530        | 1772063077_B02 | pyramidal SS         | 1          |    |
| 349        | 1772071040_H03 | pyramidal SS         | 1          |  |
| 152        | 1772063074_E11 | interneurons         | 1          |  |
| 405        | 1772063064_H01 | pyramidal SS         | 1          |  |
| 50         | 1772067065_D01 | interneurons         | 1          |  |
| 540        | 1772062111_B08 | pyramidal SS         | 1          |  |
| 39         | 1772071015_F03 | interneurons         | 1          |  |
| 538        | 1772062116_E12 | pyramidal SS         | 1          |  |
| 386        | 1772062115_D01 | pyramidal SS         | 1          |  |
| 504        | 1772062114_B06 | pyramidal SS         | 1          |  |
| 10         | 1772071015_C11 | interneurons         | 1          |  |
| 37         | 1772071017_G11 | interneurons         | 1          |  |
| 490        | 1772060224_F11 | pyramidal SS         | 1          |  |
| 41         | 1772071014_G10 | interneurons         | 1          |  |
| 499        | 1772063068_C02 | pyramidal SS         | 1          |  |
| 527        | 1772060240_A05 | pyramidal SS         | 1          |  |
| 119        | 1772067065_F08 | interneurons         | 1          |  |
| 526        | 1772060240_B09 | pyramidal SS         | 1          |  |
| 137        | 1772063070_B10 | interneurons         | 1          |  |
| 416        | 1772063078_E02 | pyramidal SS         | 1          |  |
| 1623       | 1772063078_D03 | astrocytes_ependymal | 1          |  |
| 522        | 1772063063_A02 | pyramidal SS         | 1          |  |
| 355        | 1772062116_B02 | pyramidal SS         | 1          |  |
| 510        | 1772063068_B07 | pyramidal SS         | 1          |  |
| 1594       | 1772063063_E01 | astrocytes_ependymal | 1          |  |
| 460        | 1772063062_A03 | pyramidal SS         | 1          |  |
| 1628       | 1772063070_B07 | astrocytes_ependymal | 1          |  |

|      |                |                      |   |                                                                                       |
|------|----------------|----------------------|---|---------------------------------------------------------------------------------------|
| 1612 | 1772067070_B12 | astrocytes_ependymal | 1 |    |
| 179  | 1772067064_H09 | pyramidal SS         | 1 |    |
| 3    | 1772071017_A05 | interneurons         | 1 |    |
| 113  | 1772071015_A05 | interneurons         | 1 |    |
| 1637 | 1772063077_D01 | astrocytes_ependymal | 1 |    |
| 1646 | 1772071041_G06 | astrocytes_ependymal | 1 |    |
| 42   | 1772067066_B07 | interneurons         | 1 |    |
| 367  | 1772067070_B11 | pyramidal SS         | 1 |    |
| 550  | 1772063063_D03 | pyramidal SS         | 1 |    |
| 189  | 1772067063_B02 | pyramidal SS         | 1 |    |
| 8    | 1772071014_E04 | interneurons         | 1 |    |
| 38   | 1772071014_H12 | interneurons         | 1 |    |
| 44   | 1772071015_F07 | interneurons         | 1 |    |
| 46   | 1772071015_C10 | interneurons         | 1 |    |
| 108  | 1772071015_C09 | interneurons         | 1 |    |
| 343  | 1772071015_D07 | pyramidal SS         | 1 |    |
| 33   | 1772071015_B04 | interneurons         | 1 |    |
| 115  | 1772067065_A01 | interneurons         | 1 |    |
| 293  | 1772063070_B11 | pyramidal SS         | 1 |    |
| 35   | 1772067065_D06 | interneurons         | 1 |    |
| 117  | 1772071017_H06 | interneurons         | 1 |    |
| 1    | 1772071015_C02 | interneurons         | 1 |    |
| 155  | 1772071017_D01 | interneurons         | 1 |    |
| 34   | 1772071014_D03 | interneurons         | 1 |    |
| 313  | 1772063063_D11 | pyramidal SS         | 1 |  |
| 493  | 1772063074_C06 | pyramidal SS         | 1 |  |
| 43   | 1772067065_G01 | interneurons         | 1 |  |
| 158  | 1772071014_C04 | interneurons         | 1 |  |
| 40   | 1772071015_B11 | interneurons         | 1 |  |
| 112  | 1772067065_G10 | interneurons         | 1 |  |
| 32   | 1772071017_B03 | interneurons         | 1 |  |
| 51   | 1772071015_A02 | interneurons         | 1 |  |
| 244  | 1772063064_D02 | pyramidal SS         | 1 |  |
| 31   | 1772071014_A07 | interneurons         | 1 |  |
| 104  | 1772071015_H07 | interneurons         | 1 |  |
| 442  | 1772063064_C02 | pyramidal SS         | 1 |  |
| 48   | 1772067065_A11 | interneurons         | 1 |  |
| 52   | 1772071014_F01 | interneurons         | 1 |  |
| 114  | 1772067065_B10 | interneurons         | 1 |  |
| 151  | 1772063068_F12 | interneurons         | 1 |  |
| 125  | 1772067066_E02 | interneurons         | 1 |  |
| 136  | 1772071017_H10 | interneurons         | 1 |  |
| 106  | 1772071014_A06 | interneurons         | 1 |  |
| 18   | 1772071017_E06 | interneurons         | 1 |  |
| 4    | 1772071014_B06 | interneurons         | 1 |  |
| 381  | 1772060240_B10 | pyramidal SS         | 1 |  |
| 6    | 1772071017_E02 | interneurons         | 1 |  |
| 131  | 1772067066_D04 | interneurons         | 1 |  |
| 5    | 1772067065_H06 | interneurons         | 1 |  |
| 132  | 1772067065_G12 | interneurons         | 1 |  |

|     |                |              |   |                                                                                       |
|-----|----------------|--------------|---|---------------------------------------------------------------------------------------|
| 159 | 1772071017_A08 | interneurons | 1 |    |
| 9   | 1772071015_D04 | interneurons | 1 |    |
| 133 | 1772071017_G05 | interneurons | 1 |    |
| 55  | 1772071017_D07 | interneurons | 1 |    |
| 190 | 1772060240_A07 | pyramidal SS | 1 |    |
| 230 | 1772067064_F02 | pyramidal SS | 1 |    |
| 14  | 1772071017_A09 | interneurons | 1 |    |
| 270 | 1772067074_F12 | pyramidal SS | 1 |    |
| 68  | 1772071015_E06 | interneurons | 1 |    |
| 153 | 1772067073_C01 | interneurons | 1 |    |
| 175 | 1772067063_E09 | pyramidal SS | 1 |    |
| 25  | 1772071015_B08 | interneurons | 1 |    |
| 314 | 1772062115_C11 | pyramidal SS | 1 |    |
| 520 | 1772060240_D04 | pyramidal SS | 1 |    |
| 377 | 1772067070_H11 | pyramidal SS | 1 |    |
| 363 | 1772067063_B09 | pyramidal SS | 1 |    |
| 397 | 1772071041_B12 | pyramidal SS | 1 |    |
| 59  | 1772071015_H11 | interneurons | 1 |    |
| 22  | 1772071014_B04 | interneurons | 1 |    |
| 213 | 1772067074_D05 | pyramidal SS | 1 |    |
| 559 | 1772066104_H07 | pyramidal SS | 1 |    |
| 63  | 1772071017_B09 | interneurons | 1 |    |
| 346 | 1772067066_C03 | pyramidal SS | 1 |    |
| 361 | 1772071040_F06 | pyramidal SS | 1 |   |
| 66  | 1772071015_G04 | interneurons | 1 |  |
| 149 | 1772071014_B10 | interneurons | 1 |  |
| 198 | 1772067070_A03 | pyramidal SS | 1 |  |
| 75  | 1772071017_E04 | interneurons | 1 |  |
| 26  | 1772071014_C11 | interneurons | 1 |  |
| 216 | 1772071017_D11 | pyramidal SS | 1 |  |
| 557 | 1772067069_D09 | pyramidal SS | 1 |  |
| 176 | 1772067070_D04 | pyramidal SS | 1 |  |
| 123 | 1772067065_G11 | interneurons | 1 |  |
| 356 | 1772071041_D08 | pyramidal SS | 1 |  |
| 203 | 1772067070_G11 | pyramidal SS | 1 |  |
| 553 | 1772071017_E11 | pyramidal SS | 1 |  |
| 551 | 1772071041_B09 | pyramidal SS | 1 |  |
| 58  | 1772071017_C07 | interneurons | 1 |  |
| 36  | 1772067066_H08 | interneurons | 1 |  |
| 212 | 1772067070_F03 | pyramidal SS | 1 |  |
| 7   | 1772067065_B07 | interneurons | 1 |  |
| 30  | 1772071017_B11 | interneurons | 1 |  |
| 56  | 1772071017_A11 | interneurons | 1 |  |
| 2   | 1772071017_G12 | interneurons | 1 |  |
| 57  | 1772071017_B01 | interneurons | 1 |  |
| 134 | 1772071017_D12 | interneurons | 1 |  |
| 29  | 1772071014_H11 | interneurons | 1 |  |
| 263 | 1772063065_A10 | pyramidal SS | 1 |  |
| 167 | 1772067073_F04 | pyramidal SS | 1 |  |
| 164 | 1772071014_E02 | interneurons | 1 |  |

|     |                |              |   |                                                                                       |
|-----|----------------|--------------|---|---------------------------------------------------------------------------------------|
| 60  | 1772071014_A05 | interneurons | 1 |    |
| 144 | 1772071015_G09 | interneurons | 1 |    |
| 392 | 1772067066_G02 | pyramidal SS | 1 |    |
| 162 | 1772071017_A06 | interneurons | 1 |    |
| 542 | 1772067070_C07 | pyramidal SS | 1 |    |
| 16  | 1772071017_A03 | interneurons | 1 |    |
| 107 | 1772071015_A11 | interneurons | 1 |    |
| 186 | 1772067064_D02 | pyramidal SS | 1 |    |
| 399 | 1772067073_F02 | pyramidal SS | 1 |    |
| 284 | 1772060240_F12 | pyramidal SS | 1 |    |
| 339 | 1772063068_G04 | pyramidal SS | 1 |    |
| 374 | 1772071040_E02 | pyramidal SS | 1 |    |
| 13  | 1772071017_F09 | interneurons | 1 |    |
| 344 | 1772071015_D08 | pyramidal SS | 1 |    |
| 69  | 1772067064_E04 | interneurons | 1 |    |
| 71  | 1772071014_F06 | interneurons | 1 |    |
| 336 | 1772063062_C04 | pyramidal SS | 1 |    |
| 555 | 1772060225_G12 | pyramidal SS | 1 |    |
| 488 | 1772063065_B10 | pyramidal SS | 1 |    |
| 290 | 1772063070_E01 | pyramidal SS | 1 |    |
| 243 | 1772071041_H10 | pyramidal SS | 1 |    |
| 482 | 1772067073_D12 | pyramidal SS | 1 |    |
| 127 | 1772067065_B09 | interneurons | 1 |    |
| 21  | 1772071014_E06 | interneurons | 1 |   |
| 180 | 1772071040_B01 | pyramidal SS | 1 |  |
| 214 | 1772067069_G03 | pyramidal SS | 1 |  |
| 170 | 1772067063_C05 | pyramidal SS | 1 |  |
| 245 | 1772067074_C05 | pyramidal SS | 1 |  |
| 210 | 1772067064_G02 | pyramidal SS | 1 |  |
| 259 | 1772067073_G09 | pyramidal SS | 1 |  |
| 562 | 1772066104_A04 | pyramidal SS | 1 |  |
| 11  | 1772071017_D04 | interneurons | 1 |  |
| 315 | 1772071041_C10 | pyramidal SS | 1 |  |
| 28  | 1772067065_F11 | interneurons | 1 |  |
| 477 | 1772071041_E08 | pyramidal SS | 1 |  |
| 65  | 1772067065_A12 | interneurons | 1 |  |
| 294 | 1772071041_A05 | pyramidal SS | 1 |  |
| 295 | 1772060240_H05 | pyramidal SS | 1 |  |
| 248 | 1772067070_D06 | pyramidal SS | 1 |  |
| 177 | 1772067064_C07 | pyramidal SS | 1 |  |
| 165 | 1772067069_H02 | pyramidal SS | 1 |  |
| 77  | 1772067065_F07 | interneurons | 1 |  |
| 191 | 1772067073_A01 | pyramidal SS | 1 |  |
| 172 | 1772067064_C12 | pyramidal SS | 1 |  |
| 224 | 1772071041_E01 | pyramidal SS | 1 |  |
| 221 | 1772067073_F08 | pyramidal SS | 1 |  |
| 297 | 1772063065_G10 | pyramidal SS | 1 |  |
| 332 | 1772066104_F10 | pyramidal SS | 1 |  |
| 27  | 1772067066_E10 | interneurons | 1 |  |
| 328 | 1772063065_D02 | pyramidal SS | 1 |  |

|     |                |              |   |                                                                                       |
|-----|----------------|--------------|---|---------------------------------------------------------------------------------------|
| 70  | 1772071015_C01 | interneurons | 1 |    |
| 266 | 1772063068_F07 | pyramidal SS | 1 |    |
| 500 | 1772063068_E08 | pyramidal SS | 1 |    |
| 12  | 1772071017_D06 | interneurons | 1 |    |
| 365 | 1772067073_B06 | pyramidal SS | 1 |    |
| 122 | 1772067065_B12 | interneurons | 1 |    |
| 389 | 1772067070_D10 | pyramidal SS | 1 |    |
| 62  | 1772071017_C08 | interneurons | 1 |    |
| 205 | 1772067069_G06 | pyramidal SS | 1 |    |
| 24  | 1772071017_E10 | interneurons | 1 |    |
| 318 | 1772067069_C05 | pyramidal SS | 1 |    |
| 200 | 1772067064_B05 | pyramidal SS | 1 |    |
| 519 | 1772060240_E09 | pyramidal SS | 1 |    |
| 283 | 1772071041_A06 | pyramidal SS | 1 |    |
| 319 | 1772063065_C09 | pyramidal SS | 1 |    |
| 171 | 1772067069_C12 | pyramidal SS | 1 |    |
| 199 | 1772071017_C06 | pyramidal SS | 1 |    |
| 74  | 1772071014_E05 | interneurons | 1 |    |
| 219 | 1772071041_D09 | pyramidal SS | 1 |    |
| 390 | 1772071040_A01 | pyramidal SS | 1 |    |
| 480 | 1772067070_F11 | pyramidal SS | 1 |    |
| 225 | 1772071041_G07 | pyramidal SS | 1 |    |
| 322 | 1772067073_B04 | pyramidal SS | 1 |    |
| 139 | 1772071015_E10 | interneurons | 1 |    |
| 474 | 1772067074_D06 | pyramidal SS | 1 |  |
| 187 | 1772067069_H10 | pyramidal SS | 1 |  |
| 128 | 1772067065_F10 | interneurons | 1 |  |
| 211 | 1772071040_E01 | pyramidal SS | 1 |  |
| 547 | 1772071041_C06 | pyramidal SS | 1 |  |
| 67  | 1772067066_B02 | interneurons | 1 |  |
| 157 | 1772071015_E08 | interneurons | 1 |  |
| 215 | 1772067070_E11 | pyramidal SS | 1 |  |
| 148 | 1772071017_C10 | interneurons | 1 |  |
| 257 | 1772067063_B12 | pyramidal SS | 1 |  |
| 252 | 1772071041_C05 | pyramidal SS | 1 |  |
| 298 | 1772067074_D10 | pyramidal SS | 1 |  |
| 253 | 1772067070_G12 | pyramidal SS | 1 |  |
| 292 | 1772063068_H12 | pyramidal SS | 1 |  |
| 183 | 1772067069_D10 | pyramidal SS | 1 |  |
| 161 | 1772067065_A08 | interneurons | 1 |  |
| 278 | 1772071040_G09 | pyramidal SS | 1 |  |
| 305 | 1772071041_B01 | pyramidal SS | 1 |  |
| 73  | 1772071017_C05 | interneurons | 1 |  |
| 126 | 1772067066_A11 | interneurons | 1 |  |
| 335 | 1772067073_F10 | pyramidal SS | 1 |  |
| 208 | 1772067066_A06 | pyramidal SS | 1 |  |
| 188 | 1772071017_G01 | pyramidal SS | 1 |  |
| 209 | 1772071040_G08 | pyramidal SS | 1 |  |
| 251 | 1772067074_F03 | pyramidal SS | 1 |  |
| 142 | 1772071015_F05 | interneurons | 1 |  |

|     |                |              |   |                                                                                       |
|-----|----------------|--------------|---|---------------------------------------------------------------------------------------|
| 178 | 1772067069_A11 | pyramidal SS | 1 |    |
| 324 | 1772071040_H01 | pyramidal SS | 1 |    |
| 535 | 1772067069_B11 | pyramidal SS | 1 |    |
| 260 | 1772067069_E04 | pyramidal SS | 1 |    |
| 197 | 1772067070_C01 | pyramidal SS | 1 |    |
| 227 | 1772071041_H09 | pyramidal SS | 1 |    |
| 545 | 1772071017_G07 | pyramidal SS | 1 |    |
| 124 | 1772067066_A10 | interneurons | 1 |    |
| 541 | 1772071040_H11 | pyramidal SS | 1 |    |
| 373 | 1772067070_G04 | pyramidal SS | 1 |    |
| 193 | 1772067074_A06 | pyramidal SS | 1 |    |
| 552 | 1772067066_D09 | pyramidal SS | 1 |    |
| 207 | 1772071041_H11 | pyramidal SS | 1 |    |
| 543 | 1772071017_A02 | pyramidal SS | 1 |    |
| 226 | 1772071041_G03 | pyramidal SS | 1 |    |
| 366 | 1772067073_G04 | pyramidal SS | 1 |    |
| 376 | 1772071040_B06 | pyramidal SS | 1 |    |
| 375 | 1772071041_D11 | pyramidal SS | 1 |    |
| 220 | 1772071041_H12 | pyramidal SS | 1 |    |
| 546 | 1772067074_A09 | pyramidal SS | 1 |    |
| 258 | 1772067063_H04 | pyramidal SS | 1 |    |
| 554 | 1772071017_B07 | pyramidal SS | 1 |    |
| 53  | 1772071015_D06 | interneurons | 1 |    |
| 537 | 1772071040_D07 | pyramidal SS | 1 |    |
| 228 | 1772071041_G08 | pyramidal SS | 1 |    |
| 237 | 1772071041_A04 | pyramidal SS | 1 |   |
| 163 | 1772071014_F12 | interneurons | 1 |  |
| 17  | 1772071017_F07 | interneurons | 1 |  |
| 279 | 1772071041_E10 | pyramidal SS | 1 |  |
| 181 | 1772067064_B04 | pyramidal SS | 1 |  |
| 274 | 1772063065_F03 | pyramidal SS | 1 |  |
| 539 | 1772067070_D03 | pyramidal SS | 1 |  |
| 395 | 1772067070_D05 | pyramidal SS | 1 |  |
| 471 | 1772063071_E09 | pyramidal SS | 1 |  |
| 166 | 1772063071_B07 | pyramidal SS | 1 |  |
| 173 | 1772071041_F07 | pyramidal SS | 1 |  |
| 202 | 1772067064_C02 | pyramidal SS | 1 |  |
| 271 | 1772067064_A01 | pyramidal SS | 1 |  |
| 276 | 1772071041_H05 | pyramidal SS | 1 |  |
| 15  | 1772071015_C08 | interneurons | 1 |  |
| 302 | 1772067074_F10 | pyramidal SS | 1 |  |
| 352 | 1772067073_E06 | pyramidal SS | 1 |  |
| 204 | 1772067074_F07 | pyramidal SS | 1 |  |
| 528 | 1772060240_G02 | pyramidal SS | 1 |  |
| 64  | 1772067066_A09 | interneurons | 1 |  |
| 201 | 1772067073_C12 | pyramidal SS | 1 |  |
| 334 | 1772063068_H01 | pyramidal SS | 1 |  |
| 308 | 1772063065_C08 | pyramidal SS | 1 |  |
| 312 | 1772060240_D06 | pyramidal SS | 1 |  |
| 61  | 1772071017_A10 | interneurons | 1 |  |

|     |                |              |   |                                                                                       |
|-----|----------------|--------------|---|---------------------------------------------------------------------------------------|
| 141 | 1772071041_B06 | interneurons | 1 |    |
| 20  | 1772071017_B05 | interneurons | 1 |    |
| 169 | 1772067066_E04 | pyramidal SS | 1 |    |
| 536 | 1772071040_C06 | pyramidal SS | 1 |    |
| 19  | 1772067066_C10 | interneurons | 1 |    |
| 23  | 1772067066_B09 | interneurons | 1 |    |
| 255 | 1772067074_B01 | pyramidal SS | 1 |    |
| 362 | 1772067074_G06 | pyramidal SS | 1 |    |
| 192 | 1772067064_B01 | pyramidal SS | 1 |    |
| 359 | 1772067074_A02 | pyramidal SS | 1 |    |
| 518 | 1772060240_E07 | pyramidal SS | 1 |    |
| 300 | 1772063065_D12 | pyramidal SS | 1 |    |
| 265 | 1772067069_F05 | pyramidal SS | 1 |    |
| 441 | 1772063068_F09 | pyramidal SS | 1 |    |
| 345 | 1772067064_A12 | pyramidal SS | 1 |    |
| 301 | 1772063065_B02 | pyramidal SS | 1 |    |
| 231 | 1772067064_F01 | pyramidal SS | 1 |    |
| 385 | 1772063065_F01 | pyramidal SS | 1 |    |
| 420 | 1772063068_E07 | pyramidal SS | 1 |    |
| 269 | 1772063065_F02 | pyramidal SS | 1 |    |
| 478 | 1772063065_D09 | pyramidal SS | 1 |    |
| 549 | 1772067063_C06 | pyramidal SS | 1 |    |
| 487 | 1772063068_G01 | pyramidal SS | 1 |    |
| 428 | 1772062115_C08 | pyramidal SS | 1 |    |
| 439 | 1772063061_A02 | pyramidal SS | 1 |    |
| 492 | 1772071040_H08 | pyramidal SS | 1 |    |
| 407 | 1772067064_H05 | pyramidal SS | 1 |    |
| 388 | 1772063065_A01 | pyramidal SS | 1 |   |
| 310 | 1772063061_A05 | pyramidal SS | 1 |  |
| 247 | 1772063068_F11 | pyramidal SS | 1 |  |
| 380 | 1772063068_C01 | pyramidal SS | 1 |  |
| 311 | 1772063068_F02 | pyramidal SS | 1 |  |
| 238 | 1772063068_B01 | pyramidal SS | 1 |  |
| 406 | 1772071014_C08 | pyramidal SS | 1 |  |
| 72  | 1772071017_D10 | interneurons | 1 |  |
| 489 | 1772063065_H05 | pyramidal SS | 1 |  |
| 529 | 1772063065_A06 | pyramidal SS | 1 |  |
| 563 | 1772066104_A01 | pyramidal SS | 1 |  |
| 450 | 1772063078_F03 | pyramidal SS | 1 |  |
| 249 | 1772067074_B09 | pyramidal SS | 1 |  |
| 516 | 1772060240_F09 | pyramidal SS | 1 |  |
| 340 | 1772063065_A03 | pyramidal SS | 1 |  |
| 49  | 1772071015_G12 | interneurons | 1 |  |
| 524 | 1772060240_A02 | pyramidal SS | 1 |  |
| 398 | 1772063077_E05 | pyramidal SS | 1 |  |
| 45  | 1772067065_E07 | interneurons | 1 |  |
| 47  | 1772067063_E06 | interneurons | 1 |  |
| 561 | 1772066104_G09 | pyramidal SS | 1 |  |
| 459 | 1772062115_E09 | pyramidal SS | 1 |  |
| 463 | 1772067063_H06 | pyramidal SS | 1 |  |

|     |                |              |   |                                                                                       |
|-----|----------------|--------------|---|---------------------------------------------------------------------------------------|
| 403 | 1772063061_A03 | pyramidal SS | 1 |    |
| 469 | 1772067073_D11 | pyramidal SS | 1 |    |
| 408 | 1772063068_A12 | pyramidal SS | 1 |    |
| 531 | 1772063068_E02 | pyramidal SS | 1 |    |
| 87  | 1772071040_A12 | interneurons | 1 |    |
| 432 | 1772063061_B06 | pyramidal SS | 1 |    |
| 453 | 1772062113_D06 | pyramidal SS | 1 |    |
| 321 | 1772063068_G10 | pyramidal SS | 1 |    |
| 184 | 1772062109_B03 | pyramidal SS | 1 |    |
| 449 | 1772063070_F01 | pyramidal SS | 1 |    |
| 372 | 1772062118_B11 | pyramidal SS | 1 |    |
| 384 | 1772063077_C12 | pyramidal SS | 1 |    |
| 281 | 1772062128_D10 | pyramidal SS | 1 |    |
| 401 | 1772063061_A10 | pyramidal SS | 1 |    |
| 387 | 1772062118_A01 | pyramidal SS | 1 |    |
| 272 | 1772063064_B11 | pyramidal SS | 1 |    |
| 402 | 1772062128_C12 | pyramidal SS | 1 |    |
| 85  | 1772062115_G05 | interneurons | 1 |    |
| 54  | 1772071017_B02 | interneurons | 1 |    |
| 525 | 1772060240_C06 | pyramidal SS | 1 |    |
| 411 | 1772067065_G07 | pyramidal SS | 1 |    |
| 462 | 1772062113_G03 | pyramidal SS | 1 |    |
| 461 | 1772062114_G07 | pyramidal SS | 1 |    |
| 485 | 1772063068_E12 | pyramidal SS | 1 |    |
| 444 | 1772063068_B04 | pyramidal SS | 1 |  |
| 289 | 1772062128_D12 | pyramidal SS | 1 |  |
| 235 | 1772063068_A01 | pyramidal SS | 1 |  |
| 452 | 1772063062_D12 | pyramidal SS | 1 |  |
| 358 | 1772062109_E09 | pyramidal SS | 1 |  |
| 511 | 1772063068_A07 | pyramidal SS | 1 |  |
| 89  | 1772063078_F12 | interneurons | 1 |  |
| 418 | 1772063061_E05 | pyramidal SS | 1 |  |
| 494 | 1772063065_A08 | pyramidal SS | 1 |  |
| 138 | 1772063065_C02 | interneurons | 1 |  |
| 426 | 1772063061_G12 | pyramidal SS | 1 |  |
| 433 | 1772063071_E12 | pyramidal SS | 1 |  |
| 451 | 1772062115_D06 | pyramidal SS | 1 |  |
| 533 | 1772063068_C06 | pyramidal SS | 1 |  |
| 160 | 1772063064_B06 | interneurons | 1 |  |
| 94  | 1772062111_G03 | interneurons | 1 |  |
| 267 | 1772063068_A02 | pyramidal SS | 1 |  |
| 341 | 1772062128_A09 | pyramidal SS | 1 |  |
| 491 | 1772062113_A04 | pyramidal SS | 1 |  |
| 498 | 1772063078_E04 | pyramidal SS | 1 |  |
| 282 | 1772063078_B12 | pyramidal SS | 1 |  |
| 304 | 1772063068_E06 | pyramidal SS | 1 |  |
| 502 | 1772063070_D09 | pyramidal SS | 1 |  |
| 473 | 1772063070_D11 | pyramidal SS | 1 |  |
| 464 | 1772062114_A02 | pyramidal SS | 1 |  |
| 156 | 1772058148_H08 | interneurons | 1 |  |



|     |                |              |   |                                                                                     |
|-----|----------------|--------------|---|-------------------------------------------------------------------------------------|
| 264 | 1772063068_D04 | pyramidal SS | 1 |  |
| 497 | 1772062113_B05 | pyramidal SS | 1 |  |
| 532 | 1772063068_C11 | pyramidal SS | 1 |  |
| 338 | 1772063068_C10 | pyramidal SS | 1 |  |
| 242 | 1772063077_D06 | pyramidal SS | 1 |  |
| 505 | 1772063065_B05 | pyramidal SS | 1 |  |
| 232 | 1772063063_H02 | pyramidal SS | 1 |  |
| 285 | 1772063065_D04 | pyramidal SS | 1 |  |
| 241 | 1772063062_H11 | pyramidal SS | 1 |  |
| 82  | 1772063068_G07 | interneurons | 1 |  |
| 470 | 1772063071_D09 | pyramidal SS | 1 |  |
| 382 | 1772060240_B01 | pyramidal SS | 1 |  |
| 560 | 1772066104_H05 | pyramidal SS | 1 |  |
| 424 | 1772063071_A03 | pyramidal SS | 1 |  |
| 320 | 1772063065_E02 | pyramidal SS | 1 |  |
| 206 | 1772067070_F07 | pyramidal SS | 1 |  |
| 394 | 1772063071_E01 | pyramidal SS | 1 |  |
| 466 | 1772062113_E03 | pyramidal SS | 1 |  |
| 105 | 1772062109_H07 | interneurons | 1 |  |
| 472 | 1772062113_D03 | pyramidal SS | 1 |  |
| 195 | 1772071041_G09 | pyramidal SS | 1 |  |
| 286 | 1772062116_B11 | pyramidal SS | 1 |  |

Table 2: Branch 1.1

| node.label | cell.name      | cell.group           | main.topic | topics                                                                                |
|------------|----------------|----------------------|------------|---------------------------------------------------------------------------------------|
| 97         | 1772062128_G04 | interneurons         | 1          |  |
| 229        | 1772067070_G08 | pyramidal SS         | 1          |  |
| 1519       | 1772062118_H11 | astrocytes_ependymal | 1          |  |
| 475        | 1772063063_A07 | pyramidal SS         | 1          |  |
| 409        | 1772062109_H06 | pyramidal SS         | 1          |  |
| 1687       | 1772063071_G10 | endothelial-mural    | 1          |  |
| 412        | 1772062128_D01 | pyramidal SS         | 1          |  |
| 458        | 1772062109_G11 | pyramidal SS         | 1          |  |
| 440        | 1772063061_B01 | pyramidal SS         | 1          |  |
| 465        | 1772062109_D07 | pyramidal SS         | 1          |  |
| 425        | 1772058171_C07 | pyramidal SS         | 1          |  |
| 223        | 1772071040_F05 | pyramidal SS         | 1          |  |
| 414        | 1772063061_H04 | pyramidal SS         | 1          |  |
| 445        | 1772063077_C06 | pyramidal SS         | 1          |  |
| 129        | 1772063063_H03 | interneurons         | 1          |  |
| 435        | 1772058177_H05 | pyramidal SS         | 1          |  |
| 143        | 1772062115_G06 | interneurons         | 1          |  |
| 437        | 1772058177_H07 | pyramidal SS         | 1          |  |
| 350        | 1772063062_D03 | pyramidal SS         | 1          |  |
| 330        | 1772063062_F05 | pyramidal SS         | 1          |  |
| 154        | 1772058177_D04 | interneurons         | 1          |  |
| 507        | 1772063078_E06 | pyramidal SS         | 1          |  |
| 92         | 1772062128_D11 | interneurons         | 1          |  |
| 327        | 1772063071_E07 | pyramidal SS         | 1          |  |

|     |                |              |   |                                                                                       |
|-----|----------------|--------------|---|---------------------------------------------------------------------------------------|
| 438 | 1772058171_E01 | pyramidal SS | 1 |    |
| 280 | 1772062128_D07 | pyramidal SS | 1 |    |
| 287 | 1772063078_A04 | pyramidal SS | 1 |    |
| 484 | 1772062115_E10 | pyramidal SS | 1 |    |
| 240 | 1772063063_G11 | pyramidal SS | 1 |    |
| 109 | 1772063071_A06 | interneurons | 1 |    |
| 333 | 1772058177_G10 | pyramidal SS | 1 |    |
| 194 | 1772062116_B04 | pyramidal SS | 1 |    |
| 130 | 1772071017_A01 | interneurons | 1 |    |
| 118 | 1772071014_A12 | interneurons | 1 |    |
| 481 | 1772063063_H04 | pyramidal SS | 1 |    |
| 443 | 1772063061_G01 | pyramidal SS | 1 |    |
| 145 | 1772071017_G02 | interneurons | 1 |    |
| 342 | 1772063071_F08 | pyramidal SS | 1 |    |
| 548 | 1772067070_D09 | pyramidal SS | 1 |    |
| 495 | 1772063071_B03 | pyramidal SS | 1 |    |
| 329 | 1772063071_C08 | pyramidal SS | 1 |    |
| 496 | 1772063071_E05 | pyramidal SS | 1 |    |
| 262 | 1772063071_H01 | pyramidal SS | 1 |    |
| 234 | 1772063071_G03 | pyramidal SS | 1 |    |
| 95  | 1772063061_H03 | interneurons | 1 |    |
| 256 | 1772062115_G01 | pyramidal SS | 1 |    |
| 79  | 1772063077_B03 | interneurons | 1 |    |
| 467 | 1772067073_H12 | pyramidal SS | 1 |    |
| 454 | 1772063062_D06 | pyramidal SS | 1 |  |
| 140 | 1772062115_H01 | interneurons | 1 |  |
| 100 | 1772062128_B10 | interneurons | 1 |  |
| 378 | 1772063071_C01 | pyramidal SS | 1 |  |
| 309 | 1772062116_A06 | pyramidal SS | 1 |  |
| 182 | 1772063063_E12 | pyramidal SS | 1 |  |
| 236 | 1772063071_E06 | pyramidal SS | 1 |  |
| 168 | 1772067069_A03 | pyramidal SS | 1 |  |
| 233 | 1772063065_C11 | pyramidal SS | 1 |  |
| 354 | 1772071040_D11 | pyramidal SS | 1 |  |
| 369 | 1772067063_A01 | pyramidal SS | 1 |  |
| 457 | 1772063068_C12 | pyramidal SS | 1 |  |
| 364 | 1772071041_F02 | pyramidal SS | 1 |  |
| 250 | 1772063077_D12 | pyramidal SS | 1 |  |
| 400 | 1772062111_A09 | pyramidal SS | 1 |  |
| 299 | 1772071040_B12 | pyramidal SS | 1 |  |
| 277 | 1772062109_E06 | pyramidal SS | 1 |  |
| 288 | 1772063068_D03 | pyramidal SS | 1 |  |
| 446 | 1772063061_H08 | pyramidal SS | 1 |  |
| 337 | 1772062109_A11 | pyramidal SS | 1 |  |
| 476 | 1772062111_C10 | pyramidal SS | 1 |  |
| 503 | 1772063077_B04 | pyramidal SS | 1 |  |
| 448 | 1772063063_E11 | pyramidal SS | 1 |  |
| 217 | 1772071041_E12 | pyramidal SS | 1 |  |
| 360 | 1772067074_C04 | pyramidal SS | 1 |  |
| 323 | 1772067074_D08 | pyramidal SS | 1 |  |

|      |                |                   |   |  |
|------|----------------|-------------------|---|--|
| 357  | 1772067064_G12 | pyramidal SS      | 1 |  |
| 353  | 1772071040_F10 | pyramidal SS      | 1 |  |
| 111  | 1772067066_H09 | interneurons      | 1 |  |
| 556  | 1772071041_A09 | pyramidal SS      | 1 |  |
| 316  | 1772060225_C12 | pyramidal SS      | 1 |  |
| 93   | 1772063078_B02 | interneurons      | 1 |  |
| 239  | 1772063070_F03 | pyramidal SS      | 1 |  |
| 150  | 1772062128_G06 | interneurons      | 1 |  |
| 98   | 1772062109_H03 | interneurons      | 1 |  |
| 1489 | 1772062128_C09 | endothelial-mural | 1 |  |
| 1445 | 1772063068_B12 | endothelial-mural | 1 |  |
| 348  | 1772060224_C03 | pyramidal SS      | 1 |  |
| 90   | 1772062115_C05 | interneurons      | 1 |  |
| 427  | 1772062128_H06 | pyramidal SS      | 1 |  |
| 325  | 1772063062_F07 | pyramidal SS      | 1 |  |
| 306  | 1772060226_F11 | pyramidal SS      | 1 |  |
| 296  | 1772063065_F04 | pyramidal SS      | 1 |  |
| 303  | 1772060224_H02 | pyramidal SS      | 1 |  |
| 1688 | 1772058148_C03 | endothelial-mural | 1 |  |
| 1680 | 1772062111_E09 | endothelial-mural | 1 |  |
| 1444 | 1772063063_H05 | endothelial-mural | 1 |  |
| 1441 | 1772063065_D08 | endothelial-mural | 1 |  |
| 1682 | 1772063074_H03 | endothelial-mural | 1 |  |
| 1683 | 1772063062_H10 | endothelial-mural | 1 |  |
| 1439 | 1772063061_B10 | endothelial-mural | 1 |  |
| 1089 | 1772063068_F06 | oligodendrocytes  | 1 |  |
| 506  | 1772063078_D10 | pyramidal SS      | 1 |  |
| 509  | 1772063070_F09 | pyramidal SS      | 1 |  |
| 1443 | 1772063065_B12 | endothelial-mural | 1 |  |
| 1446 | 1772062109_G06 | endothelial-mural | 1 |  |
| 1675 | 1772063063_G07 | endothelial-mural | 1 |  |
| 1670 | 1772062113_D02 | endothelial-mural | 1 |  |
| 517  | 1772062128_A11 | pyramidal SS      | 1 |  |
| 146  | 1772062111_C11 | interneurons      | 1 |  |
| 307  | 1772067069_C08 | pyramidal SS      | 1 |  |
| 1305 | 1772063063_H11 | microglia         | 1 |  |
| 1327 | 1772060240_H10 | microglia         | 1 |  |
| 1369 | 1772063063_B01 | endothelial-mural | 1 |  |
| 1330 | 1772063063_A03 | microglia         | 1 |  |
| 1689 | 1772063061_D09 | endothelial-mural | 1 |  |
| 1496 | 1772066104_A09 | endothelial-mural | 1 |  |
| 1690 | 1772063068_D01 | endothelial-mural | 1 |  |
| 1390 | 1772062111_D07 | endothelial-mural | 1 |  |
| 1685 | 1772063078_G10 | endothelial-mural | 1 |  |
| 512  | 1772062114_G09 | pyramidal SS      | 1 |  |
| 1486 | 1772060240_B11 | endothelial-mural | 1 |  |
| 1674 | 1772067064_D03 | endothelial-mural | 1 |  |
| 1368 | 1772062113_D11 | endothelial-mural | 1 |  |
| 1660 | 1772062111_B09 | endothelial-mural | 1 |  |
| 1365 | 1772062113_G08 | endothelial-mural | 1 |  |

|      |                |                   |   |                                                                                       |
|------|----------------|-------------------|---|---------------------------------------------------------------------------------------|
| 1463 | 1772062111_A11 | endothelial-mural | 1 |    |
| 1461 | 1772062109_E02 | endothelial-mural | 1 |    |
| 1351 | 1772063061_G03 | endothelial-mural | 1 |    |
| 1437 | 1772063065_D10 | endothelial-mural | 1 |    |
| 1429 | 1772063070_A05 | endothelial-mural | 1 |    |
| 1359 | 1772067070_H08 | endothelial-mural | 1 |    |
| 1462 | 1772060224_F01 | endothelial-mural | 1 |    |
| 1663 | 1772062111_D02 | endothelial-mural | 3 |    |
| 1447 | 1772062116_H04 | endothelial-mural | 3 |    |
| 1658 | 1772063062_D04 | endothelial-mural | 3 |    |
| 1405 | 1772063063_C11 | endothelial-mural | 1 |    |
| 1651 | 1772060240_C12 | endothelial-mural | 3 |    |
| 1676 | 1772067063_E08 | endothelial-mural | 3 |    |
| 1673 | 1772062116_E06 | endothelial-mural | 3 |    |
| 1666 | 1772063077_B05 | endothelial-mural | 3 |    |
| 1454 | 1772062116_H07 | endothelial-mural | 3 |    |
| 1403 | 1772062113_C01 | endothelial-mural | 3 |    |
| 1398 | 1772062114_A09 | endothelial-mural | 3 |    |
| 1147 | 1772063070_D01 | oligodendrocytes  | 3 |    |
| 1408 | 1772063063_G05 | endothelial-mural | 3 |    |
| 1475 | 1772062115_G08 | endothelial-mural | 3 |    |
| 1419 | 1772067074_H09 | endothelial-mural | 3 |    |
| 1497 | 1772060240_G06 | endothelial-mural | 3 |    |
| 1455 | 1772063070_F02 | endothelial-mural | 3 |    |
| 1404 | 1772067073_A12 | endothelial-mural | 3 |    |
| 1358 | 1772060240_A03 | endothelial-mural | 3 |   |
| 1460 | 1772067074_D07 | endothelial-mural | 3 |  |
| 1493 | 1772067063_E01 | endothelial-mural | 3 |  |
| 1389 | 1772062109_D05 | endothelial-mural | 3 |  |
| 1498 | 1772062109_B04 | endothelial-mural | 3 |  |
| 1668 | 1772062113_H10 | endothelial-mural | 3 |  |
| 1664 | 1772063077_A05 | endothelial-mural | 3 |  |
| 1483 | 1772062128_E01 | endothelial-mural | 3 |  |
| 1421 | 1772067073_F07 | endothelial-mural | 3 |  |
| 1406 | 1772062109_B07 | endothelial-mural | 3 |  |
| 1681 | 1772062111_F01 | endothelial-mural | 3 |  |
| 1656 | 1772063062_D11 | endothelial-mural | 3 |  |
| 1436 | 1772063070_G07 | endothelial-mural | 3 |  |
| 1414 | 1772067074_H04 | endothelial-mural | 3 |  |
| 1432 | 1772060240_D07 | endothelial-mural | 3 |  |
| 1412 | 1772067063_A07 | endothelial-mural | 3 |  |
| 1450 | 1772067063_D05 | endothelial-mural | 3 |  |
| 1420 | 1772071041_H04 | endothelial-mural | 3 |  |
| 1427 | 1772067074_F11 | endothelial-mural | 3 |  |
| 1501 | 1772067069_H12 | endothelial-mural | 3 |  |
| 1653 | 1772067069_E08 | endothelial-mural | 3 |  |
| 1361 | 1772063071_A01 | endothelial-mural | 3 |  |
| 1411 | 1772071040_F09 | endothelial-mural | 3 |  |
| 1409 | 1772067069_E07 | endothelial-mural | 3 |  |
| 1400 | 1772063070_B04 | endothelial-mural | 3 |  |

|      |                |                   |   |                                                                                       |
|------|----------------|-------------------|---|---------------------------------------------------------------------------------------|
| 1478 | 1772060225_H04 | endothelial-mural | 3 |    |
| 1363 | 1772067070_C05 | endothelial-mural | 3 |    |
| 1669 | 1772067074_G05 | endothelial-mural | 3 |    |
| 1410 | 1772067063_A11 | endothelial-mural | 3 |    |
| 1433 | 1772067063_B03 | endothelial-mural | 3 |    |
| 1671 | 1772067074_C09 | endothelial-mural | 3 |    |
| 1503 | 1772063071_G02 | endothelial-mural | 3 |    |
| 1350 | 1772063078_H11 | endothelial-mural | 3 |    |
| 1378 | 1772058177_F10 | endothelial-mural | 3 |    |
| 1476 | 1772062114_H08 | endothelial-mural | 3 |    |
| 1381 | 1772058177_F12 | endothelial-mural | 3 |    |
| 1440 | 1772062115_F01 | endothelial-mural | 3 |    |
| 1500 | 1772063071_D02 | endothelial-mural | 3 |    |
| 1417 | 1772063071_D11 | endothelial-mural | 3 |    |
| 1397 | 1772063070_F11 | endothelial-mural | 3 |    |
| 1467 | 1772063071_F12 | endothelial-mural | 3 |    |
| 1492 | 1772063071_B06 | endothelial-mural | 3 |    |
| 1387 | 1772063079_B05 | endothelial-mural | 3 |    |
| 1418 | 1772071040_E11 | endothelial-mural | 3 |    |
| 1352 | 1772063071_D01 | endothelial-mural | 3 |    |
| 1499 | 1772063071_B12 | endothelial-mural | 3 |    |
| 1355 | 1772063062_H12 | endothelial-mural | 3 |    |
| 1360 | 1772063079_C02 | endothelial-mural | 3 |    |
| 1395 | 1772063079_H12 | endothelial-mural | 3 |    |
| 1667 | 1772058171_E08 | endothelial-mural | 3 |    |
| 1456 | 1772060224_C09 | endothelial-mural | 3 |   |
| 1407 | 1772071040_D01 | endothelial-mural | 3 |  |
| 1394 | 1772063079_C11 | endothelial-mural | 3 |  |
| 1453 | 1772063079_A07 | endothelial-mural | 3 |  |
| 1382 | 1772058177_G12 | endothelial-mural | 3 |  |
| 1424 | 1772067074_H08 | endothelial-mural | 3 |  |
| 1269 | 1772060225_E03 | microglia         | 3 |  |
| 1473 | 1772063064_A08 | endothelial-mural | 3 |  |
| 1662 | 1772063061_C07 | endothelial-mural | 3 |  |
| 1452 | 1772058177_F11 | endothelial-mural | 3 |  |
| 1348 | 1772063064_A11 | endothelial-mural | 3 |  |
| 1495 | 1772062111_F09 | endothelial-mural | 3 |  |
| 1354 | 1772062111_E02 | endothelial-mural | 3 |  |
| 1391 | 1772063077_D11 | endothelial-mural | 3 |  |
| 1469 | 1772058177_A08 | endothelial-mural | 3 |  |
| 1647 | 1772063079_E03 | endothelial-mural | 3 |  |
| 1399 | 1772062111_H12 | endothelial-mural | 3 |  |
| 1426 | 1772063070_A07 | endothelial-mural | 3 |  |
| 1659 | 1772058177_G01 | endothelial-mural | 3 |  |
| 1402 | 1772058177_G07 | endothelial-mural | 3 |  |
| 1428 | 1772063064_B04 | endothelial-mural | 3 |  |
| 1649 | 1772063078_E07 | endothelial-mural | 3 |  |
| 1661 | 1772062113_E06 | endothelial-mural | 3 |  |
| 1386 | 1772062128_D06 | endothelial-mural | 3 |  |
| 1373 | 1772058177_G06 | endothelial-mural | 3 |  |

|      |                |                   |   |                                                                                       |
|------|----------------|-------------------|---|---------------------------------------------------------------------------------------|
| 1396 | 1772060224_E05 | endothelial-mural | 3 |    |
| 1431 | 1772063070_E06 | endothelial-mural | 3 |    |
| 1375 | 1772058177_H02 | endothelial-mural | 3 |    |
| 1370 | 1772058171_E12 | endothelial-mural | 3 |    |
| 1449 | 1772058171_G04 | endothelial-mural | 3 |    |
| 1377 | 1772058171_E11 | endothelial-mural | 3 |    |
| 1384 | 1772058171_H05 | endothelial-mural | 3 |    |
| 1380 | 1772058171_G07 | endothelial-mural | 3 |    |
| 1430 | 1772071040_B11 | endothelial-mural | 3 |    |
| 1494 | 1772058171_A01 | endothelial-mural | 3 |    |
| 1416 | 1772067073_B09 | endothelial-mural | 3 |    |
| 1451 | 1772058177_A05 | endothelial-mural | 3 |    |
| 1458 | 1772058171_A12 | endothelial-mural | 3 |    |
| 1379 | 1772058171_G09 | endothelial-mural | 3 |    |
| 1362 | 1772063079_A09 | endothelial-mural | 3 |    |
| 1477 | 1772063071_G12 | endothelial-mural | 3 |    |
| 1459 | 1772067073_H10 | endothelial-mural | 3 |    |
| 1464 | 1772058171_A06 | endothelial-mural | 3 |    |
| 1364 | 1772063079_A11 | endothelial-mural | 3 |    |
| 1347 | 1772063071_E02 | endothelial-mural | 3 |    |
| 1376 | 1772058177_D01 | endothelial-mural | 3 |    |
| 1392 | 1772062113_H07 | endothelial-mural | 3 |    |
| 1471 | 1772058177_B01 | endothelial-mural | 3 |    |
| 1356 | 1772058177_C08 | endothelial-mural | 3 |    |
| 1470 | 1772060224_H01 | endothelial-mural | 3 |  |
| 1371 | 1772063064_F06 | endothelial-mural | 3 |  |
| 1401 | 1772063064_E04 | endothelial-mural | 3 |  |
| 1353 | 1772063064_B05 | endothelial-mural | 3 |  |
| 1479 | 1772058177_H03 | endothelial-mural | 3 |  |
| 1457 | 1772067073_H05 | endothelial-mural | 3 |  |
| 1385 | 1772058171_G05 | endothelial-mural | 3 |  |
| 1650 | 1772058177_B10 | endothelial-mural | 3 |  |
| 1679 | 1772063074_C04 | endothelial-mural | 3 |  |
| 1435 | 1772060224_A05 | endothelial-mural | 3 |  |
| 1425 | 1772058148_F12 | endothelial-mural | 3 |  |
| 1415 | 1772058148_E02 | endothelial-mural | 3 |  |
| 1268 | 1772058177_A07 | microglia         | 3 |  |
| 1288 | 1772058177_E01 | microglia         | 3 |  |
| 1434 | 1772058148_F05 | endothelial-mural | 3 |  |
| 1366 | 1772062128_G09 | endothelial-mural | 3 |  |
| 1393 | 1772062111_G12 | endothelial-mural | 3 |  |
| 1665 | 1772063079_F03 | endothelial-mural | 3 |  |
| 1648 | 1772058177_B08 | endothelial-mural | 3 |  |
| 1677 | 1772058148_G02 | endothelial-mural | 3 |  |
| 1349 | 1772060224_B09 | endothelial-mural | 3 |  |
| 1465 | 1772060224_F04 | endothelial-mural | 3 |  |
| 1442 | 1772058148_F10 | endothelial-mural | 3 |  |
| 1263 | 1772058171_F04 | microglia         | 3 |  |
| 1657 | 1772058148_F01 | endothelial-mural | 3 |  |
| 1491 | 1772058177_H04 | endothelial-mural | 3 |  |

|      |                |                      |   |  |
|------|----------------|----------------------|---|--|
| 1691 | 1772058148_F03 | endothelial-mural    | 3 |  |
| 1487 | 1772063078_A02 | endothelial-mural    | 3 |  |
| 1472 | 1772062111_B12 | endothelial-mural    | 3 |  |
| 1357 | 1772058148_A07 | endothelial-mural    | 3 |  |
| 1438 | 1772060226_E09 | endothelial-mural    | 3 |  |
| 1652 | 1772067073_A03 | endothelial-mural    | 3 |  |
| 1374 | 1772058177_H06 | endothelial-mural    | 3 |  |
| 1331 | 1772060226_H12 | microglia            | 3 |  |
| 1332 | 1772062118_F03 | microglia            | 3 |  |
| 1282 | 1772060226_E03 | microglia            | 3 |  |
| 1321 | 1772062111_F12 | microglia            | 3 |  |
| 1278 | 1772058148_D12 | microglia            | 3 |  |
| 1295 | 1772062111_H06 | microglia            | 3 |  |
| 1423 | 1772058148_E09 | endothelial-mural    | 3 |  |
| 1590 | 1772058148_G05 | astrocytes_ependymal | 3 |  |
| 1334 | 1772062128_H04 | microglia            | 3 |  |
| 1588 | 1772062113_E12 | astrocytes_ependymal | 3 |  |
| 1474 | 1772063064_B02 | endothelial-mural    | 3 |  |
| 1341 | 1772060224_B07 | microglia            | 3 |  |
| 1340 | 1772058177_E03 | microglia            | 3 |  |
| 1466 | 1772060224_H12 | endothelial-mural    | 3 |  |
| 1542 | 1772062128_B12 | astrocytes_ependymal | 3 |  |
| 1284 | 1772058177_A12 | microglia            | 3 |  |
| 1654 | 1772058148_D03 | endothelial-mural    | 3 |  |
| 1655 | 1772058148_D10 | endothelial-mural    | 3 |  |
| 1343 | 1772062118_D09 | microglia            | 3 |  |
| 1309 | 1772062111_A05 | microglia            | 3 |  |
| 1273 | 1772058177_C03 | microglia            | 3 |  |
| 1638 | 1772058148_B12 | astrocytes_ependymal | 3 |  |
| 1275 | 1772062128_F05 | microglia            | 3 |  |
| 1292 | 1772063074_B03 | microglia            | 3 |  |
| 1317 | 1772062111_G06 | microglia            | 3 |  |
| 1383 | 1772058171_F01 | endothelial-mural    | 3 |  |
| 1298 | 1772062115_A07 | microglia            | 3 |  |
| 1289 | 1772058177_B11 | microglia            | 3 |  |
| 1293 | 1772058171_F11 | microglia            | 3 |  |
| 1310 | 1772060224_B12 | microglia            | 3 |  |
| 1314 | 1772063074_F08 | microglia            | 3 |  |
| 1299 | 1772062115_C02 | microglia            | 3 |  |
| 1286 | 1772058171_C05 | microglia            | 3 |  |
| 1344 | 1772062118_F11 | microglia            | 3 |  |
| 1336 | 1772060225_F05 | microglia            | 3 |  |
| 1547 | 1772058171_A08 | astrocytes_ependymal | 3 |  |
| 1481 | 1772060224_D12 | endothelial-mural    | 3 |  |
| 1335 | 1772062118_E06 | microglia            | 3 |  |
| 1306 | 1772062118_A11 | microglia            | 3 |  |
| 1290 | 1772058177_F07 | microglia            | 3 |  |
| 1422 | 1772058148_C04 | endothelial-mural    | 3 |  |
| 1413 | 1772058148_D04 | endothelial-mural    | 3 |  |
| 1315 | 1772058177_F04 | microglia            | 3 |  |

|      |                |                      |   |  |
|------|----------------|----------------------|---|--|
| 1448 | 1772063062_G06 | endothelial-mural    | 3 |  |
| 1280 | 1772066104_B07 | microglia            | 3 |  |
| 1296 | 1772063061_F10 | microglia            | 3 |  |
| 1311 | 1772067064_D12 | microglia            | 3 |  |
| 1319 | 1772062109_A06 | microglia            | 3 |  |
| 1301 | 1772062109_D06 | microglia            | 3 |  |
| 1485 | 1772062128_C11 | endothelial-mural    | 3 |  |
| 1502 | 1772063062_A05 | endothelial-mural    | 3 |  |
| 1318 | 1772062109_D12 | microglia            | 3 |  |
| 1297 | 1772062116_D02 | microglia            | 3 |  |
| 1620 | 1772063062_E03 | astrocytes_ependymal | 3 |  |
| 1482 | 1772063062_B10 | endothelial-mural    | 3 |  |
| 1333 | 1772063062_D07 | microglia            | 3 |  |
| 1614 | 1772058148_E06 | astrocytes_ependymal | 3 |  |
| 1291 | 1772058177_G04 | microglia            | 3 |  |
| 1312 | 1772060240_F05 | microglia            | 3 |  |
| 1324 | 1772067064_B09 | microglia            | 3 |  |
| 1316 | 1772067074_D04 | microglia            | 3 |  |
| 1266 | 1772058148_F06 | microglia            | 3 |  |
| 1287 | 1772062128_A07 | microglia            | 3 |  |
| 1372 | 1772058148_H05 | endothelial-mural    | 3 |  |
| 1329 | 1772063077_D08 | microglia            | 3 |  |
| 1303 | 1772062118_F04 | microglia            | 3 |  |
| 1264 | 1772060226_D02 | microglia            | 3 |  |
| 1271 | 1772058177_D11 | microglia            | 3 |  |
| 1345 | 1772062111_D12 | microglia            | 3 |  |
| 1313 | 1772063077_E03 | microglia            | 3 |  |
| 1285 | 1772062128_C02 | microglia            | 3 |  |
| 1672 | 1772063077_B06 | endothelial-mural    | 3 |  |
| 1323 | 1772063074_H12 | microglia            | 3 |  |
| 1326 | 1772067070_C02 | microglia            | 3 |  |
| 1300 | 1772062109_E12 | microglia            | 3 |  |
| 1328 | 1772062116_G09 | microglia            | 3 |  |
| 1270 | 1772058177_D10 | microglia            | 3 |  |
| 1468 | 1772062111_A08 | endothelial-mural    | 3 |  |
| 1484 | 1772062128_A02 | endothelial-mural    | 3 |  |
| 1639 | 1772063063_C12 | astrocytes_ependymal | 3 |  |
| 1342 | 1772060226_H02 | microglia            | 1 |  |
| 1490 | 1772062116_C03 | endothelial-mural    | 3 |  |
| 1488 | 1772058148_B03 | endothelial-mural    | 3 |  |
| 1294 | 1772062113_A11 | microglia            | 1 |  |
| 1367 | 1772060240_D11 | endothelial-mural    | 1 |  |
| 1267 | 1772058177_A09 | microglia            | 1 |  |
| 1320 | 1772062113_E05 | microglia            | 1 |  |
| 1388 | 1772062109_H08 | endothelial-mural    | 3 |  |
| 1272 | 1772062109_D01 | microglia            | 1 |  |
| 1265 | 1772062109_F11 | microglia            | 1 |  |
| 421  | 1772063061_C11 | pyramidal SS         | 1 |  |
| 1325 | 1772060224_H07 | microglia            | 1 |  |
| 1337 | 1772060226_F12 | microglia            | 1 |  |



|      |                |                      |   |  |
|------|----------------|----------------------|---|--|
| 1276 | 1772067070_C04 | microglia            | 1 |  |
| 1304 | 1772063078_G02 | microglia            | 1 |  |
| 1480 | 1772063064_F09 | endothelial-mural    | 1 |  |
| 1307 | 1772060224_F07 | microglia            | 1 |  |
| 1641 | 1772063065_A11 | astrocytes_ependymal | 1 |  |
| 1553 | 1772063062_D09 | astrocytes_ependymal | 1 |  |
| 1598 | 1772063077_B01 | astrocytes_ependymal | 1 |  |
| 1283 | 1772060240_H11 | microglia            | 3 |  |
| 1339 | 1772062109_C05 | microglia            | 3 |  |
| 1308 | 1772063077_F06 | microglia            | 4 |  |
| 1613 | 1772058148_G03 | astrocytes_ependymal | 3 |  |
| 1346 | 1772062128_B03 | microglia            | 3 |  |
| 1624 | 1772060225_C06 | astrocytes_ependymal | 3 |  |
| 1602 | 1772063063_F12 | astrocytes_ependymal | 4 |  |
| 1279 | 1772058148_A05 | microglia            | 3 |  |
| 1580 | 1772063063_F04 | astrocytes_ependymal | 4 |  |
| 1631 | 1772058148_B11 | astrocytes_ependymal | 4 |  |
| 1551 | 1772063071_H09 | astrocytes_ependymal | 4 |  |
| 1534 | 1772062114_B05 | astrocytes_ependymal | 4 |  |
| 1540 | 1772063062_B05 | astrocytes_ependymal | 4 |  |
| 1509 | 1772071015_H09 | astrocytes_ependymal | 4 |  |
| 1515 | 1772071015_A08 | astrocytes_ependymal | 4 |  |
| 1569 | 1772062114_D04 | astrocytes_ependymal | 4 |  |
| 1549 | 1772062128_E04 | astrocytes_ependymal | 4 |  |
| 1530 | 1772062109_F07 | astrocytes_ependymal | 4 |  |
| 1554 | 1772063068_D06 | astrocytes_ependymal | 4 |  |
| 1533 | 1772062114_D03 | astrocytes_ependymal | 4 |  |
| 1543 | 1772062114_E01 | astrocytes_ependymal | 4 |  |
| 1581 | 1772063074_D02 | astrocytes_ependymal | 4 |  |
| 1593 | 1772062128_C04 | astrocytes_ependymal | 4 |  |
| 1524 | 1772071014_D07 | astrocytes_ependymal | 4 |  |
| 1579 | 1772063061_C12 | astrocytes_ependymal | 4 |  |
| 1618 | 1772062118_C05 | astrocytes_ependymal | 4 |  |
| 1607 | 1772063063_G08 | astrocytes_ependymal | 4 |  |
| 1586 | 1772062114_F06 | astrocytes_ependymal | 4 |  |
| 1592 | 1772058148_C05 | astrocytes_ependymal | 4 |  |
| 1512 | 1772071014_D06 | astrocytes_ependymal | 4 |  |
| 1565 | 1772062115_F11 | astrocytes_ependymal | 4 |  |
| 1513 | 1772071014_F02 | astrocytes_ependymal | 4 |  |
| 1505 | 1772062109_D11 | astrocytes_ependymal | 4 |  |
| 1572 | 1772060240_B02 | astrocytes_ependymal | 4 |  |
| 1528 | 1772063077_F03 | astrocytes_ependymal | 4 |  |
| 1560 | 1772062128_F01 | astrocytes_ependymal | 4 |  |
| 1511 | 1772071014_H07 | astrocytes_ependymal | 4 |  |
| 1566 | 1772060240_F07 | astrocytes_ependymal | 4 |  |
| 1609 | 1772062116_B01 | astrocytes_ependymal | 1 |  |
| 1635 | 1772060240_H06 | astrocytes_ependymal | 1 |  |
| 1510 | 1772071014_G04 | astrocytes_ependymal | 4 |  |
| 1583 | 1772060240_H12 | astrocytes_ependymal | 4 |  |
| 1621 | 1772067074_F02 | astrocytes_ependymal | 1 |  |

|      |                |                      |   |                                                                                       |
|------|----------------|----------------------|---|---------------------------------------------------------------------------------------|
| 1619 | 1772063061_D08 | astrocytes_ependymal | 4 |    |
| 1617 | 1772062111_A04 | astrocytes_ependymal | 4 |    |
| 1582 | 1772062109_E11 | astrocytes_ependymal | 1 |    |
| 1603 | 1772067073_H07 | astrocytes_ependymal | 4 |    |
| 1599 | 1772063077_E12 | astrocytes_ependymal | 4 |    |
| 1576 | 1772060240_B05 | astrocytes_ependymal | 4 |    |
| 1539 | 1772071015_G05 | astrocytes_ependymal | 1 |    |
| 1625 | 1772062109_G12 | astrocytes_ependymal | 4 |    |
| 1567 | 1772062113_F04 | astrocytes_ependymal | 1 |    |
| 1571 | 1772063077_F11 | astrocytes_ependymal | 4 |    |
| 1575 | 1772060240_D05 | astrocytes_ependymal | 4 |    |
| 1573 | 1772058148_C01 | astrocytes_ependymal | 4 |    |
| 1507 | 1772071014_C07 | astrocytes_ependymal | 4 |    |
| 1504 | 1772071014_H04 | astrocytes_ependymal | 4 |    |
| 1605 | 1772067073_E04 | astrocytes_ependymal | 4 |    |
| 1610 | 1772067063_A06 | astrocytes_ependymal | 4 |    |
| 1589 | 1772067063_G08 | astrocytes_ependymal | 4 |    |
| 1591 | 1772063064_E06 | astrocytes_ependymal | 4 |    |
| 1595 | 1772060224_E12 | astrocytes_ependymal | 4 |    |
| 1626 | 1772063078_G04 | astrocytes_ependymal | 4 |    |
| 1537 | 1772063064_D08 | astrocytes_ependymal | 4 |    |
| 1632 | 1772062128_E08 | astrocytes_ependymal | 4 |    |
| 1508 | 1772067063_E05 | astrocytes_ependymal | 4 |    |
| 1587 | 1772063062_C11 | astrocytes_ependymal | 4 |    |
| 1606 | 1772067064_C11 | astrocytes_ependymal | 4 |    |
| 1585 | 1772071041_B08 | astrocytes_ependymal | 4 |   |
| 1604 | 1772067066_C06 | astrocytes_ependymal | 4 |  |
| 1596 | 1772058148_E08 | astrocytes_ependymal | 4 |  |
| 1520 | 1772067069_C11 | astrocytes_ependymal | 4 |  |
| 1525 | 1772071014_A02 | astrocytes_ependymal | 4 |  |
| 1597 | 1772058177_C04 | astrocytes_ependymal | 4 |  |
| 1521 | 1772071014_E01 | astrocytes_ependymal | 4 |  |
| 1608 | 1772067063_E07 | astrocytes_ependymal | 4 |  |
| 1564 | 1772062109_A08 | astrocytes_ependymal | 4 |  |
| 1563 | 1772062128_C08 | astrocytes_ependymal | 2 |  |
| 1642 | 1772058148_D11 | astrocytes_ependymal | 2 |  |
| 1643 | 1772058148_C07 | astrocytes_ependymal | 2 |  |
| 1644 | 1772058148_B02 | astrocytes_ependymal | 4 |  |
| 1615 | 1772062128_G01 | astrocytes_ependymal | 4 |  |
| 1561 | 1772062118_A08 | astrocytes_ependymal | 4 |  |
| 1611 | 1772071040_B09 | astrocytes_ependymal | 4 |  |
| 1518 | 1772071015_H10 | astrocytes_ependymal | 4 |  |
| 1555 | 1772063065_E10 | astrocytes_ependymal | 4 |  |
| 1516 | 1772071015_D10 | astrocytes_ependymal | 4 |  |
| 1517 | 1772067064_A10 | astrocytes_ependymal | 4 |  |
| 1526 | 1772063071_H08 | astrocytes_ependymal | 4 |  |
| 1522 | 1772071015_D02 | astrocytes_ependymal | 4 |  |
| 1514 | 1772058171_H01 | astrocytes_ependymal | 4 |  |
| 1531 | 1772058177_D07 | astrocytes_ependymal | 2 |  |
| 1600 | 1772058148_C09 | astrocytes_ependymal | 4 |  |

|      |                |                      |   |  |
|------|----------------|----------------------|---|--|
| 1535 | 1772058177_B03 | astrocytes_ependymal | 4 |  |
| 1552 | 1772062118_G01 | astrocytes_ependymal | 4 |  |
| 1577 | 1772060224_D09 | astrocytes_ependymal | 2 |  |
| 1544 | 1772063068_F04 | astrocytes_ependymal | 4 |  |
| 1574 | 1772060224_G08 | astrocytes_ependymal | 4 |  |
| 1558 | 1772063071_H02 | astrocytes_ependymal | 4 |  |
| 1536 | 1772058171_B03 | astrocytes_ependymal | 4 |  |
| 1556 | 1772062115_D08 | astrocytes_ependymal | 4 |  |
| 1538 | 1772071015_A12 | astrocytes_ependymal | 4 |  |
| 1550 | 1772063071_H07 | astrocytes_ependymal | 4 |  |
| 1601 | 1772063074_C07 | astrocytes_ependymal | 4 |  |
| 1548 | 1772063071_B11 | astrocytes_ependymal | 4 |  |
| 1532 | 1772058171_F07 | astrocytes_ependymal | 4 |  |
| 1584 | 1772062118_G03 | astrocytes_ependymal | 4 |  |
| 1578 | 1772062109_E04 | astrocytes_ependymal | 4 |  |
| 1277 | 1772058148_E12 | microglia            | 4 |  |
| 1541 | 1772063061_F08 | astrocytes_ependymal | 4 |  |
| 1678 | 1772063074_F11 | endothelial-mural    | 3 |  |
| 1684 | 1772058148_D02 | endothelial-mural    | 3 |  |
| 1523 | 1772062128_D05 | astrocytes_ependymal | 4 |  |
| 1570 | 1772063077_G09 | astrocytes_ependymal | 4 |  |
| 1557 | 1772060226_B09 | astrocytes_ependymal | 4 |  |
| 1527 | 1772062128_E02 | astrocytes_ependymal | 3 |  |
| 1622 | 1772060226_C10 | astrocytes_ependymal | 4 |  |
| 1545 | 1772063065_D11 | astrocytes_ependymal | 4 |  |
| 1338 | 1772062115_H11 | microglia            | 3 |  |
| 1529 | 1772058177_E09 | astrocytes_ependymal | 3 |  |
| 1640 | 1772060226_E06 | astrocytes_ependymal | 3 |  |
| 1274 | 1772062109_E05 | microglia            | 4 |  |

Table 3: Branch 1.2

| node.label | cell.name      | cell.group           | main.topic | topics |
|------------|----------------|----------------------|------------|--------|
| 486        | 1772060225_E04 | pyramidal SS         | 1          |        |
| 383        | 1772060225_E01 | pyramidal SS         | 1          |        |
| 78         | 1772062128_G08 | interneurons         | 1          |        |
| 508        | 1772063078_G09 | pyramidal SS         | 1          |        |
| 273        | 1772062128_E10 | pyramidal SS         | 1          |        |
| 80         | 1772062114_H03 | interneurons         | 1          |        |
| 121        | 1772063077_H05 | interneurons         | 1          |        |
| 326        | 1772062113_E01 | pyramidal SS         | 1          |        |
| 147        | 1772058148_H03 | interneurons         | 1          |        |
| 101        | 1772063061_B03 | interneurons         | 1          |        |
| 103        | 1772058177_G09 | interneurons         | 1          |        |
| 515        | 1772062128_F12 | pyramidal SS         | 1          |        |
| 116        | 1772062128_F10 | interneurons         | 1          |        |
| 434        | 1772058177_C10 | pyramidal SS         | 1          |        |
| 110        | 1772058148_F09 | interneurons         | 1          |        |
| 91         | 1772063064_G03 | interneurons         | 1          |        |
| 1645       | 1772058148_A12 | astrocytes_ependymal | 1          |        |

|      |                |                      |   |  |
|------|----------------|----------------------|---|--|
| 1616 | 1772058148_F08 | astrocytes_ependymal | 1 |  |
| 393  | 1772063077_G04 | pyramidal SS         | 1 |  |
| 501  | 1772063068_C05 | pyramidal SS         | 1 |  |
| 391  | 1772063068_B10 | pyramidal SS         | 1 |  |
| 371  | 1772071041_E04 | pyramidal SS         | 1 |  |
| 523  | 1772063068_E03 | pyramidal SS         | 1 |  |
| 1627 | 1772062128_E07 | astrocytes_ependymal | 1 |  |
| 1546 | 1772063064_H03 | astrocytes_ependymal | 1 |  |
| 534  | 1772063077_A07 | pyramidal SS         | 1 |  |
| 429  | 1772063061_C02 | pyramidal SS         | 1 |  |
| 447  | 1772062128_E06 | pyramidal SS         | 1 |  |
| 558  | 1772062116_F11 | pyramidal SS         | 1 |  |
| 521  | 1772063068_D02 | pyramidal SS         | 1 |  |
| 246  | 1772067066_B03 | pyramidal SS         | 1 |  |
| 410  | 1772062109_D03 | pyramidal SS         | 1 |  |
| 222  | 1772071041_D04 | pyramidal SS         | 1 |  |
| 455  | 1772062114_F10 | pyramidal SS         | 1 |  |
| 331  | 1772063068_A06 | pyramidal SS         | 1 |  |
| 291  | 1772062116_G05 | pyramidal SS         | 1 |  |
| 84   | 1772062113_F08 | interneurons         | 1 |  |
| 317  | 1772063068_G11 | pyramidal SS         | 1 |  |
| 351  | 1772067064_A11 | pyramidal SS         | 1 |  |
| 268  | 1772063063_E04 | pyramidal SS         | 1 |  |
| 88   | 1772063078_F01 | interneurons         | 1 |  |
| 423  | 1772063061_E06 | pyramidal SS         | 1 |  |
| 1076 | 1772060224_C08 | oligodendrocytes     | 1 |  |
| 479  | 1772062111_E07 | pyramidal SS         | 1 |  |
| 1262 | 1772063061_B04 | oligodendrocytes     | 1 |  |
| 81   | 1772062114_E02 | interneurons         | 1 |  |
| 514  | 1772063078_C10 | pyramidal SS         | 1 |  |
| 1116 | 1772062111_C03 | oligodendrocytes     | 1 |  |
| 368  | 1772062111_H10 | pyramidal SS         | 1 |  |
| 895  | 1772063061_D12 | oligodendrocytes     | 1 |  |
| 415  | 1772062115_C09 | pyramidal SS         | 1 |  |
| 618  | 1772063063_F10 | oligodendrocytes     | 1 |  |
| 929  | 1772063078_F02 | oligodendrocytes     | 1 |  |
| 396  | 1772062111_H11 | pyramidal SS         | 1 |  |
| 1506 | 1772062111_B03 | astrocytes_ependymal | 1 |  |
| 102  | 1772063061_B05 | interneurons         | 1 |  |
| 468  | 1772062111_H03 | pyramidal SS         | 1 |  |
| 1081 | 1772063078_B08 | oligodendrocytes     | 1 |  |
| 701  | 1772058148_B08 | oligodendrocytes     | 1 |  |
| 513  | 1772060224_C05 | pyramidal SS         | 1 |  |
| 969  | 1772063077_C01 | oligodendrocytes     | 1 |  |
| 430  | 1772063061_C06 | pyramidal SS         | 1 |  |
| 1054 | 1772060225_H10 | oligodendrocytes     | 1 |  |
| 417  | 1772063061_H12 | pyramidal SS         | 1 |  |
| 174  | 1772071040_B04 | pyramidal SS         | 1 |  |
| 185  | 1772067064_C09 | pyramidal SS         | 1 |  |
| 370  | 1772071040_A11 | pyramidal SS         | 1 |  |

|      |                |                  |   |                                                                                       |
|------|----------------|------------------|---|---------------------------------------------------------------------------------------|
| 422  | 1772063061_D11 | pyramidal SS     | 1 |    |
| 196  | 1772067069_B02 | pyramidal SS     | 1 |    |
| 254  | 1772071041_A02 | pyramidal SS     | 1 |    |
| 954  | 1772063061_F11 | oligodendrocytes | 1 |    |
| 218  | 1772071041_F09 | pyramidal SS     | 1 |    |
| 605  | 1772067069_H05 | oligodendrocytes | 1 |    |
| 684  | 1772071041_D10 | oligodendrocytes | 1 |    |
| 483  | 1772071040_G12 | pyramidal SS     | 1 |    |
| 261  | 1772067073_C04 | pyramidal SS     | 1 |    |
| 436  | 1772063061_F06 | pyramidal SS     | 1 |    |
| 865  | 1772063062_D05 | oligodendrocytes | 1 |    |
| 379  | 1772062111_B01 | pyramidal SS     | 1 |    |
| 1061 | 1772062115_F05 | oligodendrocytes | 1 |    |
| 760  | 1772062113_F02 | oligodendrocytes | 1 |    |
| 1160 | 1772062109_D04 | oligodendrocytes | 1 |    |
| 419  | 1772058177_G03 | pyramidal SS     | 1 |    |
| 994  | 1772060225_H12 | oligodendrocytes | 1 |    |
| 1107 | 1772063062_F09 | oligodendrocytes | 1 |    |
| 83   | 1772062115_A12 | interneurons     | 1 |    |
| 791  | 1772062113_C03 | oligodendrocytes | 1 |    |
| 919  | 1772062115_C04 | oligodendrocytes | 1 |    |
| 792  | 1772062116_B12 | oligodendrocytes | 1 |    |
| 710  | 1772063062_B03 | oligodendrocytes | 1 |    |
| 711  | 1772071040_A06 | oligodendrocytes | 1 |    |
| 1194 | 1772063061_E12 | oligodendrocytes | 1 |  |
| 676  | 1772071040_C12 | oligodendrocytes | 1 |  |
| 931  | 1772062115_A02 | oligodendrocytes | 1 |  |
| 1145 | 1772062115_G11 | oligodendrocytes | 1 |  |
| 652  | 1772063077_B07 | oligodendrocytes | 1 |  |
| 603  | 1772058171_H07 | oligodendrocytes | 1 |  |
| 925  | 1772063078_C09 | oligodendrocytes | 1 |  |
| 99   | 1772063063_F01 | interneurons     | 1 |  |
| 930  | 1772063078_B11 | oligodendrocytes | 1 |  |
| 613  | 1772063061_A11 | oligodendrocytes | 1 |  |
| 878  | 1772063063_C10 | oligodendrocytes | 1 |  |
| 564  | 1772067064_G07 | oligodendrocytes | 1 |  |
| 963  | 1772060225_F09 | oligodendrocytes | 1 |  |
| 833  | 1772063063_A01 | oligodendrocytes | 1 |  |
| 611  | 1772063063_F03 | oligodendrocytes | 1 |  |
| 815  | 1772063063_D06 | oligodendrocytes | 1 |  |
| 86   | 1772063064_G08 | interneurons     | 1 |  |
| 1080 | 1772063078_D05 | oligodendrocytes | 1 |  |
| 896  | 1772063078_B01 | oligodendrocytes | 1 |  |
| 824  | 1772062113_F03 | oligodendrocytes | 1 |  |
| 843  | 1772060240_C04 | oligodendrocytes | 1 |  |
| 1097 | 1772062111_G04 | oligodendrocytes | 1 |  |
| 1039 | 1772062111_B05 | oligodendrocytes | 1 |  |
| 1092 | 1772062109_C11 | oligodendrocytes | 1 |  |
| 610  | 1772060240_C09 | oligodendrocytes | 1 |  |
| 1196 | 1772062113_H11 | oligodendrocytes | 1 |  |

|      |                |                      |   |  |
|------|----------------|----------------------|---|--|
| 1114 | 1772062111_E08 | oligodendrocytes     | 1 |  |
| 980  | 1772060224_H11 | oligodendrocytes     | 1 |  |
| 937  | 1772060225_G06 | oligodendrocytes     | 1 |  |
| 728  | 1772063063_H07 | oligodendrocytes     | 2 |  |
| 690  | 1772063070_G01 | oligodendrocytes     | 1 |  |
| 820  | 1772058148_A04 | oligodendrocytes     | 2 |  |
| 888  | 1772071041_A10 | oligodendrocytes     | 1 |  |
| 956  | 1772063078_G08 | oligodendrocytes     | 1 |  |
| 1067 | 1772060224_F03 | oligodendrocytes     | 1 |  |
| 1009 | 1772060226_G06 | oligodendrocytes     | 2 |  |
| 1109 | 1772060226_H10 | oligodendrocytes     | 1 |  |
| 803  | 1772062113_B03 | oligodendrocytes     | 2 |  |
| 1087 | 1772063068_B05 | oligodendrocytes     | 2 |  |
| 1106 | 1772063065_A02 | oligodendrocytes     | 2 |  |
| 821  | 1772062113_A12 | oligodendrocytes     | 2 |  |
| 1088 | 1772063077_D10 | oligodendrocytes     | 2 |  |
| 1091 | 1772063065_B03 | oligodendrocytes     | 2 |  |
| 1042 | 1772062111_C02 | oligodendrocytes     | 2 |  |
| 898  | 1772062115_A04 | oligodendrocytes     | 2 |  |
| 1167 | 1772062115_B11 | oligodendrocytes     | 2 |  |
| 1074 | 1772063068_E05 | oligodendrocytes     | 2 |  |
| 672  | 1772063070_H07 | oligodendrocytes     | 2 |  |
| 1038 | 1772063068_F10 | oligodendrocytes     | 2 |  |
| 1120 | 1772063063_E02 | oligodendrocytes     | 2 |  |
| 782  | 1772063061_A07 | oligodendrocytes     | 2 |  |
| 641  | 1772063077_C03 | oligodendrocytes     | 2 |  |
| 982  | 1772063064_D09 | oligodendrocytes     | 2 |  |
| 1066 | 1772063068_A09 | oligodendrocytes     | 2 |  |
| 730  | 1772062111_B02 | oligodendrocytes     | 2 |  |
| 1193 | 1772062113_G06 | oligodendrocytes     | 2 |  |
| 1133 | 1772062128_G02 | oligodendrocytes     | 2 |  |
| 906  | 1772063078_C07 | oligodendrocytes     | 2 |  |
| 1043 | 1772060225_B06 | oligodendrocytes     | 2 |  |
| 1099 | 1772067070_C09 | oligodendrocytes     | 2 |  |
| 827  | 1772063062_G01 | oligodendrocytes     | 2 |  |
| 1098 | 1772063064_G09 | oligodendrocytes     | 2 |  |
| 920  | 1772062111_B04 | oligodendrocytes     | 2 |  |
| 712  | 1772058148_F02 | oligodendrocytes     | 2 |  |
| 1629 | 1772063078_G06 | astrocytes_ependymal | 2 |  |
| 1118 | 1772062118_C07 | oligodendrocytes     | 2 |  |
| 1002 | 1772060226_D03 | oligodendrocytes     | 2 |  |
| 1084 | 1772063062_D10 | oligodendrocytes     | 2 |  |
| 948  | 1772063061_C03 | oligodendrocytes     | 2 |  |
| 1131 | 1772062128_E09 | oligodendrocytes     | 2 |  |
| 1028 | 1772060226_B02 | oligodendrocytes     | 2 |  |
| 645  | 1772062116_H06 | oligodendrocytes     | 2 |  |
| 802  | 1772062116_E07 | oligodendrocytes     | 2 |  |
| 1073 | 1772063062_F08 | oligodendrocytes     | 2 |  |
| 1058 | 1772062109_F08 | oligodendrocytes     | 2 |  |
| 1056 | 1772060224_A01 | oligodendrocytes     | 2 |  |

|      |                |                  |   |  |
|------|----------------|------------------|---|--|
| 1195 | 1772062113_E02 | oligodendrocytes | 2 |  |
| 858  | 1772063074_G07 | oligodendrocytes | 2 |  |
| 1108 | 1772063062_F01 | oligodendrocytes | 2 |  |
| 988  | 1772063063_H08 | oligodendrocytes | 2 |  |
| 1144 | 1772067064_A09 | oligodendrocytes | 2 |  |
| 1093 | 1772063078_D09 | oligodendrocytes | 2 |  |
| 905  | 1772063068_G06 | oligodendrocytes | 2 |  |
| 1095 | 1772063062_D08 | oligodendrocytes | 2 |  |
| 829  | 1772063062_C01 | oligodendrocytes | 2 |  |
| 575  | 1772062111_F07 | oligodendrocytes | 2 |  |
| 576  | 1772067070_A05 | oligodendrocytes | 2 |  |
| 1192 | 1772063070_D05 | oligodendrocytes | 2 |  |
| 1094 | 1772063065_H08 | oligodendrocytes | 2 |  |
| 655  | 1772062113_D01 | oligodendrocytes | 2 |  |
| 766  | 1772062114_F03 | oligodendrocytes | 2 |  |
| 921  | 1772060225_C07 | oligodendrocytes | 2 |  |
| 1077 | 1772063061_D05 | oligodendrocytes | 2 |  |
| 816  | 1772062116_D04 | oligodendrocytes | 2 |  |
| 867  | 1772060240_F02 | oligodendrocytes | 2 |  |
| 1173 | 1772062113_C02 | oligodendrocytes | 2 |  |
| 819  | 1772062113_A02 | oligodendrocytes | 2 |  |
| 866  | 1772063061_D01 | oligodendrocytes | 2 |  |
| 609  | 1772067069_F06 | oligodendrocytes | 2 |  |
| 565  | 1772067070_D08 | oligodendrocytes | 2 |  |
| 614  | 1772063063_C02 | oligodendrocytes | 2 |  |
| 1117 | 1772062111_D09 | oligodendrocytes | 2 |  |
| 911  | 1772063077_E09 | oligodendrocytes | 2 |  |
| 1016 | 1772060226_G05 | oligodendrocytes | 2 |  |
| 570  | 1772063063_C07 | oligodendrocytes | 2 |  |
| 989  | 1772060225_G07 | oligodendrocytes | 2 |  |
| 1035 | 1772060226_B12 | oligodendrocytes | 2 |  |
| 1179 | 1772062111_B07 | oligodendrocytes | 2 |  |
| 908  | 1772062113_A08 | oligodendrocytes | 2 |  |
| 607  | 1772067069_B03 | oligodendrocytes | 2 |  |
| 854  | 1772060240_F04 | oligodendrocytes | 2 |  |
| 619  | 1772060225_E07 | oligodendrocytes | 2 |  |
| 699  | 1772063070_C06 | oligodendrocytes | 2 |  |
| 608  | 1772067074_E07 | oligodendrocytes | 2 |  |
| 761  | 1772062113_B01 | oligodendrocytes | 2 |  |
| 1070 | 1772060225_D09 | oligodendrocytes | 2 |  |
| 637  | 1772062109_A03 | oligodendrocytes | 2 |  |
| 774  | 1772062113_D09 | oligodendrocytes | 2 |  |
| 1171 | 1772062113_D12 | oligodendrocytes | 2 |  |
| 668  | 1772071041_G10 | oligodendrocytes | 2 |  |
| 1165 | 1772062118_G11 | oligodendrocytes | 2 |  |
| 901  | 1772060225_C05 | oligodendrocytes | 2 |  |
| 801  | 1772062116_E08 | oligodendrocytes | 2 |  |
| 951  | 1772062114_B12 | oligodendrocytes | 2 |  |
| 936  | 1772062116_E01 | oligodendrocytes | 2 |  |
| 965  | 1772063079_A12 | oligodendrocytes | 2 |  |

|      |                |                  |   |  |
|------|----------------|------------------|---|--|
| 973  | 1772062114_H04 | oligodendrocytes | 2 |  |
| 1143 | 1772062128_D09 | oligodendrocytes | 2 |  |
| 926  | 1772060240_F10 | oligodendrocytes | 2 |  |
| 785  | 1772058171_D10 | oligodendrocytes | 2 |  |
| 938  | 1772060240_A12 | oligodendrocytes | 2 |  |
| 1178 | 1772062109_H02 | oligodendrocytes | 2 |  |
| 571  | 1772062114_G10 | oligodendrocytes | 2 |  |
| 950  | 1772062115_A06 | oligodendrocytes | 2 |  |
| 606  | 1772063063_E07 | oligodendrocytes | 2 |  |
| 656  | 1772062109_E08 | oligodendrocytes | 2 |  |
| 975  | 1772063064_E03 | oligodendrocytes | 2 |  |
| 1159 | 1772062109_B05 | oligodendrocytes | 2 |  |
| 1079 | 1772063077_A12 | oligodendrocytes | 2 |  |
| 811  | 1772062109_A12 | oligodendrocytes | 2 |  |
| 859  | 1772063063_G02 | oligodendrocytes | 2 |  |
| 1129 | 1772058148_E07 | oligodendrocytes | 2 |  |
| 773  | 1772062113_B04 | oligodendrocytes | 2 |  |
| 579  | 1772060226_F05 | oligodendrocytes | 2 |  |
| 877  | 1772063078_H04 | oligodendrocytes | 2 |  |
| 1157 | 1772062111_C04 | oligodendrocytes | 2 |  |
| 823  | 1772063063_B06 | oligodendrocytes | 2 |  |
| 588  | 1772062115_C01 | oligodendrocytes | 2 |  |
| 893  | 1772062118_B03 | oligodendrocytes | 2 |  |
| 1082 | 1772063071_A05 | oligodendrocytes | 2 |  |
| 884  | 1772063063_B11 | oligodendrocytes | 2 |  |
| 581  | 1772062109_A05 | oligodendrocytes | 2 |  |
| 847  | 1772063062_B04 | oligodendrocytes | 2 |  |
| 781  | 1772062109_A07 | oligodendrocytes | 2 |  |
| 879  | 1772062113_G09 | oligodendrocytes | 2 |  |
| 913  | 1772063074_G04 | oligodendrocytes | 2 |  |
| 648  | 1772062114_B01 | oligodendrocytes | 2 |  |
| 612  | 1772063063_B04 | oligodendrocytes | 2 |  |
| 834  | 1772063063_A12 | oligodendrocytes | 2 |  |
| 585  | 1772063063_F08 | oligodendrocytes | 2 |  |
| 654  | 1772062113_B09 | oligodendrocytes | 2 |  |
| 740  | 1772060240_F06 | oligodendrocytes | 2 |  |
| 752  | 1772060240_B12 | oligodendrocytes | 2 |  |
| 825  | 1772062109_C03 | oligodendrocytes | 2 |  |
| 1075 | 1772062114_C06 | oligodendrocytes | 2 |  |
| 686  | 1772067069_D04 | oligodendrocytes | 2 |  |
| 1057 | 1772060225_C02 | oligodendrocytes | 2 |  |
| 1021 | 1772062114_A06 | oligodendrocytes | 2 |  |
| 714  | 1772067074_D12 | oligodendrocytes | 2 |  |
| 732  | 1772063063_D08 | oligodendrocytes | 2 |  |
| 734  | 1772063063_G10 | oligodendrocytes | 2 |  |
| 863  | 1772062111_E04 | oligodendrocytes | 2 |  |
| 891  | 1772071041_B04 | oligodendrocytes | 2 |  |
| 615  | 1772060240_F11 | oligodendrocytes | 2 |  |
| 627  | 1772060225_H11 | oligodendrocytes | 2 |  |
| 1053 | 1772063077_F04 | oligodendrocytes | 2 |  |



|      |                |                      |   |                                                                                       |
|------|----------------|----------------------|---|---------------------------------------------------------------------------------------|
| 837  | 1772067069_G04 | oligodendrocytes     | 2 |    |
| 736  | 1772062118_C04 | oligodendrocytes     | 2 |    |
| 681  | 1772067064_H01 | oligodendrocytes     | 2 |    |
| 738  | 1772062109_H04 | oligodendrocytes     | 2 |    |
| 674  | 1772067066_B04 | oligodendrocytes     | 2 |    |
| 598  | 1772063061_A09 | oligodendrocytes     | 2 |    |
| 904  | 1772062118_F10 | oligodendrocytes     | 2 |    |
| 907  | 1772063078_B07 | oligodendrocytes     | 2 |    |
| 694  | 1772067064_D10 | oligodendrocytes     | 2 |    |
| 636  | 1772062111_C08 | oligodendrocytes     | 2 |    |
| 1047 | 1772060225_A07 | oligodendrocytes     | 2 |    |
| 835  | 1772071014_D12 | oligodendrocytes     | 2 |    |
| 703  | 1772067073_C02 | oligodendrocytes     | 2 |    |
| 693  | 1772067066_E12 | oligodendrocytes     | 2 |    |
| 943  | 1772063061_C05 | oligodendrocytes     | 2 |    |
| 731  | 1772067074_F04 | oligodendrocytes     | 2 |    |
| 735  | 1772071040_D04 | oligodendrocytes     | 2 |    |
| 1187 | 1772063061_F12 | oligodendrocytes     | 2 |    |
| 1180 | 1772062111_B10 | oligodendrocytes     | 2 |    |
| 876  | 1772062128_A01 | oligodendrocytes     | 2 |    |
| 729  | 1772067074_A11 | oligodendrocytes     | 2 |    |
| 1174 | 1772062114_A01 | oligodendrocytes     | 2 |    |
| 754  | 1772062114_H12 | oligodendrocytes     | 2 |    |
| 836  | 1772062109_A09 | oligodendrocytes     | 2 |    |
| 1245 | 1772063064_F07 | oligodendrocytes     | 2 |    |
| 616  | 1772063063_F05 | oligodendrocytes     | 2 |   |
| 942  | 1772062114_D06 | oligodendrocytes     | 2 |  |
| 723  | 1772062111_B11 | oligodendrocytes     | 2 |  |
| 1184 | 1772063070_C10 | oligodendrocytes     | 2 |  |
| 1185 | 1772062111_A07 | oligodendrocytes     | 2 |  |
| 638  | 1772062111_C01 | oligodendrocytes     | 2 |  |
| 1559 | 1772063077_A11 | astrocytes_ependymal | 2 |  |
| 922  | 1772062114_B09 | oligodendrocytes     | 2 |  |
| 1208 | 1772063064_E07 | oligodendrocytes     | 2 |  |
| 644  | 1772062128_B11 | oligodendrocytes     | 2 |  |
| 1113 | 1772067074_A01 | oligodendrocytes     | 2 |  |
| 1568 | 1772062118_A10 | astrocytes_ependymal | 2 |  |
| 1025 | 1772062115_E11 | oligodendrocytes     | 2 |  |
| 1137 | 1772062128_F09 | oligodendrocytes     | 2 |  |
| 983  | 1772062116_F10 | oligodendrocytes     | 2 |  |
| 624  | 1772060226_F10 | oligodendrocytes     | 2 |  |
| 678  | 1772058148_G09 | oligodendrocytes     | 2 |  |
| 883  | 1772063062_E01 | oligodendrocytes     | 2 |  |
| 1065 | 1772062113_E10 | oligodendrocytes     | 2 |  |
| 849  | 1772063077_D02 | oligodendrocytes     | 2 |  |
| 620  | 1772060225_D10 | oligodendrocytes     | 2 |  |
| 717  | 1772067064_B06 | oligodendrocytes     | 2 |  |
| 992  | 1772063064_H11 | oligodendrocytes     | 2 |  |
| 1063 | 1772062115_B03 | oligodendrocytes     | 2 |  |
| 874  | 1772062118_C01 | oligodendrocytes     | 2 |  |

|      |                |                  |   |                                                                                       |
|------|----------------|------------------|---|---------------------------------------------------------------------------------------|
| 1060 | 1772060225_D08 | oligodendrocytes | 2 |    |
| 848  | 1772062114_E05 | oligodendrocytes | 2 |    |
| 623  | 1772060226_G12 | oligodendrocytes | 2 |    |
| 746  | 1772063061_B12 | oligodendrocytes | 2 |    |
| 1128 | 1772058148_G01 | oligodendrocytes | 2 |    |
| 726  | 1772060240_H04 | oligodendrocytes | 2 |    |
| 953  | 1772063061_B11 | oligodendrocytes | 2 |    |
| 1040 | 1772062111_C06 | oligodendrocytes | 2 |    |
| 583  | 1772060240_A10 | oligodendrocytes | 2 |    |
| 934  | 1772063078_F11 | oligodendrocytes | 2 |    |
| 1049 | 1772062118_G06 | oligodendrocytes | 2 |    |
| 1146 | 1772063063_A11 | oligodendrocytes | 2 |    |
| 765  | 1772062113_F07 | oligodendrocytes | 2 |    |
| 1045 | 1772058148_B06 | oligodendrocytes | 2 |    |
| 642  | 1772062116_A12 | oligodendrocytes | 2 |    |
| 993  | 1772062114_D10 | oligodendrocytes | 2 |    |
| 660  | 1772062116_F01 | oligodendrocytes | 2 |    |
| 807  | 1772058148_A06 | oligodendrocytes | 2 |    |
| 1048 | 1772063074_A12 | oligodendrocytes | 2 |    |
| 981  | 1772063074_H10 | oligodendrocytes | 2 |    |
| 597  | 1772058177_E11 | oligodendrocytes | 2 |    |
| 961  | 1772060224_A02 | oligodendrocytes | 2 |    |
| 928  | 1772063078_C08 | oligodendrocytes | 2 |    |
| 685  | 1772058148_F07 | oligodendrocytes | 2 |    |
| 621  | 1772060225_B07 | oligodendrocytes | 2 |  |
| 817  | 1772063064_D06 | oligodendrocytes | 2 |  |
| 574  | 1772067063_D03 | oligodendrocytes | 2 |  |
| 1020 | 1772060226_B10 | oligodendrocytes | 2 |  |
| 702  | 1772058148_D07 | oligodendrocytes | 2 |  |
| 1096 | 1772063074_E01 | oligodendrocytes | 2 |  |
| 1183 | 1772062113_C11 | oligodendrocytes | 2 |  |
| 688  | 1772058148_G08 | oligodendrocytes | 2 |  |
| 861  | 1772063061_D10 | oligodendrocytes | 2 |  |
| 1068 | 1772062128_G11 | oligodendrocytes | 2 |  |
| 957  | 1772063074_A09 | oligodendrocytes | 2 |  |
| 639  | 1772062111_E06 | oligodendrocytes | 2 |  |
| 894  | 1772063061_G11 | oligodendrocytes | 2 |  |
| 705  | 1772062116_C06 | oligodendrocytes | 2 |  |
| 640  | 1772062109_H10 | oligodendrocytes | 2 |  |
| 1201 | 1772063061_D02 | oligodendrocytes | 2 |  |
| 716  | 1772067074_E11 | oligodendrocytes | 2 |  |
| 790  | 1772062111_D05 | oligodendrocytes | 2 |  |
| 663  | 1772062118_G05 | oligodendrocytes | 2 |  |
| 762  | 1772062111_C09 | oligodendrocytes | 2 |  |
| 753  | 1772062113_B06 | oligodendrocytes | 2 |  |
| 572  | 1772063061_G05 | oligodendrocytes | 2 |  |
| 1124 | 1772063063_C08 | oligodendrocytes | 2 |  |
| 667  | 1772071040_D02 | oligodendrocytes | 2 |  |
| 691  | 1772067070_H09 | oligodendrocytes | 2 |  |
| 1202 | 1772063078_F04 | oligodendrocytes | 2 |  |

|      |                |                  |   |                                                                                       |
|------|----------------|------------------|---|---------------------------------------------------------------------------------------|
| 1036 | 1772060225_E12 | oligodendrocytes | 2 |    |
| 748  | 1772062116_C11 | oligodendrocytes | 2 |    |
| 721  | 1772071040_H06 | oligodendrocytes | 2 |    |
| 1052 | 1772062128_C05 | oligodendrocytes | 2 |    |
| 1037 | 1772062115_E07 | oligodendrocytes | 2 |    |
| 999  | 1772060225_D07 | oligodendrocytes | 2 |    |
| 741  | 1772071040_C11 | oligodendrocytes | 2 |    |
| 1041 | 1772063065_H06 | oligodendrocytes | 2 |    |
| 873  | 1772063062_E11 | oligodendrocytes | 2 |    |
| 1182 | 1772062113_C06 | oligodendrocytes | 2 |    |
| 886  | 1772060225_E02 | oligodendrocytes | 2 |    |
| 682  | 1772067073_D10 | oligodendrocytes | 2 |    |
| 1071 | 1772062113_C09 | oligodendrocytes | 2 |    |
| 653  | 1772062114_B10 | oligodendrocytes | 2 |    |
| 850  | 1772060240_G11 | oligodendrocytes | 2 |    |
| 695  | 1772067063_B07 | oligodendrocytes | 2 |    |
| 689  | 1772067064_B10 | oligodendrocytes | 2 |    |
| 697  | 1772067074_F05 | oligodendrocytes | 2 |    |
| 733  | 1772071040_G11 | oligodendrocytes | 2 |    |
| 742  | 1772067064_C10 | oligodendrocytes | 2 |    |
| 719  | 1772067069_A09 | oligodendrocytes | 2 |    |
| 725  | 1772067069_A02 | oligodendrocytes | 2 |    |
| 1207 | 1772062115_C07 | oligodendrocytes | 2 |    |
| 1168 | 1772062115_G12 | oligodendrocytes | 2 |    |
| 1155 | 1772062115_E03 | oligodendrocytes | 2 |  |
| 1051 | 1772062115_C10 | oligodendrocytes | 2 |  |
| 626  | 1772063079_C10 | oligodendrocytes | 2 |  |
| 1216 | 1772058171_A02 | oligodendrocytes | 2 |  |
| 955  | 1772062114_A08 | oligodendrocytes | 2 |  |
| 763  | 1772062111_G02 | oligodendrocytes | 2 |  |
| 949  | 1772062114_H10 | oligodendrocytes | 2 |  |
| 968  | 1772067073_A08 | oligodendrocytes | 2 |  |
| 709  | 1772067073_E11 | oligodendrocytes | 2 |  |
| 1229 | 1772058171_D01 | oligodendrocytes | 2 |  |
| 1059 | 1772062115_G04 | oligodendrocytes | 2 |  |
| 715  | 1772062116_F05 | oligodendrocytes | 2 |  |
| 1258 | 1772058171_C04 | oligodendrocytes | 2 |  |
| 1190 | 1772062115_E04 | oligodendrocytes | 2 |  |
| 814  | 1772058171_F06 | oligodendrocytes | 2 |  |
| 959  | 1772063079_A06 | oligodendrocytes | 2 |  |
| 910  | 1772060225_C11 | oligodendrocytes | 2 |  |
| 772  | 1772058171_G08 | oligodendrocytes | 2 |  |
| 1203 | 1772062113_F12 | oligodendrocytes | 2 |  |
| 780  | 1772058171_C03 | oligodendrocytes | 2 |  |
| 784  | 1772058171_C12 | oligodendrocytes | 2 |  |
| 768  | 1772058171_F05 | oligodendrocytes | 2 |  |
| 903  | 1772063078_B06 | oligodendrocytes | 2 |  |
| 812  | 1772062115_B06 | oligodendrocytes | 2 |  |
| 1062 | 1772060224_B08 | oligodendrocytes | 2 |  |
| 875  | 1772071040_A08 | oligodendrocytes | 2 |  |

|      |                |                  |   |                                                                                       |
|------|----------------|------------------|---|---------------------------------------------------------------------------------------|
| 677  | 1772071040_C10 | oligodendrocytes | 2 |    |
| 1121 | 1772058171_E06 | oligodendrocytes | 2 |    |
| 909  | 1772062115_C06 | oligodendrocytes | 2 |    |
| 664  | 1772071041_E05 | oligodendrocytes | 2 |    |
| 670  | 1772071041_F05 | oligodendrocytes | 2 |    |
| 880  | 1772062115_E01 | oligodendrocytes | 2 |    |
| 698  | 1772071040_C04 | oligodendrocytes | 2 |    |
| 635  | 1772062113_G05 | oligodendrocytes | 2 |    |
| 897  | 1772062113_B11 | oligodendrocytes | 2 |    |
| 844  | 1772067074_F06 | oligodendrocytes | 2 |    |
| 778  | 1772062114_A03 | oligodendrocytes | 2 |    |
| 1223 | 1772063074_D10 | oligodendrocytes | 2 |    |
| 669  | 1772067066_C04 | oligodendrocytes | 2 |    |
| 739  | 1772071040_G05 | oligodendrocytes | 2 |    |
| 915  | 1772060225_G04 | oligodendrocytes | 2 |    |
| 679  | 1772067066_H05 | oligodendrocytes | 2 |    |
| 680  | 1772067064_G04 | oligodendrocytes | 2 |    |
| 1198 | 1772062113_D04 | oligodendrocytes | 2 |    |
| 666  | 1772067065_G08 | oligodendrocytes | 2 |    |
| 868  | 1772062114_F05 | oligodendrocytes | 2 |    |
| 1175 | 1772062118_D05 | oligodendrocytes | 2 |    |
| 750  | 1772060225_D12 | oligodendrocytes | 2 |    |
| 683  | 1772067073_F06 | oligodendrocytes | 2 |    |
| 813  | 1772071040_D12 | oligodendrocytes | 2 |    |
| 970  | 1772060225_A12 | oligodendrocytes | 2 |  |
| 846  | 1772071041_A08 | oligodendrocytes | 2 |  |
| 789  | 1772062128_H11 | oligodendrocytes | 2 |  |
| 1050 | 1772062114_F08 | oligodendrocytes | 2 |  |
| 589  | 1772060225_A11 | oligodendrocytes | 2 |  |
| 1132 | 1772067070_C12 | oligodendrocytes | 2 |  |
| 722  | 1772071040_H10 | oligodendrocytes | 2 |  |
| 869  | 1772071041_A12 | oligodendrocytes | 2 |  |
| 862  | 1772062114_E06 | oligodendrocytes | 2 |  |
| 964  | 1772063074_G10 | oligodendrocytes | 2 |  |
| 1177 | 1772062115_B08 | oligodendrocytes | 2 |  |
| 718  | 1772067073_D01 | oligodendrocytes | 2 |  |
| 1163 | 1772062118_C10 | oligodendrocytes | 2 |  |
| 743  | 1772063070_G06 | oligodendrocytes | 2 |  |
| 1003 | 1772060226_D04 | oligodendrocytes | 2 |  |
| 584  | 1772062115_D07 | oligodendrocytes | 2 |  |
| 1005 | 1772060226_B11 | oligodendrocytes | 2 |  |
| 651  | 1772062118_E08 | oligodendrocytes | 2 |  |
| 1176 | 1772062118_G02 | oligodendrocytes | 2 |  |
| 590  | 1772063078_B09 | oligodendrocytes | 2 |  |
| 996  | 1772060226_A11 | oligodendrocytes | 2 |  |
| 917  | 1772060224_B03 | oligodendrocytes | 2 |  |
| 902  | 1772062115_D04 | oligodendrocytes | 2 |  |
| 995  | 1772060226_A01 | oligodendrocytes | 2 |  |
| 818  | 1772063074_G12 | oligodendrocytes | 2 |  |
| 1162 | 1772063074_A01 | oligodendrocytes | 2 |  |

|      |                |                  |   |                                                                                       |
|------|----------------|------------------|---|---------------------------------------------------------------------------------------|
| 871  | 1772063062_G05 | oligodendrocytes | 2 |    |
| 857  | 1772071040_D05 | oligodendrocytes | 2 |    |
| 977  | 1772060224_E09 | oligodendrocytes | 2 |    |
| 783  | 1772062111_G01 | oligodendrocytes | 2 |    |
| 708  | 1772062118_D02 | oligodendrocytes | 2 |    |
| 853  | 1772060224_H04 | oligodendrocytes | 2 |    |
| 914  | 1772062115_B10 | oligodendrocytes | 2 |    |
| 851  | 1772063074_C12 | oligodendrocytes | 2 |    |
| 1055 | 1772063074_H05 | oligodendrocytes | 2 |    |
| 839  | 1772063074_A11 | oligodendrocytes | 2 |    |
| 1104 | 1772063068_H06 | oligodendrocytes | 2 |    |
| 881  | 1772063074_F10 | oligodendrocytes | 2 |    |
| 749  | 1772063061_F04 | oligodendrocytes | 2 |    |
| 594  | 1772060225_A05 | oligodendrocytes | 2 |    |
| 658  | 1772062113_G12 | oligodendrocytes | 2 |    |
| 755  | 1772063062_A06 | oligodendrocytes | 2 |    |
| 578  | 1772062114_A12 | oligodendrocytes | 2 |    |
| 1015 | 1772060226_B03 | oligodendrocytes | 2 |    |
| 1072 | 1772062128_B04 | oligodendrocytes | 2 |    |
| 657  | 1772062113_D08 | oligodendrocytes | 2 |    |
| 661  | 1772062115_C03 | oligodendrocytes | 2 |    |
| 617  | 1772060225_F06 | oligodendrocytes | 2 |    |
| 1069 | 1772060225_C04 | oligodendrocytes | 2 |    |
| 604  | 1772067073_B03 | oligodendrocytes | 2 |    |
| 602  | 1772058177_E10 | oligodendrocytes | 2 |    |
| 633  | 1772062111_F06 | oligodendrocytes | 2 |   |
| 1110 | 1772062118_H05 | oligodendrocytes | 2 |  |
| 1210 | 1772062113_E07 | oligodendrocytes | 2 |  |
| 631  | 1772062128_F06 | oligodendrocytes | 2 |  |
| 805  | 1772062114_E11 | oligodendrocytes | 2 |  |
| 900  | 1772063078_E11 | oligodendrocytes | 2 |  |
| 1123 | 1772066104_C11 | oligodendrocytes | 2 |  |
| 1215 | 1772058177_C01 | oligodendrocytes | 2 |  |
| 1230 | 1772058177_F08 | oligodendrocytes | 2 |  |
| 990  | 1772060226_D12 | oligodendrocytes | 2 |  |
| 1158 | 1772062115_H05 | oligodendrocytes | 2 |  |
| 1212 | 1772058177_E07 | oligodendrocytes | 2 |  |
| 1222 | 1772058171_A04 | oligodendrocytes | 2 |  |
| 1214 | 1772058171_E07 | oligodendrocytes | 2 |  |
| 1228 | 1772058171_D04 | oligodendrocytes | 2 |  |
| 771  | 1772060224_C04 | oligodendrocytes | 2 |  |
| 759  | 1772062113_G01 | oligodendrocytes | 2 |  |
| 757  | 1772063079_C12 | oligodendrocytes | 2 |  |
| 600  | 1772058171_F09 | oligodendrocytes | 2 |  |
| 601  | 1772058171_B01 | oligodendrocytes | 2 |  |
| 840  | 1772063062_G11 | oligodendrocytes | 2 |  |
| 767  | 1772062111_D11 | oligodendrocytes | 2 |  |
| 997  | 1772060226_D01 | oligodendrocytes | 2 |  |
| 1001 | 1772060226_A07 | oligodendrocytes | 2 |  |
| 650  | 1772063074_C02 | oligodendrocytes | 2 |  |

|      |                |                  |   |                                                                                       |
|------|----------------|------------------|---|---------------------------------------------------------------------------------------|
| 1032 | 1772060226_D06 | oligodendrocytes | 2 |    |
| 625  | 1772062109_B08 | oligodendrocytes | 2 |    |
| 1004 | 1772060226_E10 | oligodendrocytes | 2 |    |
| 595  | 1772062115_F08 | oligodendrocytes | 2 |    |
| 587  | 1772060224_B04 | oligodendrocytes | 2 |    |
| 967  | 1772063074_F12 | oligodendrocytes | 2 |    |
| 828  | 1772062116_E02 | oligodendrocytes | 2 |    |
| 751  | 1772058177_C06 | oligodendrocytes | 2 |    |
| 872  | 1772063062_E08 | oligodendrocytes | 2 |    |
| 580  | 1772062115_A09 | oligodendrocytes | 2 |    |
| 860  | 1772063061_G08 | oligodendrocytes | 2 |    |
| 1024 | 1772060226_B07 | oligodendrocytes | 2 |    |
| 1254 | 1772058177_B09 | oligodendrocytes | 2 |    |
| 1170 | 1772063062_H01 | oligodendrocytes | 2 |    |
| 889  | 1772062118_A03 | oligodendrocytes | 2 |    |
| 707  | 1772062116_G03 | oligodendrocytes | 2 |    |
| 1008 | 1772060226_H11 | oligodendrocytes | 2 |    |
| 1148 | 1772058148_B01 | oligodendrocytes | 2 |    |
| 985  | 1772060224_B05 | oligodendrocytes | 2 |    |
| 1010 | 1772060226_H04 | oligodendrocytes | 2 |    |
| 659  | 1772062115_H08 | oligodendrocytes | 2 |    |
| 764  | 1772060224_A07 | oligodendrocytes | 2 |    |
| 1150 | 1772067063_G11 | oligodendrocytes | 2 |    |
| 1151 | 1772062128_F08 | oligodendrocytes | 2 |    |
| 569  | 1772058177_D09 | oligodendrocytes | 2 |  |
| 1085 | 1772063065_D03 | oligodendrocytes | 2 |  |
| 1225 | 1772058177_E06 | oligodendrocytes | 2 |  |
| 1189 | 1772062118_E01 | oligodendrocytes | 2 |  |
| 870  | 1772062116_H05 | oligodendrocytes | 2 |  |
| 1014 | 1772060226_C07 | oligodendrocytes | 2 |  |
| 1029 | 1772060226_E05 | oligodendrocytes | 2 |  |
| 706  | 1772062116_A02 | oligodendrocytes | 2 |  |
| 795  | 1772062118_F08 | oligodendrocytes | 2 |  |
| 798  | 1772063062_C10 | oligodendrocytes | 2 |  |
| 1206 | 1772058171_B09 | oligodendrocytes | 2 |  |
| 986  | 1772060224_D01 | oligodendrocytes | 2 |  |
| 1102 | 1772062115_A10 | oligodendrocytes | 2 |  |
| 1139 | 1772062118_A05 | oligodendrocytes | 2 |  |
| 1243 | 1772058171_B07 | oligodendrocytes | 2 |  |
| 744  | 1772062128_H02 | oligodendrocytes | 2 |  |
| 1211 | 1772058171_B04 | oligodendrocytes | 2 |  |
| 890  | 1772063079_F04 | oligodendrocytes | 2 |  |
| 1219 | 1772058171_D03 | oligodendrocytes | 2 |  |
| 1248 | 1772058177_E12 | oligodendrocytes | 2 |  |
| 1241 | 1772058177_B06 | oligodendrocytes | 2 |  |
| 1261 | 1772062128_C10 | oligodendrocytes | 2 |  |
| 1186 | 1772062111_H04 | oligodendrocytes | 2 |  |
| 1218 | 1772062111_E05 | oligodendrocytes | 2 |  |
| 1122 | 1772062128_H08 | oligodendrocytes | 2 |  |
| 628  | 1772062111_F10 | oligodendrocytes | 2 |  |

|      |                |                  |   |  |
|------|----------------|------------------|---|--|
| 960  | 1772063077_D09 | oligodendrocytes | 2 |  |
| 593  | 1772063078_A11 | oligodendrocytes | 2 |  |
| 1000 | 1772060226_F06 | oligodendrocytes | 2 |  |
| 573  | 1772058171_C02 | oligodendrocytes | 2 |  |
| 947  | 1772062114_H05 | oligodendrocytes | 2 |  |
| 622  | 1772063063_E10 | oligodendrocytes | 2 |  |
| 864  | 1772060224_H05 | oligodendrocytes | 2 |  |
| 916  | 1772060224_A11 | oligodendrocytes | 2 |  |
| 1205 | 1772062116_H02 | oligodendrocytes | 2 |  |
| 1161 | 1772060224_D10 | oligodendrocytes | 2 |  |
| 885  | 1772063062_A08 | oligodendrocytes | 2 |  |
| 1250 | 1772058177_B04 | oligodendrocytes | 2 |  |
| 1237 | 1772058177_F06 | oligodendrocytes | 2 |  |
| 1224 | 1772058171_G01 | oligodendrocytes | 2 |  |
| 599  | 1772058177_A06 | oligodendrocytes | 2 |  |
| 1217 | 1772058171_B05 | oligodendrocytes | 2 |  |
| 1247 | 1772058171_B06 | oligodendrocytes | 2 |  |
| 1234 | 1772058171_G11 | oligodendrocytes | 2 |  |
| 856  | 1772062115_D05 | oligodendrocytes | 2 |  |
| 1249 | 1772058171_D02 | oligodendrocytes | 2 |  |
| 1235 | 1772058171_A09 | oligodendrocytes | 2 |  |
| 1246 | 1772058171_E10 | oligodendrocytes | 2 |  |
| 1252 | 1772058171_D08 | oligodendrocytes | 2 |  |
| 788  | 1772058171_H02 | oligodendrocytes | 2 |  |
| 1209 | 1772063079_D11 | oligodendrocytes | 2 |  |
| 1260 | 1772058171_C10 | oligodendrocytes | 2 |  |
| 1253 | 1772058171_E05 | oligodendrocytes | 2 |  |
| 1257 | 1772058171_G10 | oligodendrocytes | 2 |  |
| 1251 | 1772062128_F04 | oligodendrocytes | 2 |  |
| 971  | 1772063079_F09 | oligodendrocytes | 2 |  |
| 1259 | 1772058171_C08 | oligodendrocytes | 2 |  |
| 1086 | 1772063079_G07 | oligodendrocytes | 2 |  |
| 962  | 1772062118_B05 | oligodendrocytes | 2 |  |
| 1119 | 1772063079_H01 | oligodendrocytes | 2 |  |
| 1232 | 1772058171_F03 | oligodendrocytes | 2 |  |
| 831  | 1772063079_D07 | oligodendrocytes | 2 |  |
| 1239 | 1772058171_G03 | oligodendrocytes | 2 |  |
| 720  | 1772071041_D06 | oligodendrocytes | 2 |  |
| 830  | 1772063074_H11 | oligodendrocytes | 2 |  |
| 974  | 1772062115_D03 | oligodendrocytes | 2 |  |
| 799  | 1772058171_C09 | oligodendrocytes | 2 |  |
| 696  | 1772062118_D03 | oligodendrocytes | 2 |  |
| 978  | 1772063079_H03 | oligodendrocytes | 2 |  |
| 1101 | 1772062109_B11 | oligodendrocytes | 2 |  |
| 1153 | 1772063074_B06 | oligodendrocytes | 2 |  |
| 1111 | 1772062118_B06 | oligodendrocytes | 2 |  |
| 1012 | 1772060226_F04 | oligodendrocytes | 2 |  |
| 713  | 1772058148_A10 | oligodendrocytes | 2 |  |
| 1006 | 1772060226_A08 | oligodendrocytes | 2 |  |
| 1166 | 1772062111_C05 | oligodendrocytes | 2 |  |

|      |                |                      |   |  |
|------|----------------|----------------------|---|--|
| 756  | 1772062109_G05 | oligodendrocytes     | 2 |  |
| 1083 | 1772063078_A09 | oligodendrocytes     | 2 |  |
| 838  | 1772062111_E11 | oligodendrocytes     | 2 |  |
| 665  | 1772063061_H11 | oligodendrocytes     | 2 |  |
| 1136 | 1772062128_E12 | oligodendrocytes     | 2 |  |
| 800  | 1772063062_C07 | oligodendrocytes     | 2 |  |
| 1244 | 1772058177_G05 | oligodendrocytes     | 2 |  |
| 1033 | 1772060226_A10 | oligodendrocytes     | 2 |  |
| 1233 | 1772058171_A11 | oligodendrocytes     | 2 |  |
| 1125 | 1772062118_H03 | oligodendrocytes     | 2 |  |
| 727  | 1772062116_B06 | oligodendrocytes     | 2 |  |
| 1017 | 1772060226_A12 | oligodendrocytes     | 2 |  |
| 1026 | 1772060226_G10 | oligodendrocytes     | 2 |  |
| 1064 | 1772063074_C03 | oligodendrocytes     | 2 |  |
| 940  | 1772060224_A06 | oligodendrocytes     | 2 |  |
| 1220 | 1772058177_A03 | oligodendrocytes     | 2 |  |
| 945  | 1772063061_E08 | oligodendrocytes     | 2 |  |
| 1126 | 1772063074_E07 | oligodendrocytes     | 2 |  |
| 1226 | 1772058177_C02 | oligodendrocytes     | 2 |  |
| 804  | 1772062116_A09 | oligodendrocytes     | 2 |  |
| 1636 | 1772063078_G03 | astrocytes_ependymal | 2 |  |
| 692  | 1772058148_G11 | oligodendrocytes     | 2 |  |
| 1027 | 1772060226_A06 | oligodendrocytes     | 2 |  |
| 1149 | 1772058148_A11 | oligodendrocytes     | 2 |  |
| 826  | 1772062116_F04 | oligodendrocytes     | 2 |  |
| 952  | 1772063079_E08 | oligodendrocytes     | 2 |  |
| 806  | 1772062128_H05 | oligodendrocytes     | 2 |  |
| 1240 | 1772058177_A01 | oligodendrocytes     | 2 |  |
| 1169 | 1772062118_F01 | oligodendrocytes     | 2 |  |
| 646  | 1772062113_D10 | oligodendrocytes     | 2 |  |
| 976  | 1772063079_D08 | oligodendrocytes     | 2 |  |
| 855  | 1772063062_F12 | oligodendrocytes     | 2 |  |
| 912  | 1772063074_A04 | oligodendrocytes     | 2 |  |
| 662  | 1772062115_G07 | oligodendrocytes     | 2 |  |
| 1112 | 1772062116_F08 | oligodendrocytes     | 2 |  |
| 704  | 1772067073_G10 | oligodendrocytes     | 2 |  |
| 1238 | 1772058171_B08 | oligodendrocytes     | 2 |  |
| 918  | 1772060224_C10 | oligodendrocytes     | 2 |  |
| 1172 | 1772062111_E12 | oligodendrocytes     | 2 |  |
| 832  | 1772071040_G04 | oligodendrocytes     | 2 |  |
| 632  | 1772062111_F11 | oligodendrocytes     | 2 |  |
| 966  | 1772063079_D01 | oligodendrocytes     | 2 |  |
| 724  | 1772067064_C08 | oligodendrocytes     | 2 |  |
| 1255 | 1772058177_C12 | oligodendrocytes     | 2 |  |
| 1044 | 1772062128_E11 | oligodendrocytes     | 2 |  |
| 1221 | 1772058171_E02 | oligodendrocytes     | 2 |  |
| 673  | 1772071041_F06 | oligodendrocytes     | 2 |  |
| 1018 | 1772063065_F12 | oligodendrocytes     | 2 |  |
| 779  | 1772058177_A02 | oligodendrocytes     | 2 |  |
| 629  | 1772062111_F05 | oligodendrocytes     | 2 |  |



|      |                |                      |   |                                                                                       |
|------|----------------|----------------------|---|---------------------------------------------------------------------------------------|
| 1231 | 1772058171_C01 | oligodendrocytes     | 2 |    |
| 939  | 1772063079_C01 | oligodendrocytes     | 2 |    |
| 797  | 1772058171_D06 | oligodendrocytes     | 2 |    |
| 892  | 1772062116_A11 | oligodendrocytes     | 2 |    |
| 887  | 1772063061_F05 | oligodendrocytes     | 2 |    |
| 1227 | 1772058177_B05 | oligodendrocytes     | 2 |    |
| 1115 | 1772063078_D12 | oligodendrocytes     | 2 |    |
| 1256 | 1772058177_D05 | oligodendrocytes     | 2 |    |
| 769  | 1772062111_E03 | oligodendrocytes     | 2 |    |
| 1164 | 1772063062_E06 | oligodendrocytes     | 2 |    |
| 808  | 1772062111_G11 | oligodendrocytes     | 2 |    |
| 899  | 1772060225_G01 | oligodendrocytes     | 2 |    |
| 1188 | 1772063079_H02 | oligodendrocytes     | 2 |    |
| 1236 | 1772058171_F08 | oligodendrocytes     | 2 |    |
| 972  | 1772063078_A03 | oligodendrocytes     | 2 |    |
| 941  | 1772063061_H10 | oligodendrocytes     | 2 |    |
| 1135 | 1772058177_F03 | oligodendrocytes     | 2 |    |
| 1204 | 1772063079_C04 | oligodendrocytes     | 3 |    |
| 1141 | 1772062128_C01 | oligodendrocytes     | 2 |    |
| 1100 | 1772060225_D06 | oligodendrocytes     | 2 |    |
| 1242 | 1772058148_G12 | oligodendrocytes     | 2 |    |
| 630  | 1772058177_D02 | oligodendrocytes     | 2 |    |
| 1034 | 1772060226_E11 | oligodendrocytes     | 2 |    |
| 1138 | 1772058177_D08 | oligodendrocytes     | 2 |    |
| 1156 | 1772062118_H12 | oligodendrocytes     | 2 |  |
| 1046 | 1772063079_E02 | oligodendrocytes     | 2 |  |
| 1105 | 1772062111_A10 | oligodendrocytes     | 2 |  |
| 1007 | 1772060226_G04 | oligodendrocytes     | 2 |  |
| 1281 | 1772062111_G10 | microglia            | 3 |  |
| 932  | 1772060224_D03 | oligodendrocytes     | 2 |  |
| 1181 | 1772062109_F06 | oligodendrocytes     | 2 |  |
| 810  | 1772060224_G06 | oligodendrocytes     | 2 |  |
| 747  | 1772058148_C02 | oligodendrocytes     | 2 |  |
| 1213 | 1772058177_D12 | oligodendrocytes     | 2 |  |
| 987  | 1772063079_D09 | oligodendrocytes     | 2 |  |
| 1322 | 1772062118_H01 | microglia            | 2 |  |
| 1562 | 1772062114_B04 | astrocytes_ependymal | 2 |  |
| 1011 | 1772060226_G11 | oligodendrocytes     | 2 |  |
| 777  | 1772062113_G11 | oligodendrocytes     | 2 |  |
| 745  | 1772062128_D03 | oligodendrocytes     | 2 |  |
| 758  | 1772062116_G06 | oligodendrocytes     | 2 |  |
| 566  | 1772058177_D03 | oligodendrocytes     | 2 |  |
| 1019 | 1772060226_B04 | oligodendrocytes     | 2 |  |
| 591  | 1772063062_E07 | oligodendrocytes     | 2 |  |
| 991  | 1772063062_D01 | oligodendrocytes     | 2 |  |
| 933  | 1772062111_A12 | oligodendrocytes     | 2 |  |
| 882  | 1772063068_D10 | oligodendrocytes     | 2 |  |
| 775  | 1772062109_C07 | oligodendrocytes     | 2 |  |
| 786  | 1772062109_B01 | oligodendrocytes     | 2 |  |
| 687  | 1772058148_A01 | oligodendrocytes     | 2 |  |

|      |                |                  |   |  |
|------|----------------|------------------|---|--|
| 582  | 1772062116_B05 | oligodendrocytes | 2 |  |
| 776  | 1772062109_F01 | oligodendrocytes | 2 |  |
| 596  | 1772062128_B02 | oligodendrocytes | 2 |  |
| 1200 | 1772063079_E09 | oligodendrocytes | 2 |  |
| 568  | 1772063070_G03 | oligodendrocytes | 2 |  |
| 592  | 1772062115_G09 | oligodendrocytes | 2 |  |
| 1022 | 1772060226_C04 | oligodendrocytes | 2 |  |
| 634  | 1772062109_C06 | oligodendrocytes | 2 |  |
| 842  | 1772062109_F04 | oligodendrocytes | 2 |  |
| 1031 | 1772060226_E12 | oligodendrocytes | 2 |  |
| 998  | 1772060226_D11 | oligodendrocytes | 2 |  |
| 944  | 1772060225_F12 | oligodendrocytes | 2 |  |
| 1154 | 1772058177_E04 | oligodendrocytes | 2 |  |
| 841  | 1772062118_H04 | oligodendrocytes | 2 |  |
| 700  | 1772058148_A03 | oligodendrocytes | 2 |  |
| 852  | 1772062118_H10 | oligodendrocytes | 2 |  |
| 946  | 1772062118_E02 | oligodendrocytes | 2 |  |
| 935  | 1772060240_G10 | oligodendrocytes | 2 |  |
| 958  | 1772060225_B12 | oligodendrocytes | 2 |  |
| 586  | 1772060224_G07 | oligodendrocytes | 2 |  |
| 979  | 1772062111_H07 | oligodendrocytes | 2 |  |
| 845  | 1772063063_B10 | oligodendrocytes | 2 |  |
| 1127 | 1772063063_A04 | oligodendrocytes | 2 |  |
| 1078 | 1772062109_D10 | oligodendrocytes | 2 |  |
| 1191 | 1772062109_F12 | oligodendrocytes | 2 |  |
| 1152 | 1772058148_A09 | oligodendrocytes | 2 |  |
| 577  | 1772062111_H05 | oligodendrocytes | 2 |  |
| 1197 | 1772062111_H02 | oligodendrocytes | 2 |  |
| 643  | 1772062109_E07 | oligodendrocytes | 2 |  |
| 822  | 1772063062_H08 | oligodendrocytes | 2 |  |
| 647  | 1772062109_G03 | oligodendrocytes | 2 |  |
| 794  | 1772062114_C07 | oligodendrocytes | 2 |  |
| 1130 | 1772063061_E07 | oligodendrocytes | 2 |  |
| 671  | 1772063070_E07 | oligodendrocytes | 2 |  |
| 1023 | 1772060226_H01 | oligodendrocytes | 2 |  |
| 1103 | 1772062118_D10 | oligodendrocytes | 2 |  |
| 737  | 1772062109_C12 | oligodendrocytes | 2 |  |
| 1199 | 1772063079_D02 | oligodendrocytes | 2 |  |
| 675  | 1772067074_F09 | oligodendrocytes | 2 |  |
| 567  | 1772067074_C07 | oligodendrocytes | 2 |  |
| 770  | 1772062113_A05 | oligodendrocytes | 2 |  |
| 1142 | 1772063063_E05 | oligodendrocytes | 2 |  |
| 796  | 1772062114_B03 | oligodendrocytes | 2 |  |
| 984  | 1772063078_E03 | oligodendrocytes | 2 |  |
| 1030 | 1772060226_C03 | oligodendrocytes | 2 |  |
| 1302 | 1772062128_D02 | microglia        | 1 |  |
| 1013 | 1772060226_F08 | oligodendrocytes | 2 |  |
| 1140 | 1772063063_E06 | oligodendrocytes | 2 |  |
| 793  | 1772062118_F02 | oligodendrocytes | 2 |  |
| 1134 | 1772058177_D06 | oligodendrocytes | 3 |  |

|      |                |                  |   |                                                                                     |
|------|----------------|------------------|---|-------------------------------------------------------------------------------------|
| 809  | 1772062113_A01 | oligodendrocytes | 2 |  |
| 924  | 1772063078_F05 | oligodendrocytes | 1 |  |
| 787  | 1772063079_F07 | oligodendrocytes | 2 |  |
| 923  | 1772063062_F03 | oligodendrocytes | 1 |  |
| 1090 | 1772063078_G01 | oligodendrocytes | 1 |  |
| 927  | 1772062116_E04 | oligodendrocytes | 2 |  |
| 649  | 1772062113_H02 | oligodendrocytes | 2 |  |

---
